# Supplementary material for: Novel N7-Arylmethyl Substituted Dinucleotide mRNA 5′ cap Analogs: Synthesis and Evaluation as Modulators of Translation
Source: MDPI journal article supplement (doi:10.3390/pharmaceutics13111941), 2021-11-16

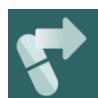

# Supplementary Materials: Novel N7-Arylmethyl Substituted Dinucleotide mRNA 5'cap Analogs: Synthesis and Evaluation as Modulators of Translation

Radosław Wojcik, Marek R. Baranowski, Lukasz Markiewicz, Dorota Kubacka, Marcelina Bednarczyk, Natalia Baran, Anna Wojtcha, Pawel J. Sikorski, Joanna Zuberek, Joanna Kowalska, and Jacek Jemielity

## Supplementary Information

### Table of contents

|                                                                                                             |    |
|-------------------------------------------------------------------------------------------------------------|----|
| S1. Tables.....                                                                                             | 2  |
| S2. Figures .....                                                                                           | 7  |
| S3. Chemical synthesis of novel Gp <sub>3</sub> G cap analogs.....                                          | 12 |
| S4. Spectroscopic data: <sup>1</sup> H, <sup>31</sup> P, <sup>19</sup> F NMR, HRMS and UV/VIS spectra ..... | 21 |

## S1. Tables

Table S1. Structures and yields for N7-benzyl guanosine monophosphate analogues.

| N7-benzylated guanosine monophosphate analogues |                                                                                     |                                                                                     |                                          |
|-------------------------------------------------|-------------------------------------------------------------------------------------|-------------------------------------------------------------------------------------|------------------------------------------|
| E.                                              | Starting material                                                                   | Product                                                                             | Yield % <sup>a</sup><br>(%) <sup>b</sup> |
| 1                                               |    |    | 66 (84)                                  |
|                                                 | <b>3a</b>                                                                           | <b>4a</b>                                                                           |                                          |
| 2                                               |    |    | 40 (65)                                  |
|                                                 | <b>3b</b>                                                                           | <b>4b</b>                                                                           |                                          |
| 3                                               |   |   | 49 (86)                                  |
|                                                 | <b>3c</b>                                                                           | <b>4c</b>                                                                           |                                          |
| 4                                               |  |  | 64 (80)                                  |
|                                                 | <b>3d</b>                                                                           | <b>4d</b>                                                                           |                                          |
| 5                                               |  |  | 58 (82)                                  |
|                                                 | <b>3e</b>                                                                           | <b>4e</b>                                                                           |                                          |
| 6                                               |  |  | 47 (88)                                  |
|                                                 | <b>3f</b>                                                                           | <b>4f</b>                                                                           |                                          |
| 7                                               |  |  | 73 (79)                                  |
|                                                 | <b>3g</b>                                                                           | <b>4g</b>                                                                           |                                          |
| 8                                               |  |  | 45 (70)                                  |
|                                                 | <b>3h</b>                                                                           | <b>4h</b>                                                                           |                                          |

|    |                                                                                     |                                                                                     |         |
|----|-------------------------------------------------------------------------------------|-------------------------------------------------------------------------------------|---------|
| 9  |    |    | 42 (83) |
|    | <b>3i</b>                                                                           | <b>4i</b>                                                                           |         |
| 10 |    |    | 52 (72) |
|    | <b>3j</b>                                                                           | <b>4j</b>                                                                           |         |
| 11 |    |    | 52 (80) |
|    | <b>3k</b>                                                                           | <b>4k</b>                                                                           |         |
| 12 |    |    | 44 (83) |
|    | <b>3l</b>                                                                           | <b>4l</b>                                                                           |         |
| 13 |   |   | 63 (69) |
|    | <b>3m</b>                                                                           | <b>4m</b>                                                                           |         |
| 14 |  |  | 82 (93) |
|    | <b>3n</b>                                                                           | <b>4n</b>                                                                           |         |
| 15 |  |  | 71 (88) |
|    | <b>3o</b>                                                                           | <b>4o</b>                                                                           |         |
| 16 |  |  | 14 (66) |
|    | <b>3p</b>                                                                           | <b>4p</b>                                                                           |         |

---

### N7-benzylated 2'-OMe-guanosine monophosphate analogues

---

|    |                                                                                     |                                                                                     |         |
|----|-------------------------------------------------------------------------------------|-------------------------------------------------------------------------------------|---------|
| 17 |  |  | 51 (74) |
|    | <b>3a</b>                                                                           | <b>4q</b>                                                                           |         |

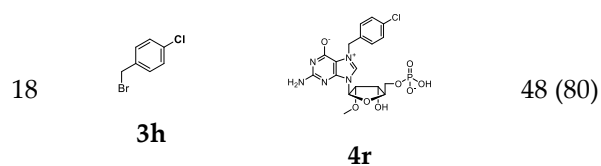

<sup>a</sup>Isolated yield, <sup>b</sup>Conversion based on RP HPLC reaction profile

**Table S2.** Comparison of  $EC_{50}$  and  $K_D$  values determined by FLINT and Fluorescence Anisotropy methods.

| No. | Abbr. | Compound                                 | PyFLINT-B assay            |                            | FA assay             |                            |
|-----|-------|------------------------------------------|----------------------------|----------------------------|----------------------|----------------------------|
|     |       |                                          | $EC_{50}$ ( $\mu$ M)       | $K_D$ (nM)                 | $EC_{50}$ ( $\mu$ M) | $K_D$ (nM)                 |
| 1   |       | m <sup>7</sup> GpppG                     | $2.7 \pm 0.3$              | $229 \pm 37$               | $0.41 \pm 0.01$      | $127 \pm 5$                |
| 2   | 1a    | Bn <sup>7</sup> GpppG                    | $(2.2 \pm 0.3) \cdot 10^1$ | $217 \pm 36$               | $0.27 \pm 0.02$      | $74 \pm 23$                |
| 3   | 1b    | 2-MeBn <sup>7</sup> GpppG                | $3.7 \pm 0.4$              | $(191 \pm 36) \cdot 10^1$  | $3.1 \pm 0.1$        | $(112 \pm 4.9) \cdot 10^1$ |
| 4   | 1c    | 3-MeBn <sup>7</sup> GpppG                | $5.6 \pm 0.6$              | $319 \pm 55$               | $0.67 \pm 0.02$      | $222 \pm 8$                |
| 5   | 1d    | 4-MeBn <sup>7</sup> GpppG                | $6.2 \pm 0.8$              | $482 \pm 81$               | $0.86 \pm 0.03$      | $295 \pm 13$               |
| 6   | 1e    | 4- <i>i</i> PrBn <sup>7</sup> GpppG      | $7.5 \pm 0.9$              | $534 \pm 100$              | $1.3 \pm 0.09$       | $444 \pm 33$               |
| 7   | 1f    | 3,5-di-MeBn <sup>7</sup> GpppG           | $3.1 \pm 0.5$              | $646 \pm 114$              | $1.1 \pm 0.1$        | $384 \pm 41$               |
| 8   | 1g    | 4-F-Bn <sup>7</sup> GpppG                | $2.6 \pm 0.3$              | $261 \pm 54$               | $0.24 \pm 0.08$      | $64 \pm 31$                |
| 9   | 1h    | 4-Cl-Bn <sup>7</sup> GpppG               | $2.0 \pm 0.2$              | $221 \pm 37$               | $0.34 \pm 0.14$      | $102 \pm 53$               |
| 10  | 1i    | 4-Br-Bn <sup>7</sup> GpppG               | $6.9 \pm 0.5$              | $172 \pm 26$               | $0.21 \pm 0.01$      | $52 \pm 3$                 |
| 11  | 1j    | 2,4-di-F-Bn <sup>7</sup> GpppG           | $5.7 \pm 0.5$              | $598 \pm 87$               | $0.87 \pm 0.05$      | $298 \pm 18$               |
| 12  | 1k    | 3,4-di-F-Bn <sup>7</sup> GpppG           | $3.4 \pm 0.2$              | $489 \pm 77$               | $0.88 \pm 0.08$      | $301 \pm 30$               |
| 13  | 1l    | 4-CF <sub>3</sub> -Bn <sup>7</sup> GpppG | $(6.7 \pm 0.8) \cdot 10^2$ | $293 \pm 43$               | $0.59 \pm 0.04$      | $194 \pm 17$               |
| 14  | 1m    | 4-COOH-Bn <sup>7</sup> GpppG             | $4.3 \pm 0.6$              | $(586 \pm 102) \cdot 10^2$ | n.d                  | n.d                        |
| 15  | 1n    | 4-NO <sub>2</sub> -Bn <sup>7</sup> GpppG | $(3.5 \pm 0.3) \cdot 10^1$ | $367 \pm 71$               | $0.52 \pm 0.12$      | $168 \pm 43$               |
| 16  | 1o    | $\alpha$ -Naphm <sup>7</sup> GpppG       | $(1.2 \pm 0.1) \cdot 10^1$ | $(304 \pm 49) \cdot 10^1$  | $2.1 \pm 0.1$        | $739 \pm 49$               |
| 17  | 1p    | $\beta$ -Naphm <sup>7</sup> GpppG        | $2.0 \pm 0.1$              | $(106 \pm 19) \cdot 10^1$  | n.d                  | n.d                        |
| 18  | 1q    | Bn <sup>7</sup> G <sub>m</sub> pppG      | $1.6 \pm 0.1$              | $171 \pm 25$               | $0.18 \pm 0.03$      | $40 \pm 11$                |
| 19  | 1r    | 4-Cl-Bn <sup>7</sup> G <sub>m</sub> pppG | $2.7 \pm 0.3$              | $132 \pm 20$               | $0.19 \pm 0.02$      | $45 \pm 7$                 |

**Table S3.** Data collection and refinement statistics for crystal structures.

|                                        | <b>bn<sup>7</sup>GpppG (1a)</b> | <b>3Me-bn<sup>7</sup>GpppG (1c)</b> | <b>4-Cl-bn<sup>7</sup>GpppG (1h)</b> |
|----------------------------------------|---------------------------------|-------------------------------------|--------------------------------------|
| <b>PDB code</b>                        | 6YLR                            | 6YLT                                | 6YLV                                 |
| <b>Wavelength (Å)</b>                  | 0.9184                          | 0.9184                              | 0.9184                               |
| <b>Resolution range (Å)</b>            | 42.06 - 2.20<br>(2.27 - 2.20)   | 49.31 - 2.67<br>(2.77 - 2.67)       | 37.4 - 2.66<br>(2.76 - 2.66)         |
| <b>Space group</b>                     | P 43                            | P 1                                 | P 1                                  |
| <b>Cell dimensions</b>                 | 94.0 94.0 42.4<br>90 90 90      | 38.3 38.3 148.8 84.0<br>87.8 76.8   | 38.4 38.4 148.1 85.3<br>88.4 77.2    |
| <b>Total reflections</b>               | 134095 (13102)                  | 88377 (7780)                        | 103757 (4113)                        |
| <b>Unique reflections</b>              | 19244 (1869)                    | 23009 (2275)                        | 22090 (1453)                         |
| <b>Multiplicity</b>                    | 7.0 (7.0)                       | 3.8 (3.4)                           | 4.7 (2.8)                            |
| <b>Completeness (%)</b>                | 99.4 (96.9)                     | 98.9 (96.8)                         | 93.6 (60.4)                          |
| <b>Mean I/sigma(I)</b>                 | 11.0 (2.0)                      | 9.8 (2.0)                           | 10.3 (2.0)                           |
| <b>Wilson B-factor (Å<sup>2</sup>)</b> | 37.5                            | 33.8                                | 37.7                                 |
| <b>R-merge</b>                         | 0.147 (0.865)                   | 0.134 (0.616)                       | 0.112 (0.571)                        |
| <b>R-meas</b>                          | 0.160 (0.934)                   | 0.155 (0.730)                       | 0.126 (0.680)                        |
| <b>CC<sub>1/2</sub></b>                | 0.995 (0.805)                   | 0.99 (0.673)                        | 0.991 (0.764)                        |
| <b>CC*</b>                             | 0.999 (0.944)                   | 0.998 (0.897)                       | 0.998 (0.931)                        |
| <b>Reflections used in refinement</b>  | 19182 (1824)                    | 22996 (2274)                        | 22080 (1453)                         |
| <b>Reflections used for R-free</b>     | 961 (92)                        | 849 (84)                            | 814 (54)                             |
| <b>R-work</b>                          | 0.224 (0.357)                   | 0.192 (0.240)                       | 0.201 (0.253)                        |
| <b>R-free</b>                          | 0.270 (0.359)                   | 0.243 (0.316)                       | 0.255 (0.325)                        |
| <b>CC(work)</b>                        | 0.943 (0.724)                   | 0.938 (0.823)                       | 0.936 (0.837)                        |
| <b>CC(free)</b>                        | 0.915 (0.682)                   | 0.885 (0.851)                       | 0.906 (0.759)                        |
| <b>Number of non-hydrogen atoms</b>    | 3046                            | 6344                                | 6292                                 |
| <b>macromolecules</b>                  | 2761                            | 5685                                | 5798                                 |
| <b>ligands</b>                         | 93                              | 356                                 | 252                                  |
| <b>solvent</b>                         | 192                             | 303                                 | 242                                  |
| <b>Protein residues</b>                | 354                             | 726                                 | 725                                  |
| <b>RMS(bonds) (Å)</b>                  | 0.003                           | 0.008                               | 0.006                                |
| <b>RMS(angles) (deg)</b>               | 0.76                            | 0.97                                | 0.76                                 |
| <b>Ramachandran favored (%)</b>        | 98.0                            | 98.5                                | 98.0                                 |
| <b>Ramachandran allowed (%)</b>        | 2.0                             | 1.5                                 | 2.0                                  |
| <b>Ramachandran outliers (%)</b>       | 0                               | 0                                   | 0                                    |
| <b>Rotamer outliers (%)</b>            | 0.0                             | 0.2                                 | 0.2                                  |
| <b>Clashscore</b>                      | 3.5                             | 6.4                                 | 7.2                                  |
| <b>Average B-factor</b>                | 58.3                            | 42.0                                | 44.7                                 |
| <b>macromolecules</b>                  | 59.2                            | 41.5                                | 44.5                                 |
| <b>ligands</b>                         | 56.9                            | 53.3                                | 58.5                                 |
| <b>solvent</b>                         | 47.2                            | 37.9                                | 35.6                                 |

---

|                             |    |    |    |
|-----------------------------|----|----|----|
| <b>Number of TLS groups</b> | 12 | 25 | 25 |
|-----------------------------|----|----|----|

---

Statistics for the highest-resolution shell are shown in parentheses.

## S2. Figures

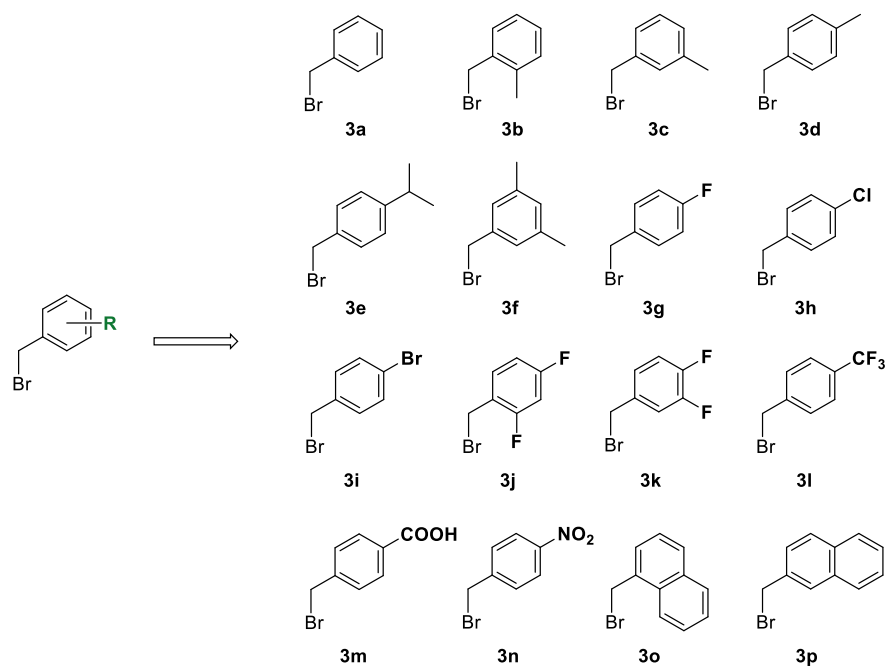

Figure S1. Structures of benzyl bromides used in this work.

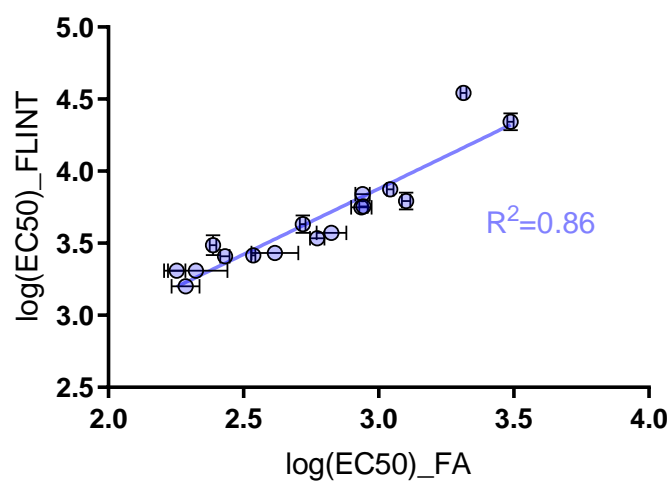

Figure S2. Correlation between the  $EC_{50}$  values determined from PyFLINT-B versus fluorescence anisotropy (FA) assay.

Bn<sup>7</sup>GpppG (1a)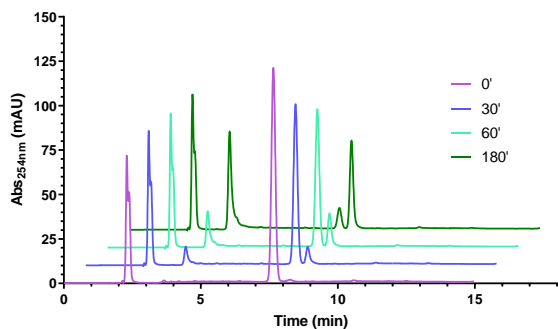3-MeBn<sup>7</sup>GpppG (1c)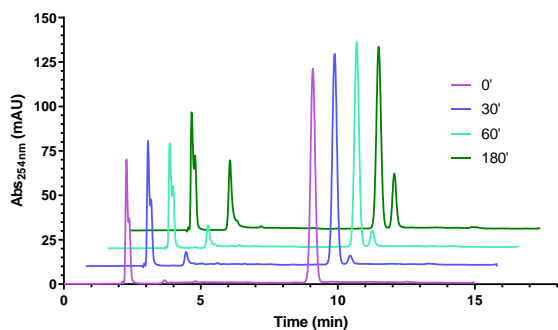4-*i*PrBn<sup>7</sup>GpppG (1e)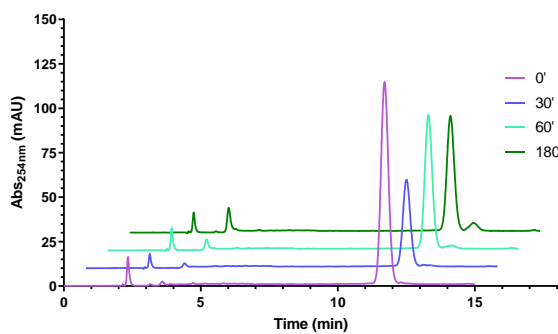

4-F-Bn<sup>7</sup>GpppG (1g)

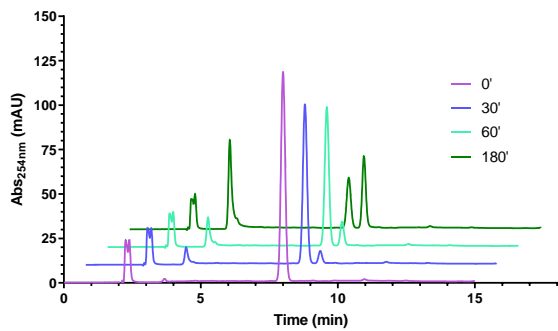



4-Cl-Bn<sup>7</sup>GpppG (1h)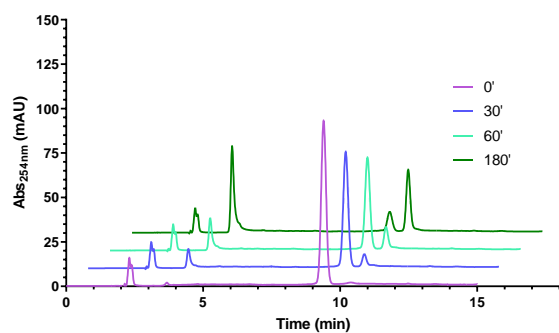4-Br-Bn<sup>7</sup>GpppG (1i)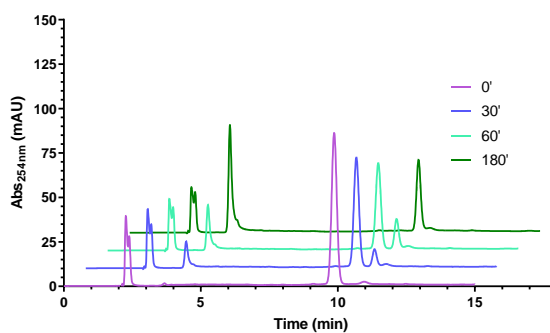2,4-di-F-Bn<sup>7</sup>GpppG (1j)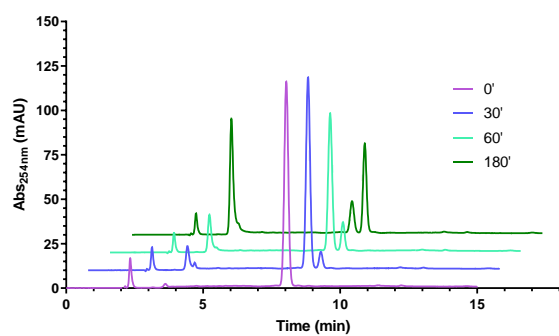3,4-di-F-Bn<sup>7</sup>GpppG (1k)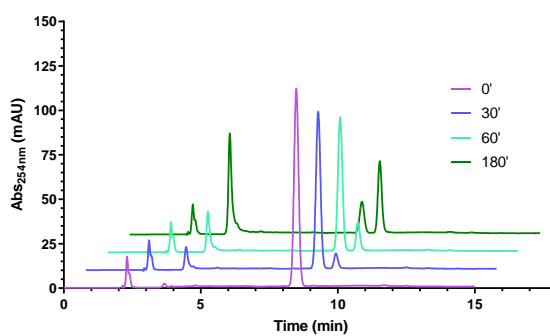4-CF<sub>3</sub>-Bn<sup>7</sup>GpppG (1l)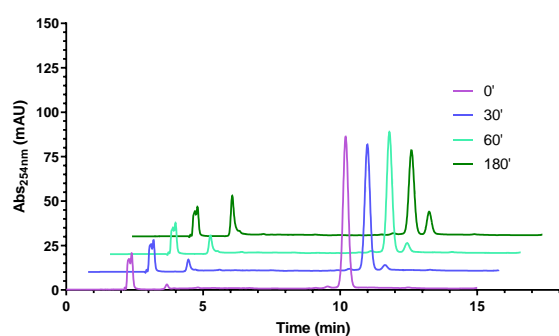4-COOH-Bn<sup>7</sup>GpppG (1m)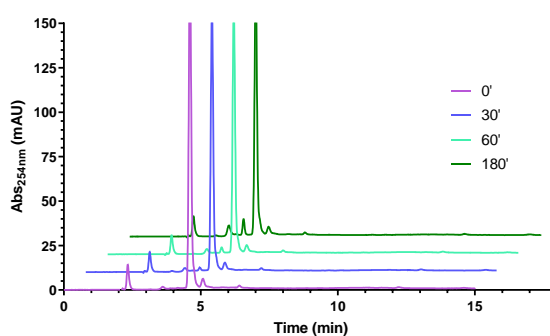4-NO<sub>2</sub>-Bn<sup>7</sup>GpppG (1n) $\alpha$ -Naphm<sup>7</sup>GpppG (1o)

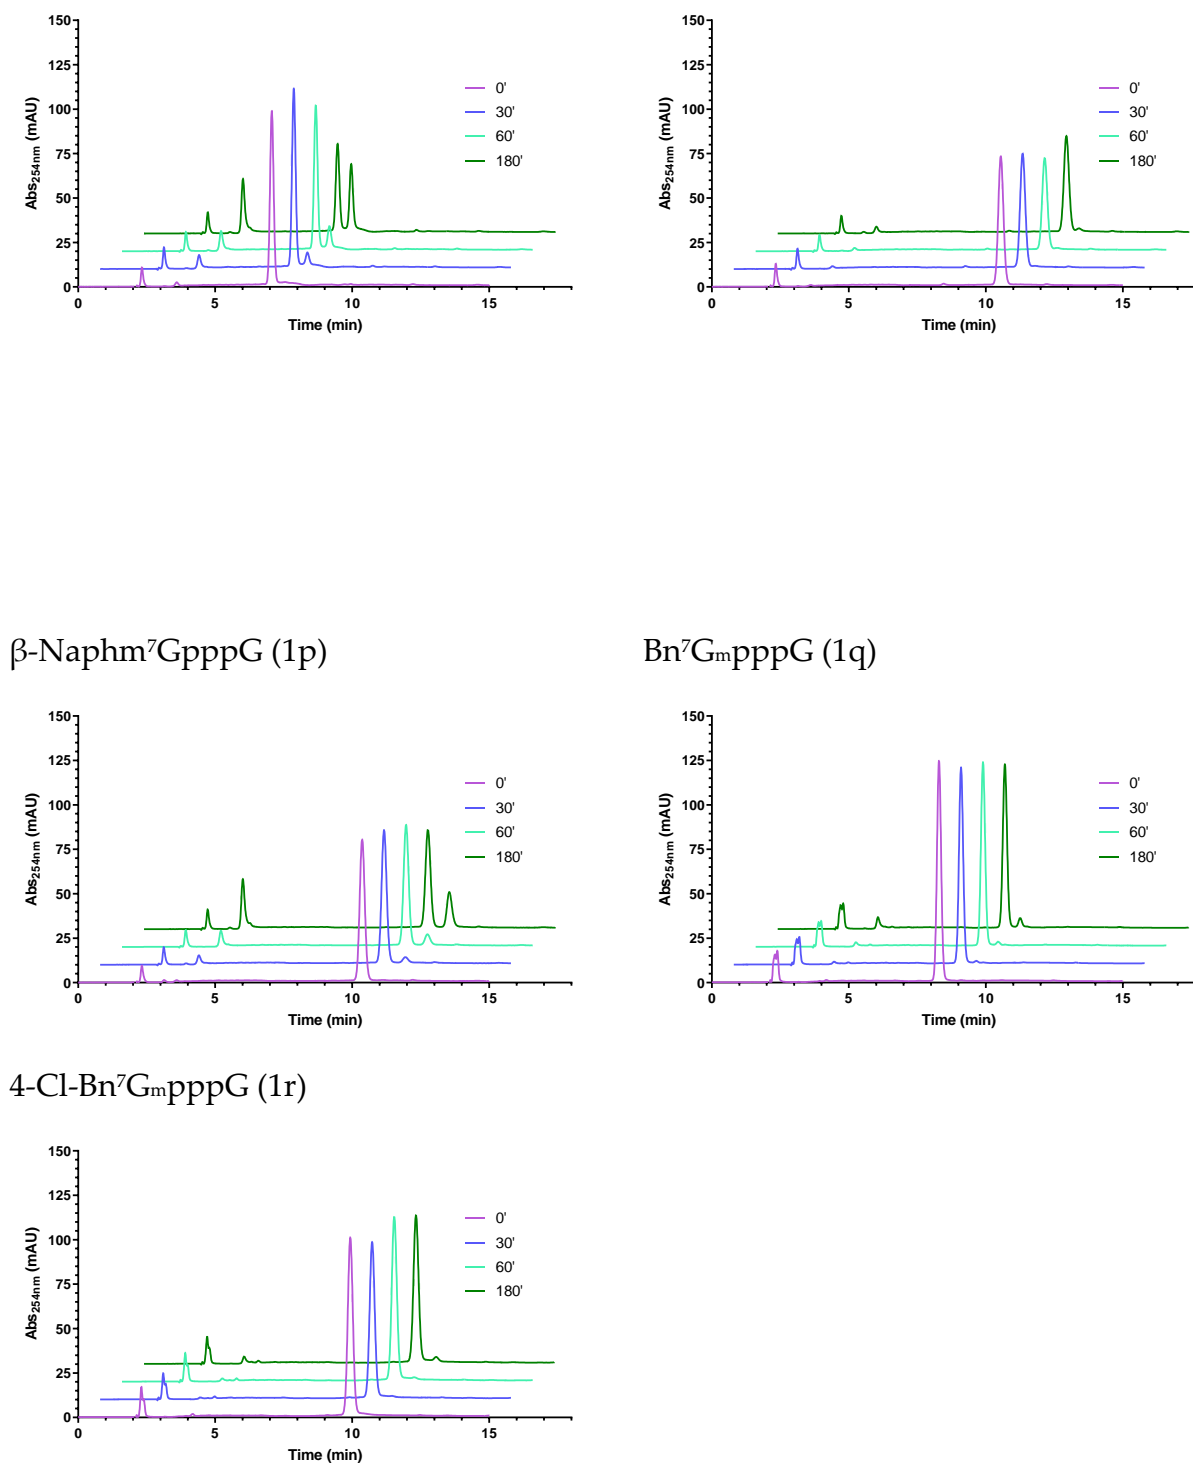

**Figure S3.** Analysis of cap analog susceptibility to hydrolysis by DcpS using RP-HPLC.

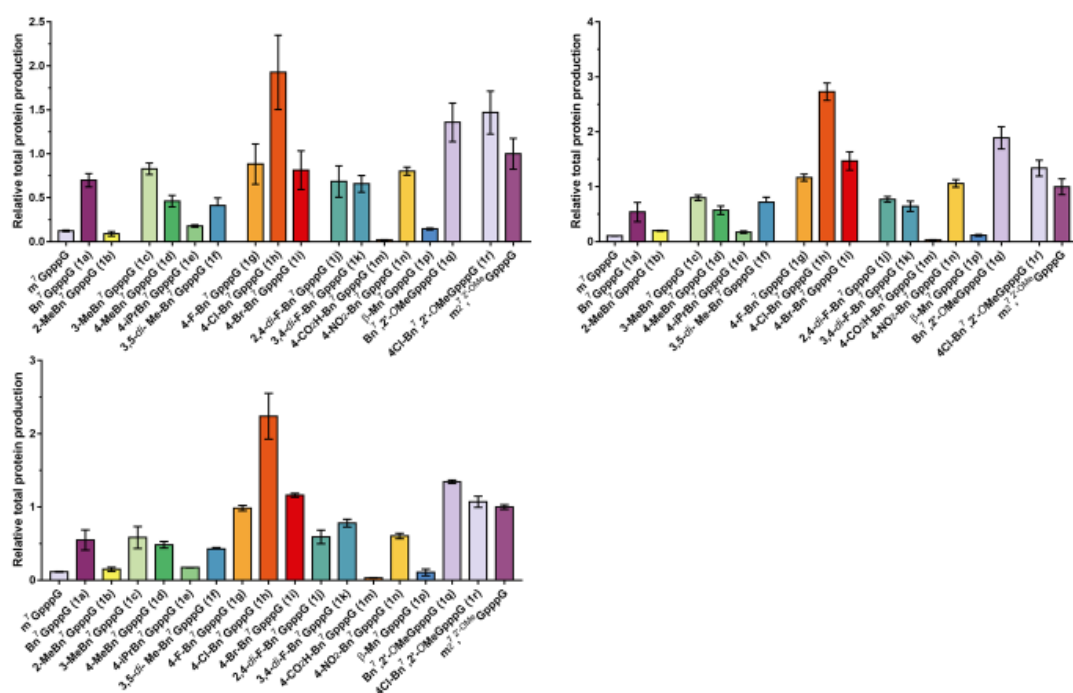

**Figure S4.** Relative total protein expression in three independent experiments. Data are normalized to  $m^7GpppG$ -RNA  $\pm$  SD.

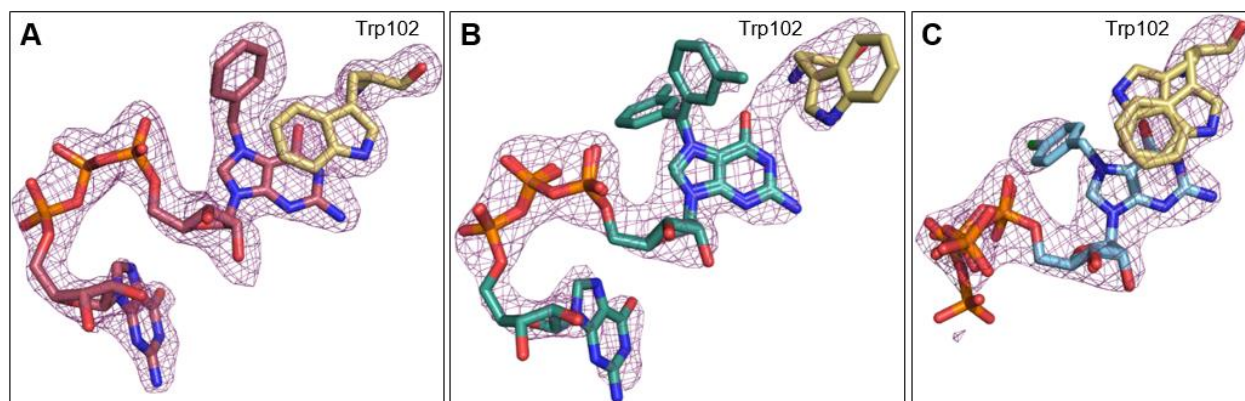

**Figure S5.** Simulated annealing omit map ( $F_o - F_c$ ) contoured at  $3\sigma$  around compound **1a** (A), **1c** (B), **1h** (C) and Trp102 from the solved X-ray structures of eIF4E in complex with cap analog

### S3. Chemical synthesis of novel Gp<sub>3</sub>G cap analogs

#### 1a) Synthesis of Bn<sup>7</sup>GpppG

P1-(7-benzylguanosin-5'-yl) P3-5'-guanosine

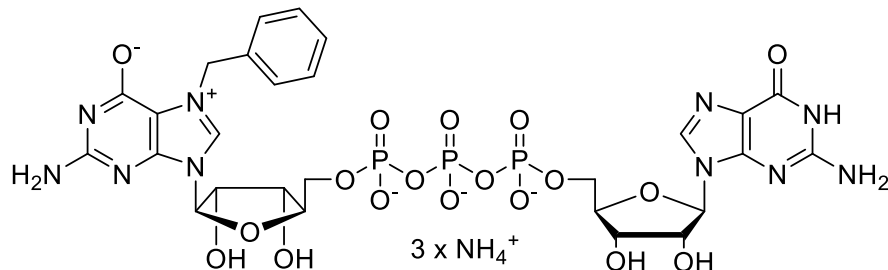

Bn<sup>7</sup>GpppG (**1a**) was prepared according to GP-B starting from Bn<sup>7</sup>GMP/TEA<sup>+</sup> (**4a**) (109 mg, 500 mOD, 0.046 mmol), DMSO (8.0 ml), GDP-Im/Na<sup>+</sup> (**5a**) (23 mg, 500 mOD, 0.043 mmol) and ZnCl<sub>2</sub> (47 mg, 0.344 mmol) yielding 14.86 mg of **1a** ammonium salt (507 mOD, 0.022 mmol, 51%). Reaction time: 24h.

<sup>1</sup>H NMR (500 MHz, D<sub>2</sub>O)  $\delta$  = 9.37 (s, 1H), 8.06 (s, 1H), 7.38 – 7.28 (m, 5H), 5.93 (d,  $J$  = 3.7 Hz, 1H), 5.78 (d,  $J$  = 5.9 Hz, 1H), 5.57 (s, 2H), 4.66 (dd,  $J$  = 5.9, 5.2 Hz, 1H), 4.65 (dd,  $J$  = 5.0, 3.7 Hz, 1H), 4.49 (t,  $J$  = 5.0 Hz, 1H), 4.46 (dd,  $J$  = 5.2, 3.3 Hz, 1H), 4.43 – 4.35 (m, 2H), 4.33 – 4.18 (m, 4H);

<sup>31</sup>P NMR (202 MHz, D<sub>2</sub>O)  $\delta$  = -10.29 – -10.73 (m, 2P), -22.15 (t,  $J$  = 19.4 Hz, 1P)

HRMS ESI (-) calcd.  $m/z$  for C<sub>27</sub>H<sub>32</sub>N<sub>10</sub>O<sub>18</sub>P<sub>3</sub><sup>-</sup> [M-H]<sup>-</sup> : 877.11144, found 877.11251

#### 1b) Synthesis of 2-MeBn<sup>7</sup>GpppG

P1-(7-(2-methylbenzyl)guanosin-5'-yl) P3-5'-guanosine

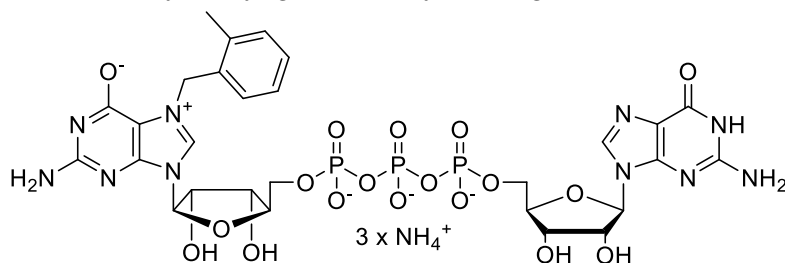

2-MeBn<sup>7</sup>GpppG (**1b**) was prepared according to GP-B starting from 2-MeBn<sup>7</sup>GMP/TEA<sup>+</sup> (**4b**) (69 mg, 250 mOD, 0.025 mmol), DMSO (10.0 ml), GDP-Im/Na<sup>+</sup> (**5a**) (12 mg, 250 mOD, 0.022 mmol) and ZnCl<sub>2</sub> (24 mg, 0.176 mmol) yielding 7.07 mg of **1b** ammonium salt (193 mOD, 0.0086 mmol, 39%). Reaction time: 24h.

<sup>1</sup>H NMR (500 MHz, D<sub>2</sub>O)  $\delta$  = 9.21 (s, 1H), 8.13 (s, 1H), 7.20 – 6.86 (m, 4H), 5.94 (d,  $J$  = 3.9 Hz, 1H), 5.81 (d,  $J$  = 5.8 Hz, 1H), 5.58 (s, 2H), 4.71 (dd,  $J$  = 5.1, 3.9 Hz, 1H), 4.66 (dd,  $J$  = 5.8, 5.1 Hz, 1H), 4.51 (t,  $J$  = 5.1, 1H), 4.47 (dd,  $J$  = 5.1, 3.5 Hz, 1H), 4.42 – 4.32 (m, 2H), 4.32 – 4.17 (m, 4H), 2.31 (s, 3H);

<sup>31</sup>P NMR (202 MHz, D<sub>2</sub>O)  $\delta$  = -10.32 – -10.72 (m, 2P), -22.72 – -22.47 (s, 1P)

HRMS ESI (-) calcd.  $m/z$  for C<sub>28</sub>H<sub>34</sub>N<sub>10</sub>O<sub>18</sub>P<sub>3</sub><sup>-</sup> [M-H]<sup>-</sup> : 891.12709, found 891.12841

### 1c) Synthesis of 3-MeBn<sup>7</sup>GpppG

P1-(7-(3-methylbenzyl)guanosin-5'-yl) P3-5'-guanosine

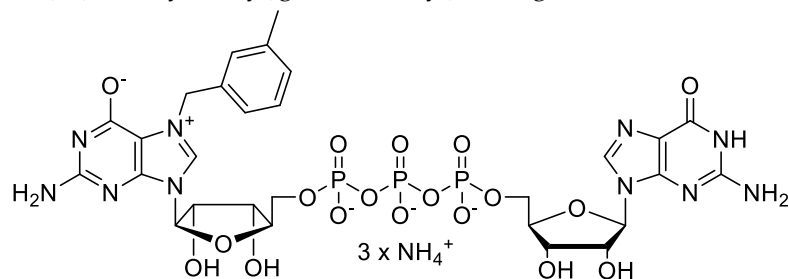

3-MeBn<sup>7</sup>GpppG (**1c**) was prepared according to GP-B starting from 3-MeBn<sup>7</sup>GMP/TEA<sup>+</sup> (**4c**) (56 mg, 500 mOD, 0.049 mmol), DMSO (8.0 ml), GDP-Im/Na<sup>+</sup> (**5a**) (23 mg, 500 mOD, 0.043 mmol) and ZnCl<sub>2</sub> (71 mg, 0.516 mmol) yielding 17.33 mg of **1c** ammonium salt (355 mOD, 0.016 mmol, 36%). Re-

action time: 24h.

<sup>1</sup>H NMR (500 MHz, D<sub>2</sub>O) δ = 9.38 (s, 1H), 8.11 (s, 1H), 7.18 – 7.02 (m, 4H), 5.94 (d, *J* = 3.7 Hz, 1H), 5.78 (d, *J* = 5.6 Hz, 1H), 5.50 (s, 2H), 4.67 (dd, *J* = 5.0, 3.7 Hz, 1H), 4.65 (dd, *J* = 5.6, 5.1 Hz, 1H, overlapped with 4.67 (dd)), 4.51 (t, *J* = 5.0 Hz, 1H), 4.47 (dd, *J* = 5.0, 3.5 Hz, 1H), 4.42 – 4.37 (m, 2H), 4.32 – 4.19 (m, 4H), 2.22 (s, 3H);

<sup>31</sup>P NMR (202 MHz, D<sub>2</sub>O) δ = -10.25 – -10.65 (m, 2P), -21.66 – -22.55 (m, 1P)

HRMS ESI (-) calcd. *m/z* for C<sub>28</sub>H<sub>34</sub>N<sub>10</sub>O<sub>18</sub>P<sub>3</sub><sup>-</sup> [M-H]<sup>-</sup> : 891.12709, found 891.12828

### 1d) Synthesis of 4-MeBn<sup>7</sup>GpppG

P1-(7-(4-methylbenzyl)guanosin-5'-yl) P3-5'-guanosine

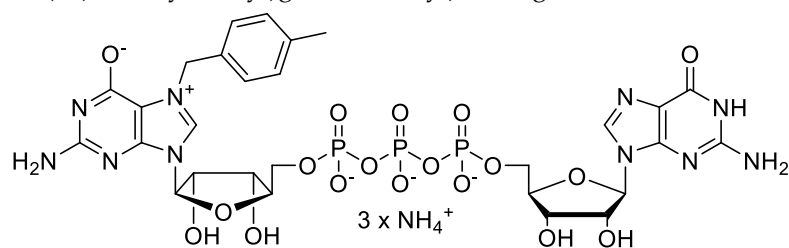

4-MeBn<sup>7</sup>GpppG (**1d**) was prepared according to GP-B starting from 4-MeBn<sup>7</sup>GMP/TEA<sup>+</sup> (**4d**) (41 mg, 200 mOD, 0.019 mmol), DMSO (8.0 ml), GDP-Im/Na<sup>+</sup> (**5a**) (12 mg, 250 mOD, 0.022 mmol) and ZnCl<sub>2</sub> (24 mg, 0.176 mmol) yielding 6.75 mg of **1d**

ammonium salt (243 mOD, 0.011 mmol, 58%). Reaction time: 24h.

<sup>1</sup>H NMR (500 MHz, D<sub>2</sub>O) δ = 9.37 (s, 1H), 8.08 (s, 1H), 7.21 (d, *J* = 7.8 Hz, 2H), 7.06 (d, *J* = 7.8 Hz, 2H), 5.93 (d, *J* = 3.7 Hz, 1H), 5.76 (d, *J* = 5.7 Hz, 1H), 5.49 (s, 2H), 4.65 (dd, *J* = 5.0, 3.7 Hz, 1H), 4.64 (dd, *J* = 5.7, 5.1 Hz, 1H, overlapped with 4.65 (dd)), 4.50 (dd, *J* = 5.0, 5.0 Hz, 1H), 4.47 (dd, *J* = 5.1, 3.4 Hz, 1H), 4.41 – 4.37 (m, 2H), 4.32 – 4.19 (m, 4H), 2.20 (s, 3H);

<sup>31</sup>P NMR (202 MHz, D<sub>2</sub>O) δ = -10.23 – -10.65 (m, 2P), -21.67 – -22.55 (s, 1P)

HRMS ESI (-) calcd. *m/z* for C<sub>28</sub>H<sub>34</sub>N<sub>10</sub>O<sub>18</sub>P<sub>3</sub><sup>-</sup> [M-H]<sup>-</sup> : 891.12709, found 891.12867

### 1e) Synthesis of 4-*i*PrBn<sup>7</sup>GpppG

P1-(7-(4-isopropylbenzyl)guanosin-5'-yl) P3-5'-guanosine

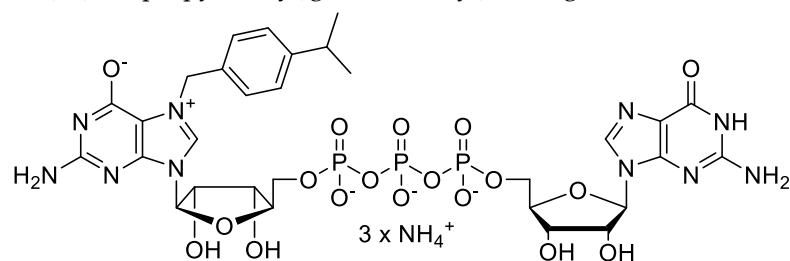

4-*i*PrBn<sup>7</sup>GpppG (**1e**) was prepared according to GP-B starting from 4-*i*PrBn<sup>7</sup>GMP/TEA<sup>+</sup> (**4e**) (37 mg, 250 mOD, 0.023 mmol), DMSO (10.0 ml), GDP-Im/Na<sup>+</sup> (**5a**) (12 mg, 250 mOD, 0.022 mmol) and ZnCl<sub>2</sub> (24 mg, 0.176 mmol) yielding 8.69 mg of **1e** ammonium salt (206 mOD, 0.0092 mmol, 42%). Reaction time: 24h.

<sup>1</sup>H NMR (500 MHz, D<sub>2</sub>O)  $\delta$  = 9.42 (s, 1H), 8.17 (s, 1H), 7.25 (d, *J* = 8.0 Hz, 2H), 7.08 (d, *J* = 8.0 Hz, 2H), 5.94 (d, *J* = 3.7 Hz, 1H), 5.80 (d, *J* = 5.4 Hz, 1H), 5.53 (s, 2H), 4.65 (dd, *J* = 5.0, 3.7 Hz, 1H), 4.60 (t, *J* = 5.4, 1H), 4.51 (t, *J* = 5.0 Hz, 1H), 4.46 (dd, *J* = 5.3, 3.6 Hz, 1H), 4.42 – 4.37 (m, 2H), 4.32 – 4.20 (m, 4H), 2.72 (hept, *J* = 6.9 Hz, 1H), 1.06 (d, *J* = 6.9 Hz, 3H), 1.05 (d, *J* = 6.9 Hz, 3H, overlapped with 1.06 (d));

<sup>31</sup>P NMR (202 MHz, D<sub>2</sub>O)  $\delta$  = -10.28 – -10.60 (m, 2P), -22.04 (t, *J* = 19.2 Hz, 1P)

HRMS ESI (-) calcd. *m/z* for C<sub>30</sub>H<sub>38</sub>N<sub>10</sub>O<sub>18</sub>P<sub>3</sub><sup>-</sup> [M-H]<sup>-</sup> : 915.15839, found 919.15983

### 1f) Synthesis of 3,5-di-MeBn<sup>7</sup>GpppG

P1-(7-(3,5-dimethylbenzyl)guanosin-5'-yl) P3-5'-guanosine

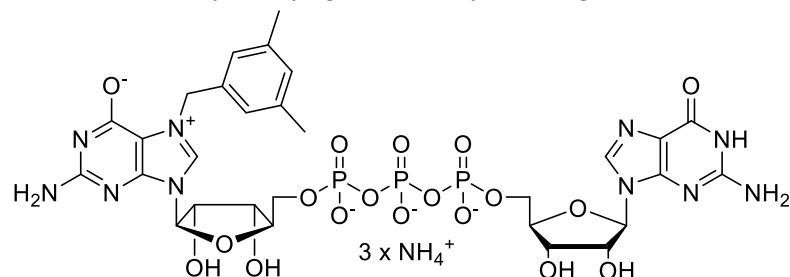

3,5-diMeBn<sup>7</sup>GpppG (**1f**) was prepared according to GP-B starting from 3,5-diMeBn<sup>7</sup>GMP/TEA<sup>+</sup> (**4f**) (11 mg, 250 mOD, 0.025 mmol), DMSO (10.0 ml), GDP-Im/Na<sup>+</sup> (**5a**) (12 mg, 250 mOD, 0.022 mmol) and ZnCl<sub>2</sub> (24 mg, 0.176 mmol) yielding 14.61 mg of **1f** ammonium salt (307 mOD, 0.014 mmol,

62%). Reaction time: 24h.

<sup>1</sup>H NMR (500 MHz, D<sub>2</sub>O)  $\delta$  = 9.39 (s, 1H), 8.10 (s, 1H), 6.91 (s, 2H), 6.80 (s, 1H), 5.93 (d, *J* = 3.8 Hz, 1H), 5.77 (d, *J* = 5.6 Hz, 1H), 5.45 (s, 2H), 4.66 (dd, *J* = 4.9, 3.8 Hz, 1H), 4.64 (dd, *J* = 5.6, 5.1 Hz, 1H), 4.51 (t, *J* = 5.0, 5.0 Hz, 1H), 4.47 (dd, *J* = 5.1, 3.5 Hz, 1H), 4.42 – 4.37 (m, 2H), 4.32 – 4.20 (m, 4H), 2.14 (s, 6H);

<sup>31</sup>P NMR (202 MHz, D<sub>2</sub>O)  $\delta$  = -10.27 – -10.64 (m, 2P), -22.11 (t, *J* = 19.3 Hz, 1P)

HRMS ESI (-) calcd. *m/z* for C<sub>29</sub>H<sub>36</sub>N<sub>10</sub>O<sub>18</sub>P<sub>3</sub><sup>-</sup> [M-H]<sup>-</sup> : 905.14274, found 905.14393

### 1g) Synthesis of 4-F-Bn<sup>7</sup>GpppG

P1-(7-(4-fluorobenzyl)guanosin-5'-yl) P3-5'-guanosine

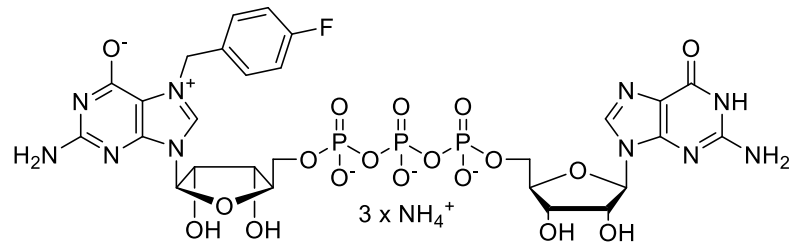

4-F-Bn<sup>7</sup>GpppG (**1g**) was prepared according to GP-B starting from 4-F-Bn<sup>7</sup>GMP/TEA<sup>+</sup> (**4g**) (77 mg, 500 mOD, 0.046 mmol), DMSO (8.0 ml), GDP-Im/Na<sup>+</sup> (**5a**) (23 mg, 500 mOD, 0.043 mmol) and ZnCl<sub>2</sub> (47 mg, 0.344 mmol) yielding 16.83 mg of **1g** ammonium salt (432 mOD, 0.019 mmol, 44%). Re-

action time: 24h.

<sup>1</sup>H NMR (500 MHz, D<sub>2</sub>O) δ = 9.40 (s, 1H), 8.16 (s, 1H), 7.42 – 7.36 (m, 2H), 7.05 – 6.97 (m, 2H), 5.94 (d, *J* = 3.7 Hz, 1H), 5.79 (d, *J* = 5.7 Hz, 1H), 5.54 (s, 2H), 4.67 (dd, *J* = 5.7, 5.3 Hz, 1H), 4.65 (dd, *J* = 4.9, 3.7 Hz, 1H, overlapped with 4.67 (dd)), 4.50 (dd, *J* = 5.0, 4.9 Hz, 1H), 4.47 (dd, *J* = 5.3, 3.5 Hz, 1H), 4.42 – 4.37 (m, 2H), 4.32 – 4.20 (m, 4H);

<sup>31</sup>P NMR (202 MHz, D<sub>2</sub>O) δ = -10.30 – -10.63 (m, 2P), -22.14 (t, *J* = 19.3 Hz, 1P)

<sup>19</sup>F NMR (471 MHz, D<sub>2</sub>O) δ = -113.35 – -113.43 (m, 1F)

HRMS ESI (-) calcd. *m/z* for C<sub>27</sub>H<sub>31</sub>FN<sub>10</sub>O<sub>18</sub>P<sub>3</sub><sup>-</sup> [M-H]<sup>-</sup> : 895.10202, found 895.10312

### 1h) Synthesis of 4-Cl-Bn<sup>7</sup>GpppG

P1-(7-(4-chlorobenzyl)guanosin-5'-yl) P3-5'-guanosine

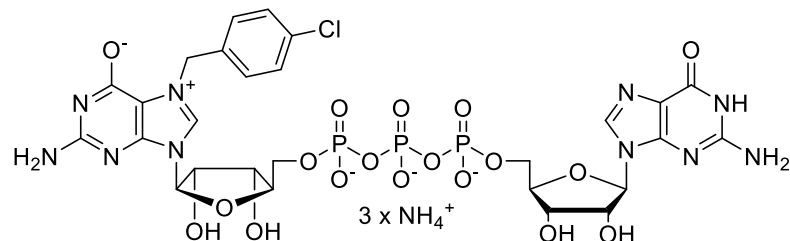

4-Cl-Bn<sup>7</sup>GpppG (**1h**) was prepared according to GP-B starting from 4-Cl-Bn<sup>7</sup>GMP/TEA<sup>+</sup> (**4h**) (206 mg, 1000 mOD, 0.095 mmol), DMSO (10.0 ml), GDP-Im/Na<sup>+</sup> (**5a**) (46 mg, 1000 mOD, 0.086 mmol) and ZnCl<sub>2</sub> (94 mg, 0.688 mmol) yielding 31.27 mg

of **1h** ammonium salt (442 mOD, 0.020 mmol, 22%). Reaction time: 24h.

<sup>1</sup>H NMR (500 MHz, D<sub>2</sub>O) δ = 9.46 (s, 1H), 8.10 (s, 1H), 7.30 (d, *J* = 8.4 Hz, 2H), 7.22 (d, *J* = 8.4 Hz, 2H), 5.96 (d, *J* = 3.7 Hz, 1H), 5.77 (d, *J* = 5.8 Hz, 1H), 5.54 (s, 2H), 4.67 (dd, *J* = 5.8, 5.1 Hz, 1H), 4.66 (dd, *J* = 5.0, 3.7 Hz, 1H, overlapped with 4.67 (dd)), 4.50 (dd, *J* = 5.0, 5.0 Hz, 1H), 4.46 (dd, *J* = 5.1, 3.4 Hz, 1H), 4.42 – 4.37 (m, 2H), 4.32 – 4.20 (m, 4H);

<sup>31</sup>P NMR (202 MHz, D<sub>2</sub>O) δ = -10.21 – -10.64 (m, 2P), -22.73 – 22.61 (m, 1P)

HRMS ESI (-) calcd. *m/z* for C<sub>27</sub>H<sub>31</sub>ClN<sub>10</sub>O<sub>18</sub>P<sub>3</sub><sup>-</sup> [M-H]<sup>-</sup> : 911.07247, found 911.07402

**1i) Synthesis of 4-Br-Bn<sup>7</sup>GpppG**

P1-(7-(4-bromobenzyl)guanosin-5'-yl) P3-5'-guanosine

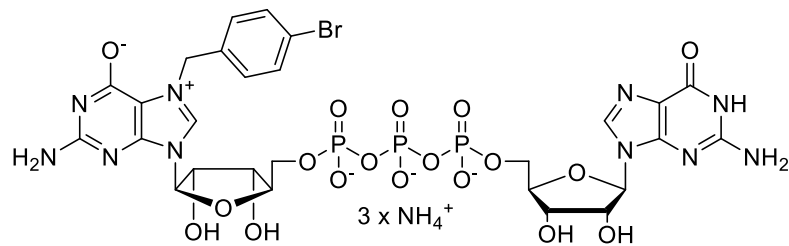

4-Br-Bn<sup>7</sup>GpppG (**1i**) was prepared according to GP-B starting from 4-Br-Bn<sup>7</sup>GMP/TEA<sup>+</sup> (**4i**) (28 mg, 333 mOD, 0.031 mmol), DMSO (8.0 ml), GDP-Im/Na<sup>+</sup> (**5a**) (23 mg, 500 mOD, 0.043 mmol) and ZnCl<sub>2</sub> (47 mg, 0.344 mmol) yielding 19.93 mg of **1i**

ammonium salt (372 mOD, 0.017 mmol, 56%). Reaction time: 24h.

<sup>1</sup>H NMR (500 MHz, D<sub>2</sub>O) δ = 9.48 (s, 1H), 8.18 (s, 1H), 7.27 (d, *J* = 8.5 Hz, 2H), 7.18 (d, *J* = 8.5 Hz, 2H), 5.97 (d, *J* = 3.5 Hz, 1H), 5.79 (d, *J* = 5.4 Hz, 1H), 5.52 (d, *J* = 15.2 Hz, 1H), 5.48 (d, *J* = 15.2 Hz, 1H), 4.66 (dd, *J* = 4.8, 3.5 Hz, 1H), 4.63 (dd, *J* = 5.4, 5.4 Hz, 1H, overlapped with 4.66 (dd)), 4.51 (t, 4.8 Hz, 1H), 4.46 (dd, *J* = 5.4, 3.8 Hz, 1H), 4.43 – 4.38 (m, 2H), 4.32 – 4.20 (m, 4H);

<sup>31</sup>P NMR (202 MHz, D<sub>2</sub>O) δ = -10.06 – -10.72 (m, 2P), -21.59 – -22.58 (m, 1P)

HRMS ESI (-) calcd. *m/z* for C<sub>27</sub>H<sub>31</sub>BrN<sub>10</sub>O<sub>18</sub>P<sub>3</sub><sup>-</sup> [M-H]<sup>-</sup> : 955.02195, found 955.02287

**1j) Synthesis of 2,4-di-F-Bn<sup>7</sup>GpppG**

P1-(7-(2,4-difluorobenzyl)guanosin-5'-yl) P3-5'-guanosine

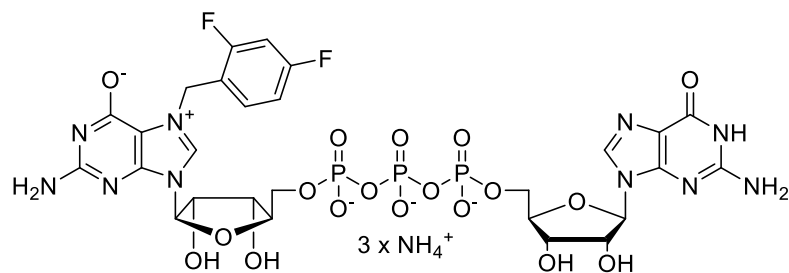

2,4-di-F-Bn<sup>7</sup>GpppG (**1j**) was prepared according to GP-B starting from 2,4-di-F-Bn<sup>7</sup>GMP/TEA<sup>+</sup> (**4j**) (55 mg, 250 mOD, 0.024 mmol), DMSO (8.0 ml), GDP-Im/Na<sup>+</sup> (**5a**) (12 mg, 250 mOD, 0.022 mmol) and ZnCl<sub>2</sub> (24 mg, 0.176 mmol) yielding 7.05 mg

of **1j** ammonium salt (178 mOD, 0.0079 mmol, 36%). Reaction time: 24h.

<sup>1</sup>H NMR (500 MHz, D<sub>2</sub>O) δ = 9.34 (s, 1H), 8.11 (s, 1H), 7.42 – 7.35 (m, 1H), 6.93 – 6.86 (m, 2H), 5.95 (d, *J* = 3.8 Hz, 1H), 5.81 (d, *J* = 6.0 Hz, 1H), 5.61 (s, 2H), 4.70 (dd, *J* = 6.0, 5.2 Hz, 1H), 4.68 (dd, *J* = 4.8, 3.8 Hz, 1H, overlapped with 4.70 (dd)), 4.51 – 4.48 (m, 2H), 4.41 – 4.36 (m, 2H), 4.32 – 4.20 (m, 4H);

<sup>31</sup>P NMR (202 MHz, D<sub>2</sub>O) δ = -10.23 – -10.73 (m, 2P), -22.18 (t, *J* = 19.3 Hz, 1P)

<sup>19</sup>F NMR (471 MHz, D<sub>2</sub>O) δ = -108.75 – -108.79 (m, 1F), -112.85 – -112.99 (m, 1F)

HRMS ESI (-) calcd. *m/z* for C<sub>27</sub>H<sub>30</sub>F<sub>2</sub>N<sub>10</sub>O<sub>18</sub>P<sub>3</sub><sup>-</sup> [M-H]<sup>-</sup> : 913.09259, found 913.09407



### 1k) Synthesis of 3,4-di-F-Bn<sup>7</sup>GpppG

P1-(7-(3,4-difluorobenzyl)guanosin-5'-yl) P3-5'-guanosine

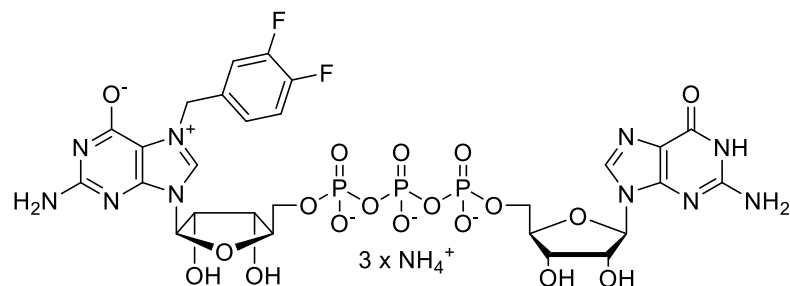

3,4-di-F-Bn<sup>7</sup>GpppG (**1k**) was prepared according to GP-B starting from 3,4-di-F-Bn<sup>7</sup>GMP/TEA<sup>+</sup> (**4k**) (49 mg, 250 mOD, 0.025 mmol), DMSO (10.0 ml), GDP-Im/Na<sup>+</sup> (**5a**) (12 mg, 250 mOD, 0.022 mmol) and ZnCl<sub>2</sub> (24 mg, 0.176 mmol) yielding 6.74 mg

of **1k** ammonium salt (202 mOD, 0.0090 mmol, 41%). Reaction time: 24h.

<sup>1</sup>H NMR (500 MHz, D<sub>2</sub>O) δ = 9.43 (s, 1H), 8.15 (s, 1H), 7.35 – 7.29 (m, 1H), 7.21 – 7.13 (m, 2H), 5.95 (d, *J* = 3.7 Hz, 1H), 5.79 (d, *J* = 5.7 Hz, 1H), 5.55 (s, 2H), 4.67 (t, *J* = 5.7 Hz, 1H), 4.65 (dd, *J* = 4.9, 3.7 Hz, 1H, overlapped with 4.67 (t)), 4.50 (t, *J* = 4.9 Hz, 1H), 4.47 (dd, *J* = 5.7, 3.5 Hz, 1H, overlapped with 4.50 (t)), 4.42 – 4.37 (m, 2H), 4.31 – 4.20 (m, 4H);

<sup>31</sup>P NMR (202 MHz, D<sub>2</sub>O) δ = -10.04 – -10.69 (m, 2P), -21.63 – -22.66 (m, 1P);

<sup>19</sup>F NMR (471 MHz, D<sub>2</sub>O) δ = -137.58 – -137.71 (m, 1F), -138.23 – -138.35 (m, 1F);

<sup>19</sup>F NMR {1H} (471 MHz, D<sub>2</sub>O) δ = -137.65 (d, *J* = 21.4 Hz, 1F), -138.29 (d, *J* = 21.4 Hz, 1F);

HRMS ESI (-) calcd. *m/z* for C<sub>27</sub>H<sub>30</sub>F<sub>2</sub>N<sub>10</sub>O<sub>18</sub>P<sub>3</sub><sup>-</sup> [M-H]<sup>-</sup>: 913.09259, found 913.09409

### 1l) Synthesis of 4-CF<sub>3</sub>-Bn-GpppG

P1-(7-(4-trifluoromethylbenzyl)guanosin-5'-yl) P3-5'-guanosine

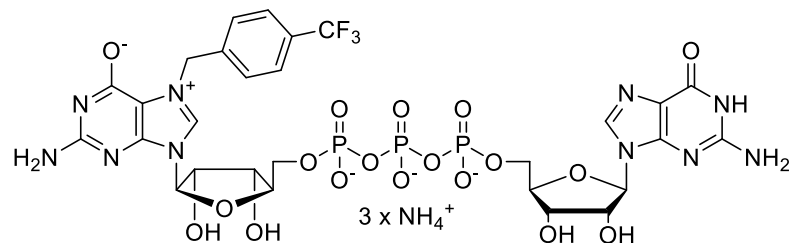

4-CF<sub>3</sub>-Bn<sup>7</sup>GpppG (**1l**) was prepared according to GP-B starting from 4-CF<sub>3</sub>-Bn<sup>7</sup>GMP/TEA<sup>+</sup> (**4l**) (10 mg, 54.2 mOD, 0.0048 mmol), DMSO (1.0 ml), GDP-Im/Na<sup>+</sup> (**5a**) (2 mg, 45.6 mOD, 0.004 mmol) and ZnCl<sub>2</sub> (14 mg, 0.10 mmol) yielding 1.5 mg of

**1l** ammonium salt (29.4 mOD, 0.0013 mmol, 27%). Reaction time: 24h.

<sup>1</sup>H NMR (500 MHz, D<sub>2</sub>O) δ 8.01 (s, 1H), 7.63 (d, *J* = 8.2 Hz, 2H), 7.53 (d, *J* = 8.2 Hz, 2H), 5.96 (d, *J* = 4.3 Hz, 1H), 5.75 (d, *J* = 5.7 Hz, 1H), 5.70 (d, *J* = 15.4 Hz, 1H), 5.67 (d, *J* = 15.4 Hz, 1H), 4.68 (t, *J* = 5.7 Hz, 1H), 4.67 (t, *J* = 4.3 Hz, 1H, overlapped with 4.68 (t)), 4.50 (t, *J* = 5.0 Hz, 1H), 4.48 – 4.43 (m, 1H), 4.42 – 4.36 (m, 2H), 4.32 – 4.17 (m, 4H);

<sup>31</sup>P NMR (202 MHz, D<sub>2</sub>O) δ -10.15 – -10.78 (m), -22.20 (t, *J* = 19.7 Hz); <sup>19</sup>F NMR (471 MHz, D<sub>2</sub>O) δ -62.49.

HRMS ESI (-) calcd. *m/z* for C<sub>28</sub>H<sub>31</sub>F<sub>3</sub>N<sub>10</sub>O<sub>18</sub>P<sub>3</sub><sup>-</sup> [M-H]<sup>-</sup>: 945.09882, found 945.09990

**1m) Synthesis of 4-COOH-Bn<sup>7</sup>GpppG**

P1-(7-(4-carboxylbenzyl)guanosin-5'-yl) P3-5'-guanosine

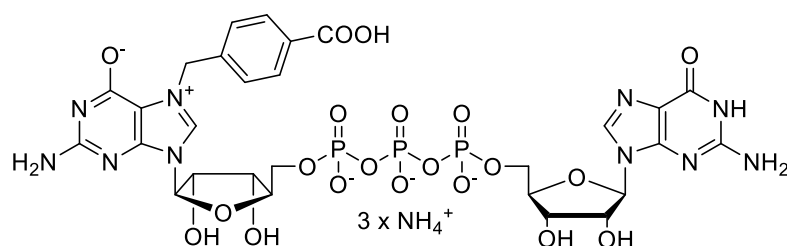

4-CO<sub>2</sub>H-Bn<sup>7</sup>GpppG (**1m**) was prepared according to GP-B starting from 4-CO<sub>2</sub>H-Bn<sup>7</sup>GMP/TEA<sup>+</sup> (**4m**) (38 mg, 500 mOD, 0.046 mmol), DMSO (10.0 ml), GDP-Im/Na<sup>+</sup> (**5a**) (23 mg, 500 mOD, 0.043 mmol) and ZnCl<sub>2</sub> (47 mg, 0.344 mmol) yielding

10.68 mg of **1m** ammonium salt (222 mOD, 0.010 mmol, 22%). Reaction time: 24h.

<sup>1</sup>H NMR (500 MHz, D<sub>2</sub>O) δ = 9.49 (s, 1H), 8.15 (s, 1H), 7.71 (d, *J* = 8.4 Hz, 2H), 7.32 (d, *J* = 8.4 Hz, 2H), 5.96 (d, *J* = 3.5 Hz, 1H), 5.75 (d, *J* = 5.4 Hz, 1H), 5.64 (d, *J* = 15.3 Hz, 1H), 5.59 (d, *J* = 15.3 Hz, 1H), 4.67 (dd, *J* = 5.0, 3.5 Hz, 1H), 4.61 (t, *J* = 5.4 Hz, 1H), 4.52 (t, *J* = 5.0 Hz, 1H), 4.45 (dd, *J* = 5.4, 3.5 Hz, 1H), 4.43 – 4.39 (m, 2H), 4.33 – 4.20 (m, 4H);

<sup>31</sup>P NMR (202 MHz, D<sub>2</sub>O) δ = -10.24 – -10.61 (m, 2P), -22.06 (t, *J* = 19.2 Hz, 1P)

HRMS ESI (-) calcd. *m/z* for C<sub>28</sub>H<sub>32</sub>N<sub>10</sub>O<sub>20</sub>P<sub>3</sub><sup>-</sup> [M-H]<sup>-</sup>: 921.10127, found 921.10277

**1n) Synthesis of 4-NO<sub>2</sub>-Bn<sup>7</sup>GpppG**

P1-(7-(4-nitrobenzyl)guanosin-5'-yl) P3-5'-guanosine

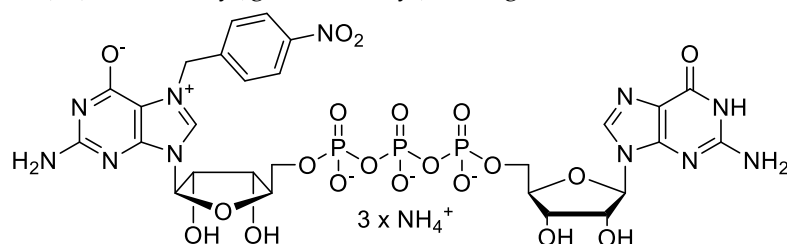

4-NO<sub>2</sub>H-Bn<sup>7</sup>GpppG (**1n**) was prepared according to GP-B starting from 4-NO<sub>2</sub>H-Bn<sup>7</sup>GMP/TEA<sup>+</sup> (**4n**) (86 mg, 500 mOD, 0.046 mmol), DMSO (8.0 ml), GDP-Im/Na<sup>+</sup> (**5a**) (23 mg, 500 mOD, 0.043 mmol) and ZnCl<sub>2</sub> (47 mg, 0.344 mmol) yielding 19.46 mg

of **1n** ammonium salt (426 mOD, 0.019 mmol, 43%). Reaction time: 24h.

<sup>1</sup>H NMR (500 MHz, D<sub>2</sub>O) δ = 9.55 (s, 1H), 8.13 (s, 1H), 8.07 (d, *J* = 8.8 Hz, 2H), 7.54 (d, *J* = 8.8 Hz, 2H), 5.97 (d, *J* = 3.6 Hz, 1H), 5.75 (d, *J* = 5.4 Hz, 2H), 5.74 (d, *J* = 15.4 Hz, 1H), 5.70 (d, *J* = 15.4 Hz, 1H), 4.67 (dd, *J* = 4.9, 3.6 Hz, 1H), 4.65 (t, *J* = 5.4 Hz, 2H), 4.51 (t, *J* = 4.9 Hz, 1H), 4.45 (dd, *J* = 5.4, 3.4 Hz, 1H), 4.43 – 4.38 (m, 2H), 4.33 – 4.18 (m, 4H).

<sup>31</sup>P NMR (202 MHz, D<sub>2</sub>O) δ = -10.22 – -10.63 (m, 2P), -22.10 (t, *J* = 19.6 Hz, 1P)

HRMS ESI (-) calcd. *m/z* for C<sub>27</sub>H<sub>31</sub>N<sub>11</sub>O<sub>20</sub>P<sub>3</sub><sup>-</sup> [M-H]<sup>-</sup>: 922.09652, found 922.09742

### 1o) Synthesis of $\alpha$ -Naphm<sup>7</sup>GpppG

P1-(7-(1-methylnaphthalene)guanosin-5'-yl) P3-5'-guanosine

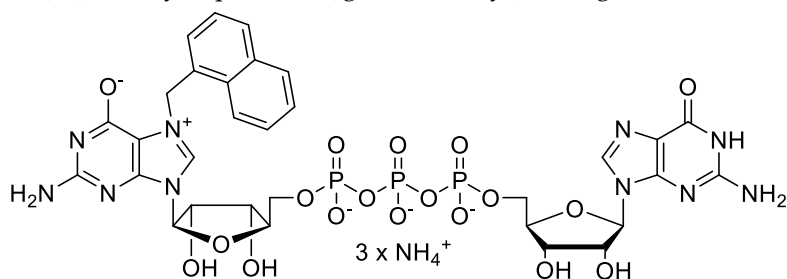

$\alpha$ -Mn<sup>7</sup>GpppG (**1o**) was prepared according to GP-B starting from  $\alpha$ -Mn<sup>7</sup>GMP/TEA<sup>+</sup> (**4o**) (40 mg, 1000 mOD, 0.098 mmol), DMSO (10.0 ml), GDP-Im/Na<sup>+</sup> (**5a**) (46 mg, 1000 mOD, 0.086 mmol) and ZnCl<sub>2</sub> (72 mg, 0.528 mmol) yielding 44.00 mg of **1o** ammonium salt (1129 mOD, 0.050 mmol, 57%).

Reaction time: 24h.

<sup>1</sup>H NMR (500 MHz, D<sub>2</sub>O)  $\delta$  = 9.25 (s, 1H), 7.98 (s, 1H), 7.88 (d,  $J$  = 8.0 Hz, 1H), 7.65 (dd,  $J$  = 15.2, 8.0 Hz, 2H), 7.50 (t,  $J$  = 7.5 Hz, 1H), 7.41 (t,  $J$  = 7.5 Hz, 1H), 7.29 (t,  $J$  = 7.5 Hz, 1H), 7.19 (d,  $J$  = 7.5 Hz, 1H), 5.85 (q,  $J$  = 15.2 Hz, 2H), 5.82 (d,  $J$  = 3.7 Hz, 1H), 5.65 (d,  $J$  = 5.3 Hz, 1H), 4.58 (t,  $J$  = 3.7 Hz, 1H), 4.53 (t,  $J$  = 5.3 Hz, 1H), 4.48 (t,  $J$  = 5.3 Hz, 1H), 4.46 – 4.42 (m, 1H), 4.40 – 4.18 (m, 6H).

<sup>31</sup>P NMR (202 MHz, D<sub>2</sub>O)  $\delta$  =  $\delta$  -10.47 (m, 2P), -22.06 (m, 2P).

HRMS ESI (-) calcd.  $m/z$  for C<sub>31</sub>H<sub>34</sub>N<sub>10</sub>O<sub>18</sub>P<sub>3</sub><sup>3-</sup> [M-H]<sup>-</sup> : 927.12709, found 927.12841

### 1p) Synthesis of $\beta$ -Naphm<sup>7</sup>GpppG

P1-(7-(2-methylnaphthalene)guanosin-5'-yl) P3-5'-guanosine

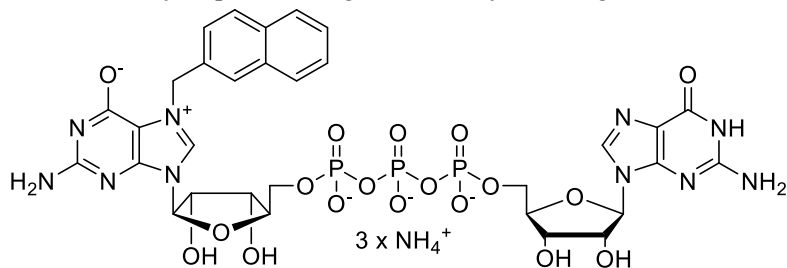

$\beta$ -Mn<sup>7</sup>GpppG (**1p**) was prepared according to GP-B starting from  $\beta$ -Mn<sup>7</sup>GMP/TEA<sup>+</sup> (**4p**) (67 mg, 250 mOD, 0.023 mmol), DMSO (8.0 ml), GDP-Im/Na<sup>+</sup> (**5a**) (12 mg, 250 mOD, 0.022 mmol) and ZnCl<sub>2</sub> (24 mg, 0.176 mmol) yielding 6.71 mg of **1p** ammonium salt (223 mOD, 0.010 mmol, 45%). Reaction

time: 24h.

<sup>1</sup>H NMR (500 MHz, D<sub>2</sub>O)  $\delta$  = 9.49 (s, 1H), 8.02 (s, 1H), 7.64 (s, 1H), 7.56 – 7.50 (m, 3H), 7.34 – 7.27 (m, 3H), 5.82 (d,  $J$  = 3.8 Hz, 1H), 5.62 (d,  $J$  = 5.0 Hz, 1H), 5.53 (s, 2H), 4.59 (dd,  $J$  = 5.0, 3.7 Hz, 1H), 4.51 (dd,  $J$  = 3.8, 5.0 Hz, 1H), 4.48 (dd,  $J$  = 5.0, 5.0 Hz, 1H), 4.46 – 4.39 (m, 3H), 4.36 – 4.21 (m, 4H);

<sup>31</sup>P NMR (202 MHz, D<sub>2</sub>O)  $\delta$  = -10.10 – -10.53 (m, 2P), -21.95 (t,  $J$  = 19.3 Hz, 1P)

HRMS ESI (-) calcd.  $m/z$  for C<sub>31</sub>H<sub>34</sub>N<sub>10</sub>O<sub>18</sub>P<sub>3</sub><sup>3-</sup> [M-H]<sup>-</sup> : 927.12709, found 927.12850

**1q) Synthesis of Bn<sup>7</sup>G<sub>mp</sub>pppG**

P1-(2'-O-methyl-7-benzylguanosin-5'-yl) P3-5'-guanosine

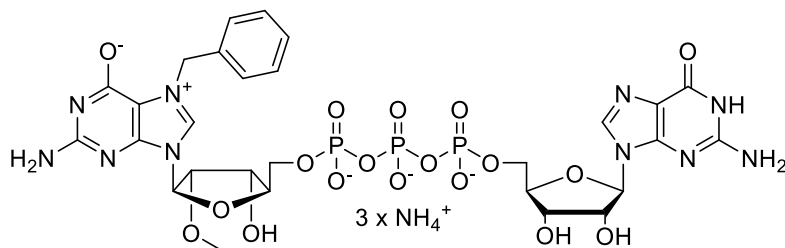

Bn<sup>7,2'</sup>-OMeGpppG (**1q**) was prepared according to GP-B starting from Bn<sup>7,2'</sup>-OMeGMP/TEA<sup>+</sup> (**4q**) (250 mg, 500 mOD, 0.044 mmol), DMSO (8.0 ml), GDP-Im/Na<sup>+</sup> (**5a**) (23 mg, 500 mOD, 0.043 mmol) and ZnCl<sub>2</sub> (71 mg, 0.516 mmol) yielding 16.26 mg of

**1q** ammonium salt (328 mOD, 0.015 mmol, 33%). Reaction time: 24h.

<sup>1</sup>H NMR (500 MHz, D<sub>2</sub>O) δ = 9.33 (s, 1H), 8.04 (s, 1H), 7.39 – 7.25 (m, 5H), 5.93 (d, *J* = 2.8 Hz, 1H), 5.74 (d, *J* = 5.7 Hz, 1H), 5.56 (s, 2H), 4.64 (t, *J* = 5.7 Hz, 1H), 4.55 (dd, *J* = 6.3, 5.0 Hz, 1H), 4.45 (dd, *J* = 5.0, 3.0 Hz, 1H), 4.43 – 4.40 (m, 1H), 4.27 (dd, *J* = 5.0, 2.8 Hz, 1H, overlapped with 4.35 – 4.19 (m)), 4.35 – 4.19 (m, 5H), 3.59 (s, 3H);

<sup>31</sup>P NMR (202 MHz, D<sub>2</sub>O) δ = -10.37 – -10.69 (m, 2P), -22.13 (t, *J* = 19.3 Hz, 1P)

HRMS ESI (-) calcd. *m/z* for C<sub>28</sub>H<sub>34</sub>N<sub>10</sub>O<sub>18</sub>P<sub>3</sub><sup>-</sup> [M-H]<sup>-</sup> : 891.12709, found 891.12836

**1r) Synthesis of 4-Cl-Bn<sup>7</sup>G<sub>mp</sub>pppG**

P1-(2'-O-methyl-7-(4-chlorobenzyl)guanosin-5'-yl) P3-5'-guanosine

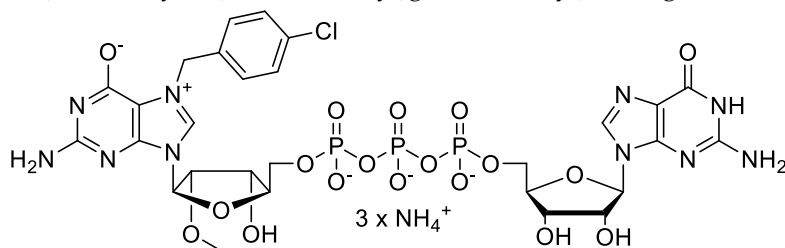

4-Cl-Bn<sup>7,2'</sup>-OMeGpppG (**1r**) was prepared according to GP-B starting from 4-Cl-Bn<sup>7,2'</sup>-OMeGMP/TEA<sup>+</sup> (**4r**) (104 mg, 500 mOD, 0.046 mmol), DMSO (10.0 ml), GDP-Im/Na<sup>+</sup> (**5a**) (23 mg, 500 mOD, 0.043 mmol) and ZnCl<sub>2</sub> (47 mg, 0.344 mmol) yielding

14.75 mg of **1r** ammonium salt (420 mOD, 0.019 mmol, 42%). Reaction time: 24h.

<sup>1</sup>H NMR (500 MHz, D<sub>2</sub>O) δ = 9.43 (s, 1H), 8.25 (s, 1H), 7.28 (d, *J* = 8.5 Hz, 2H), 7.18 (d, *J* = 8.5 Hz, 2H), 6.00 (d, *J* = 2.7 Hz, 1H), 5.78 (d, *J* = 5.3 Hz, 1H), 5.52 (s, 2H), 4.63 (t, *J* = 5.3 Hz, 1H), 4.58 (dd, *J* = 6.4, 5.0 Hz, 1H), 4.45 (dd, *J* = 5.0, 4.2 Hz, 1H), 4.42 (dd, *J* = 4.2, 2.7 Hz, 1H), 4.37 – 4.19 (m, 6H), 3.59 (s, 3H);

<sup>31</sup>P NMR (202 MHz, D<sub>2</sub>O) δ = -10.24 – -10.63 (m, 2P), -22.04 (t, *J* = 19.2 Hz, 1P)

HRMS ESI (-) calcd. *m/z* for C<sub>28</sub>H<sub>33</sub>ClN<sub>10</sub>O<sub>18</sub>P<sub>3</sub><sup>-</sup> [M-H]<sup>-</sup> : 925.08812, found 925.08957

S4. Spectroscopic data:  $^1\text{H}$ ,  $^{31}\text{P}$ ,  $^{19}\text{F}$  NMR, HRMS and UV/VIS spectra

| Bn <sup>7</sup> GpppG (1a)       |                                                                                                                                                              |
|----------------------------------|--------------------------------------------------------------------------------------------------------------------------------------------------------------|
| Structure                        | 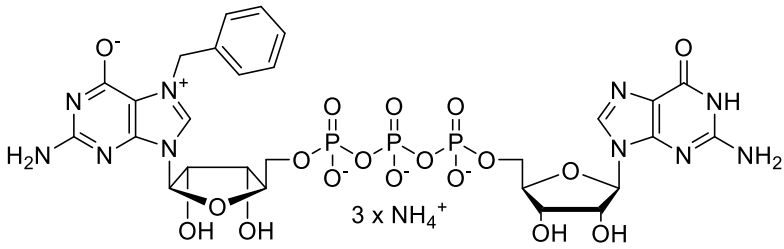                                                                           |
| Reaction RP HPLC Profile         |  <p>DAD1 A, Sig=254,4 Ref=360,100 (RAD\2017-12-2114-24-54BN7GPPPG.D)</p>  |
| Purified Product RP HPLC Profile |  <p>DAD1 A, Sig=254,4 Ref=360,100 (RAD\2018-01-1710-28-25BN7GPPPG.D)</p> |

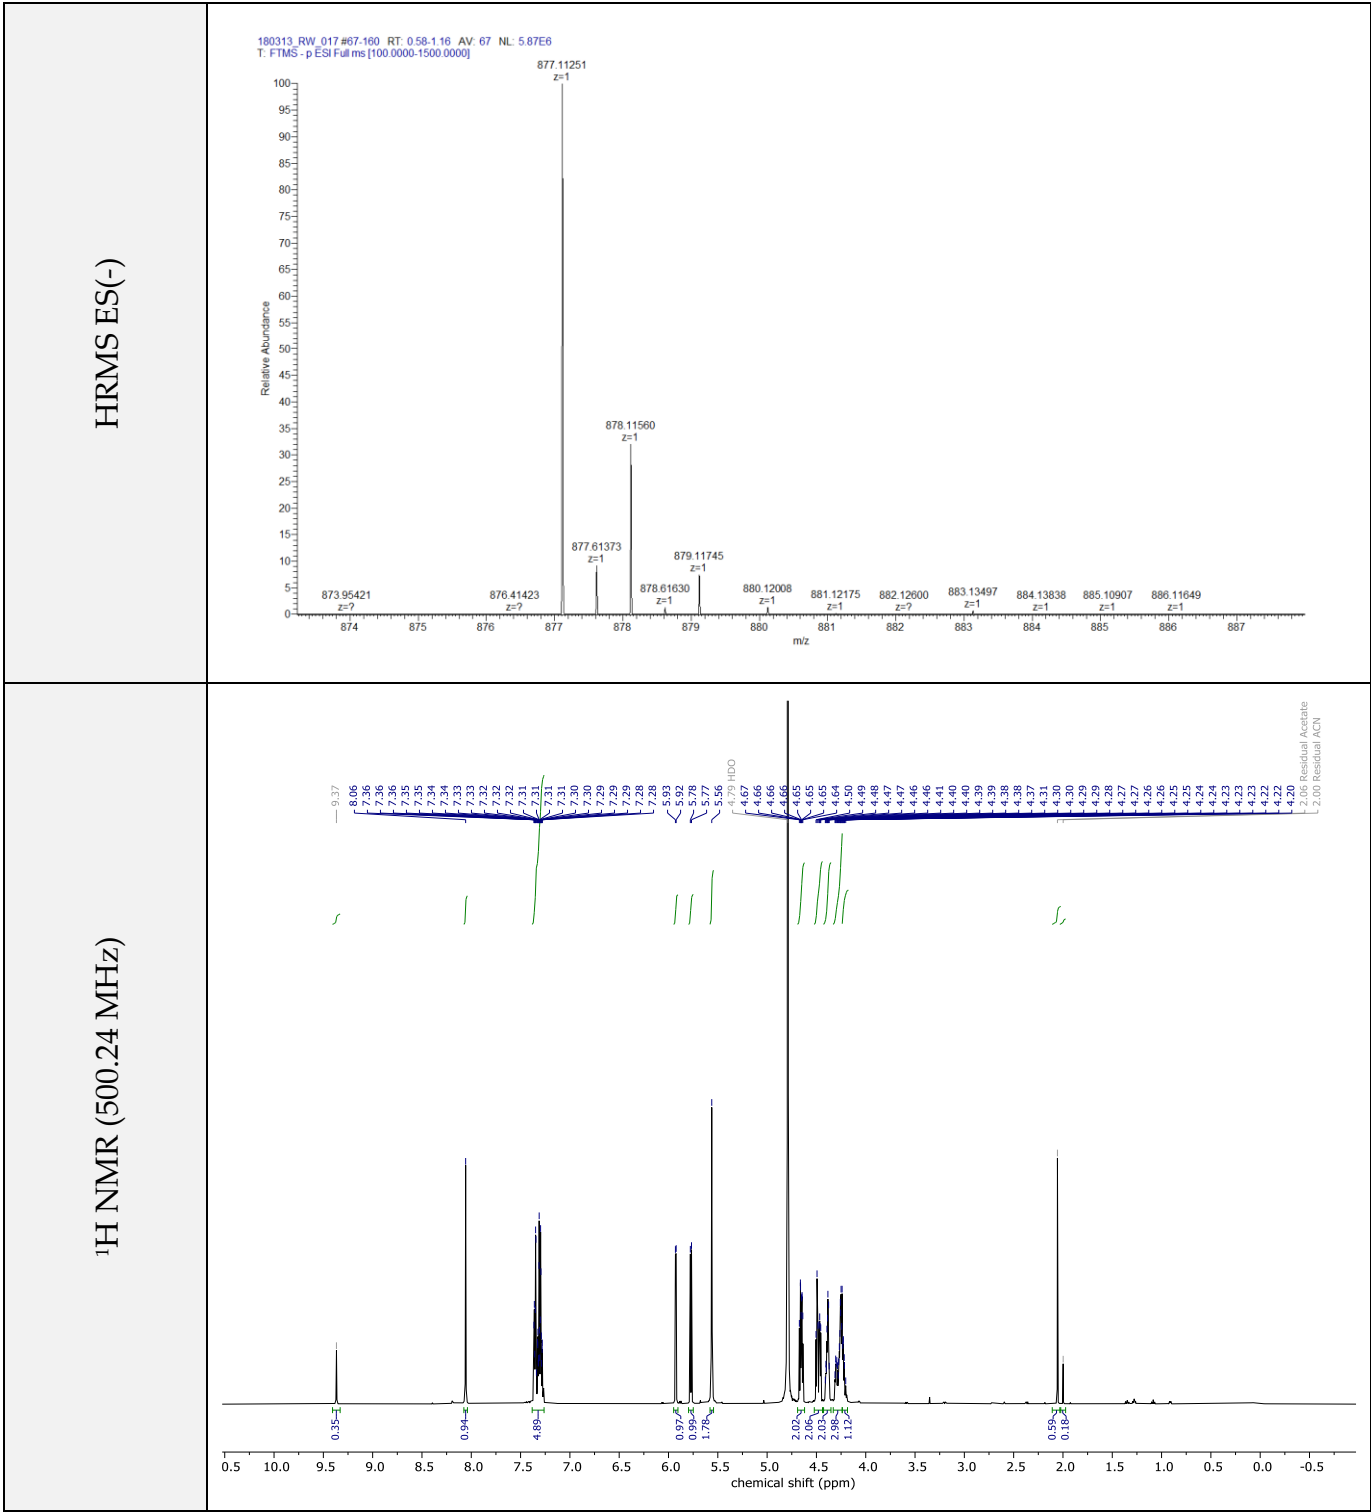

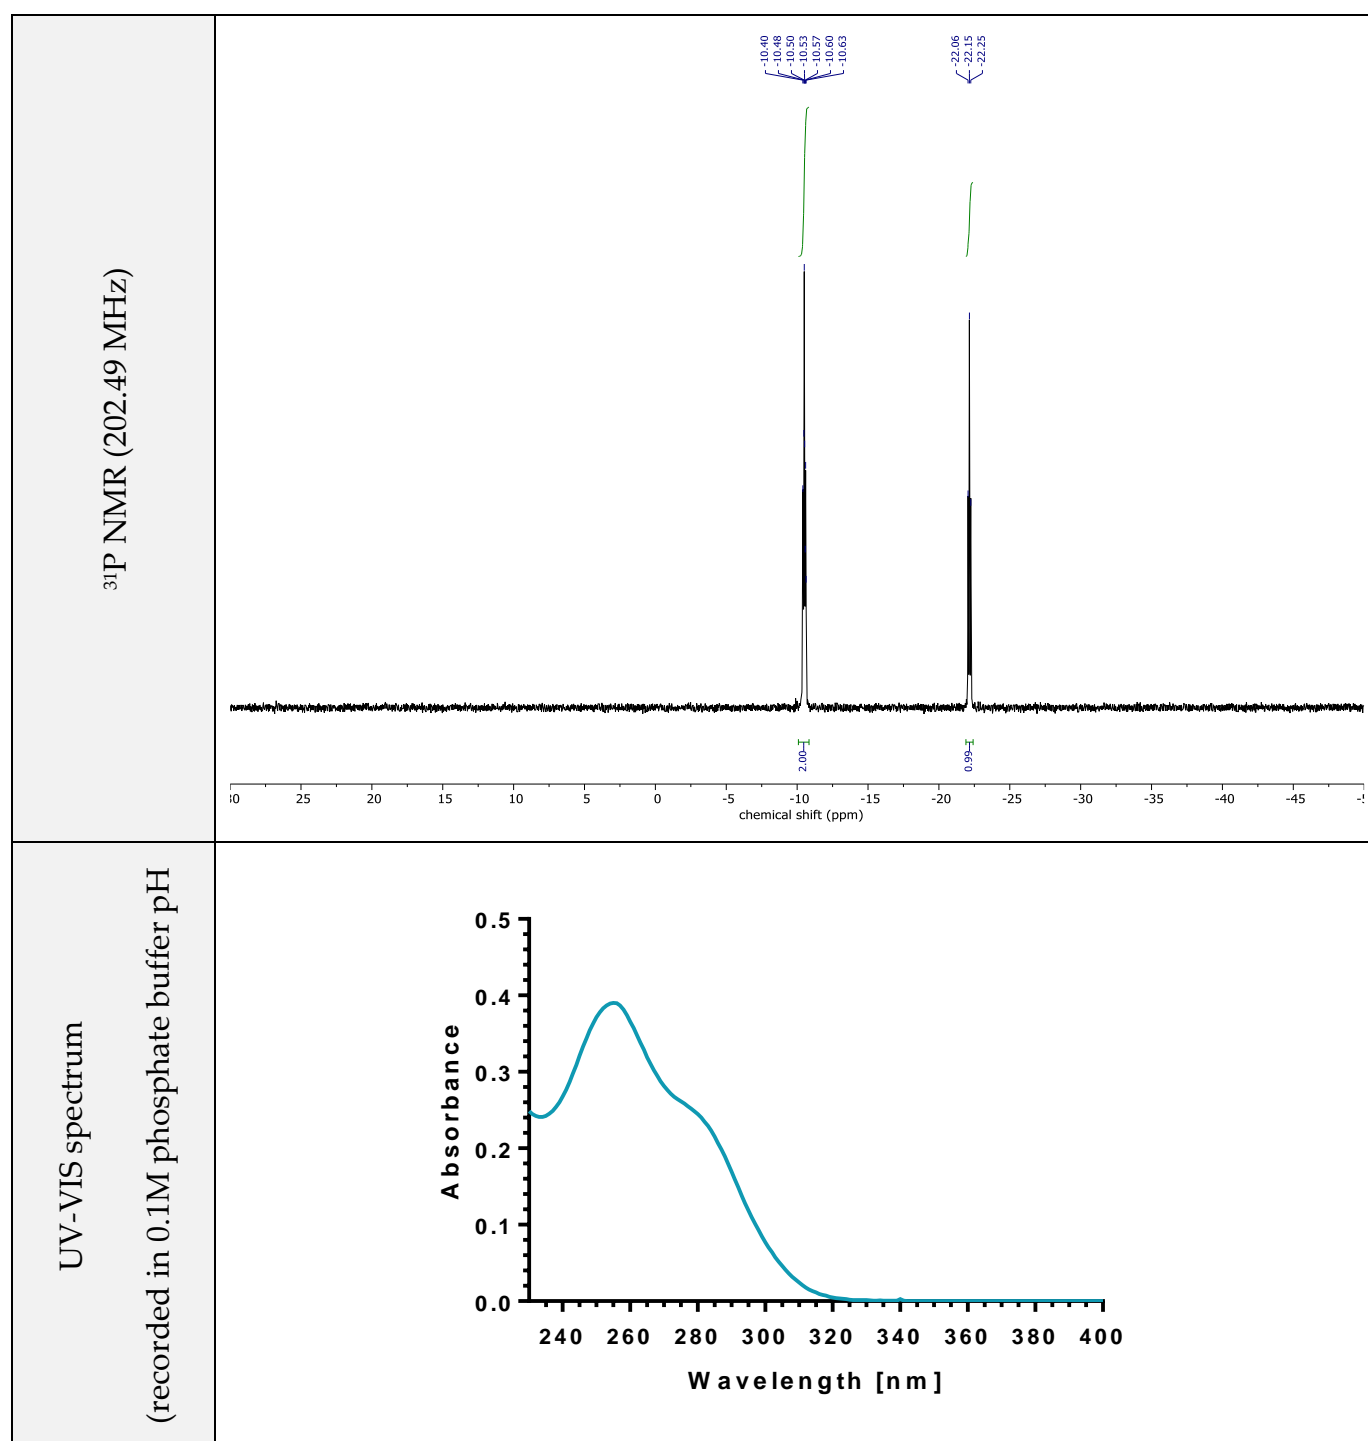

| 2-MeBn <sup>7</sup> GpppG (1b)   |                                                                                                              |
|----------------------------------|--------------------------------------------------------------------------------------------------------------|
| Structure                        |                                                                                                              |
| Reaction RP HPLC Profile         | <p>DAD1 A, Sig=254,4 Ref=360,100 (RAD\2018-03-0815-11-492-ME-BN7GPPPG.D)</p>                                 |
| Purified Product RP HPLC Profile | <p>DAD1 A, Sig=254,4 Ref=360,100 (RAD\2017-07-0410-43-142-ME-BN7GPPPG.D)</p>                                 |
| HRMS ES(-)                       | <p>171213_RW_005 #15-09 RT: 0.13-0.60 AV: 55 NL: 1.66E6<br/>T: FTMS - p ESI Full ms [150.0000-2000.0000]</p> |



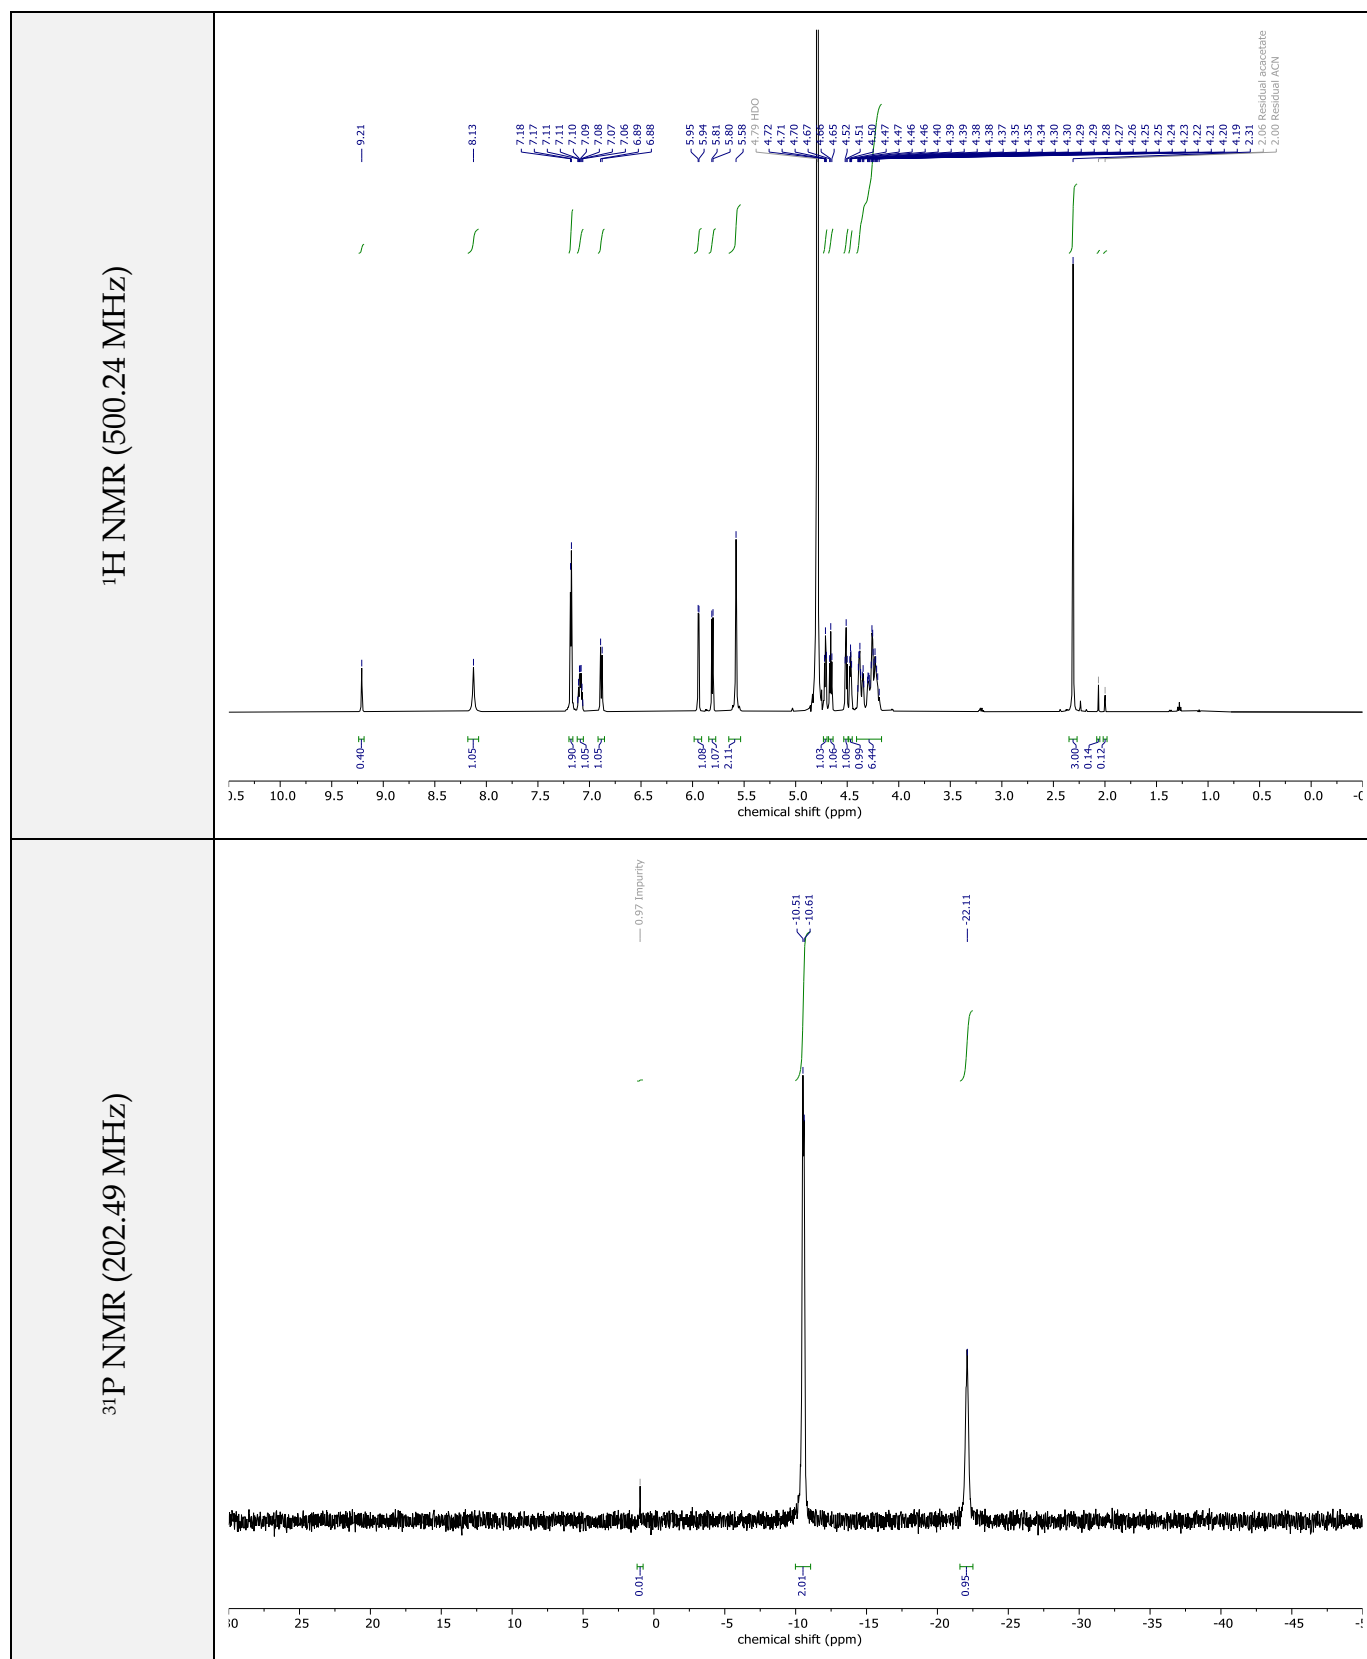

## UV-VIS spectrum

(recorded in 0.1M phosphate buffer pH

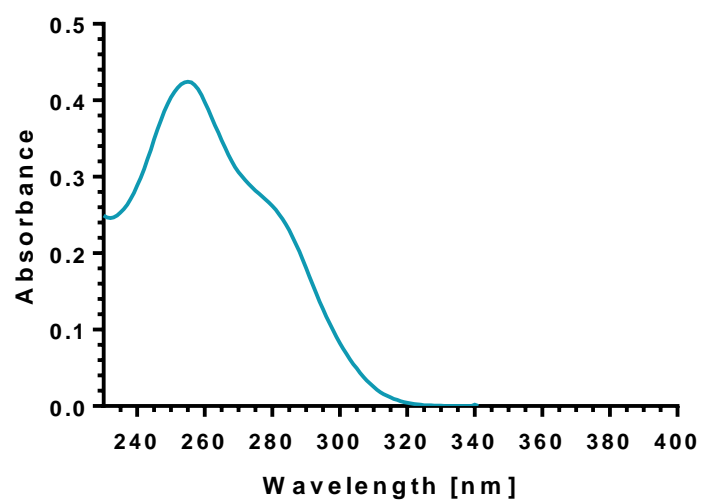

| 3-MeBn <sup>7</sup> GpppG (1c)   |                                                                                                                                                                                                    |
|----------------------------------|----------------------------------------------------------------------------------------------------------------------------------------------------------------------------------------------------|
| Structure                        | 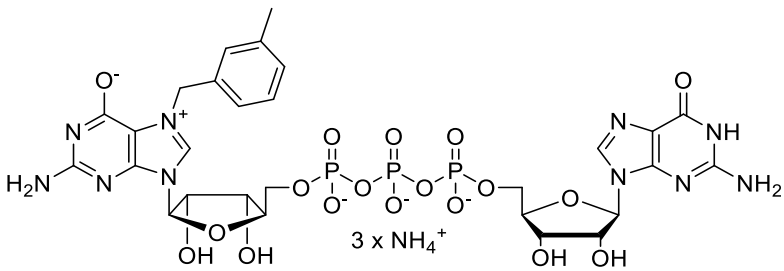                                                                                                                 |
| Reaction RP HPLC Profile         |  <p>DAD1 A, Sig=254,4 Ref=360,100 (RAD\2018-03-0813-14-493-ME-BN7GPPPG.D)</p>                                    |
| Purified Product RP HPLC Profile |  <p>DAD1 A, Sig=254,4 Ref=360,100 (RAD\2017-07-0611-23-483-ME-BN7GPPPG.D)</p>                                  |
| HRMS ES(-)                       |  <p>171213_RW_006 #22-130 RT: 0.19-1.13 AV: 109 NL: 1.70E6<br/>T: FTMS -p ESI Full ms [150.0000-2000.0000]</p> |

$^1\text{H}$  NMR (500.24 MHz)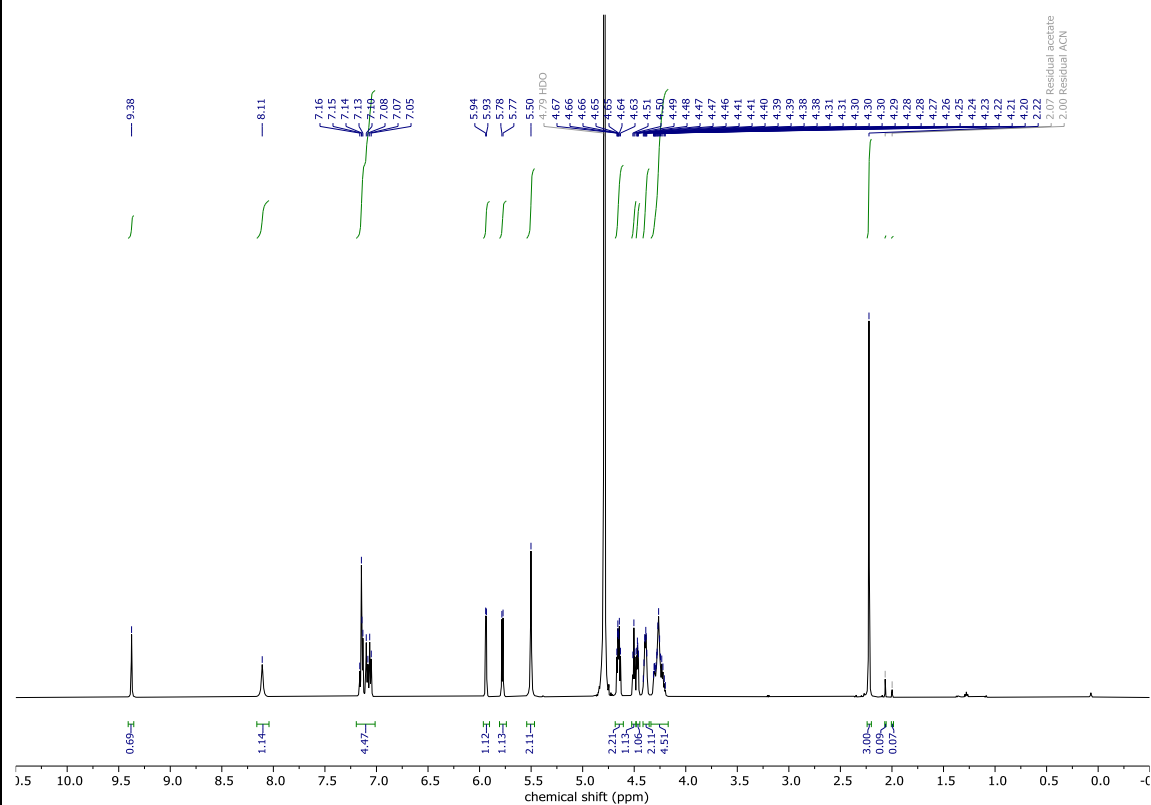 $^{31}\text{P}$  NMR (202.49 MHz)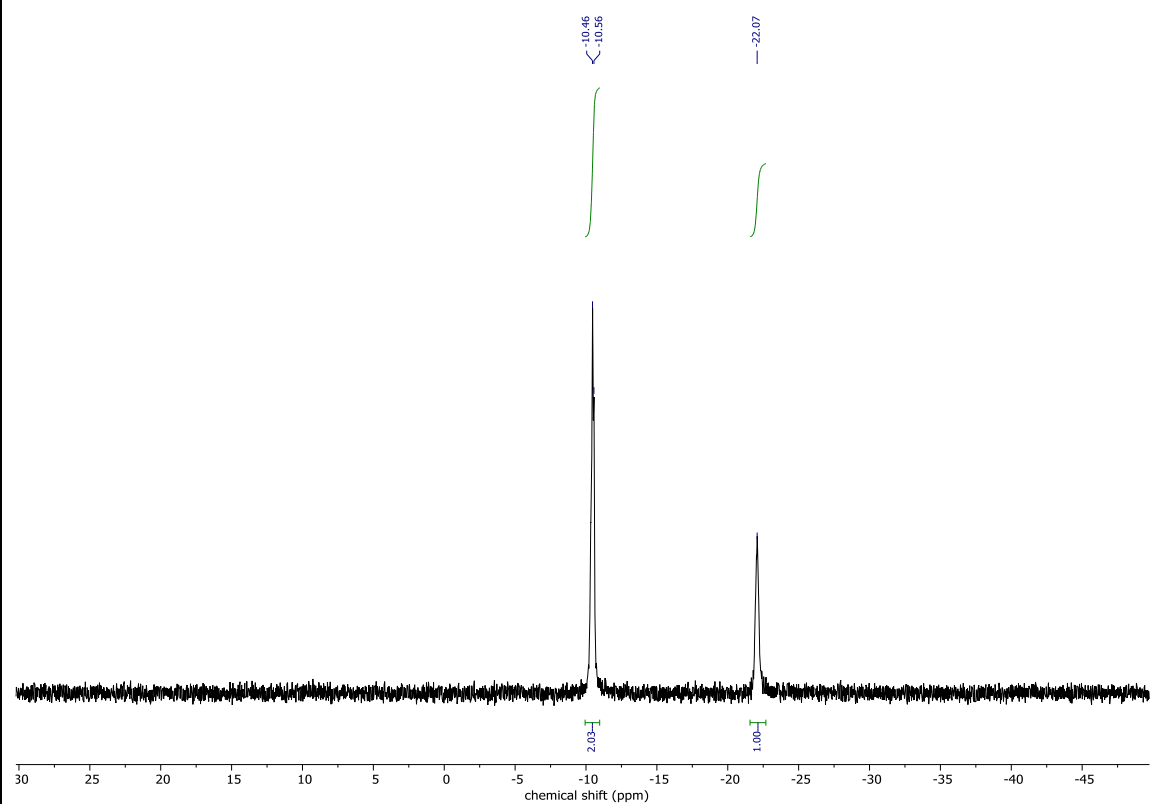

## UV-VIS spectrum

(recorded in 0.1M phosphate buffer pH 7.0)

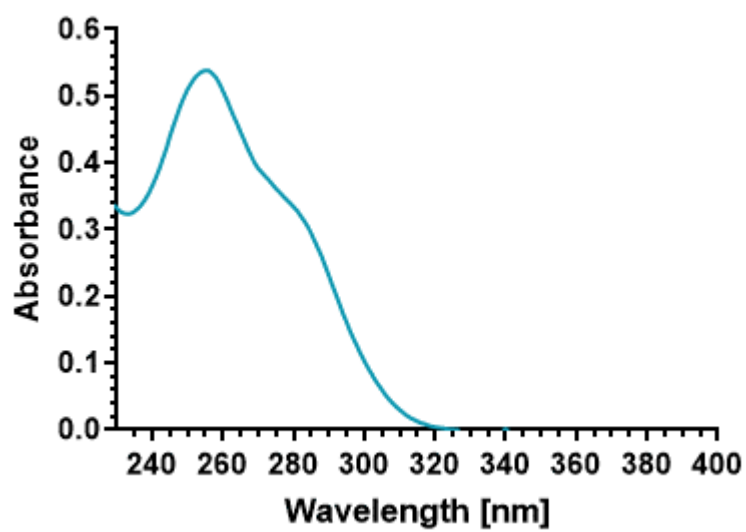

| 4-MeBn <sup>7</sup> GpppG (1d)   |                                                                                                                                                                                                  |
|----------------------------------|--------------------------------------------------------------------------------------------------------------------------------------------------------------------------------------------------|
| Structure                        | 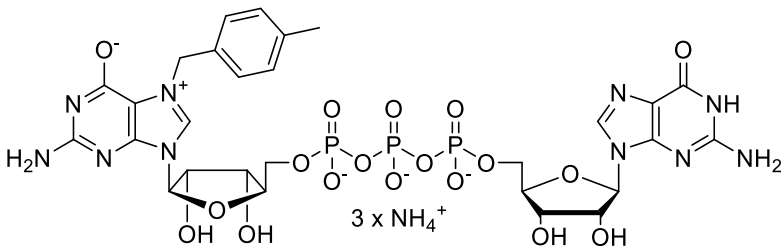                                                                                                               |
| Reaction RP HPLC Profile         |  <p>DAD1 A, Sig=254,4 Ref=360,100 (RAD\2018-03-0915-42-184-ME-BN7GPPPG.D)</p>                                  |
| Purified Product RP HPLC Profile |  <p>DAD1 A, Sig=254,4 Ref=360,100 (RAD\2017-07-0609-55-174-ME-BN7GPPPG.D)</p>                                |
| HRMS ES(-)                       |  <p>171213_RW_007 #6-55 RT: 0.05-0.48 AV: 50 NL: 1.70E6<br/>T: FTMS - p ESI Full ms [150.0000-2000.0000]</p> |

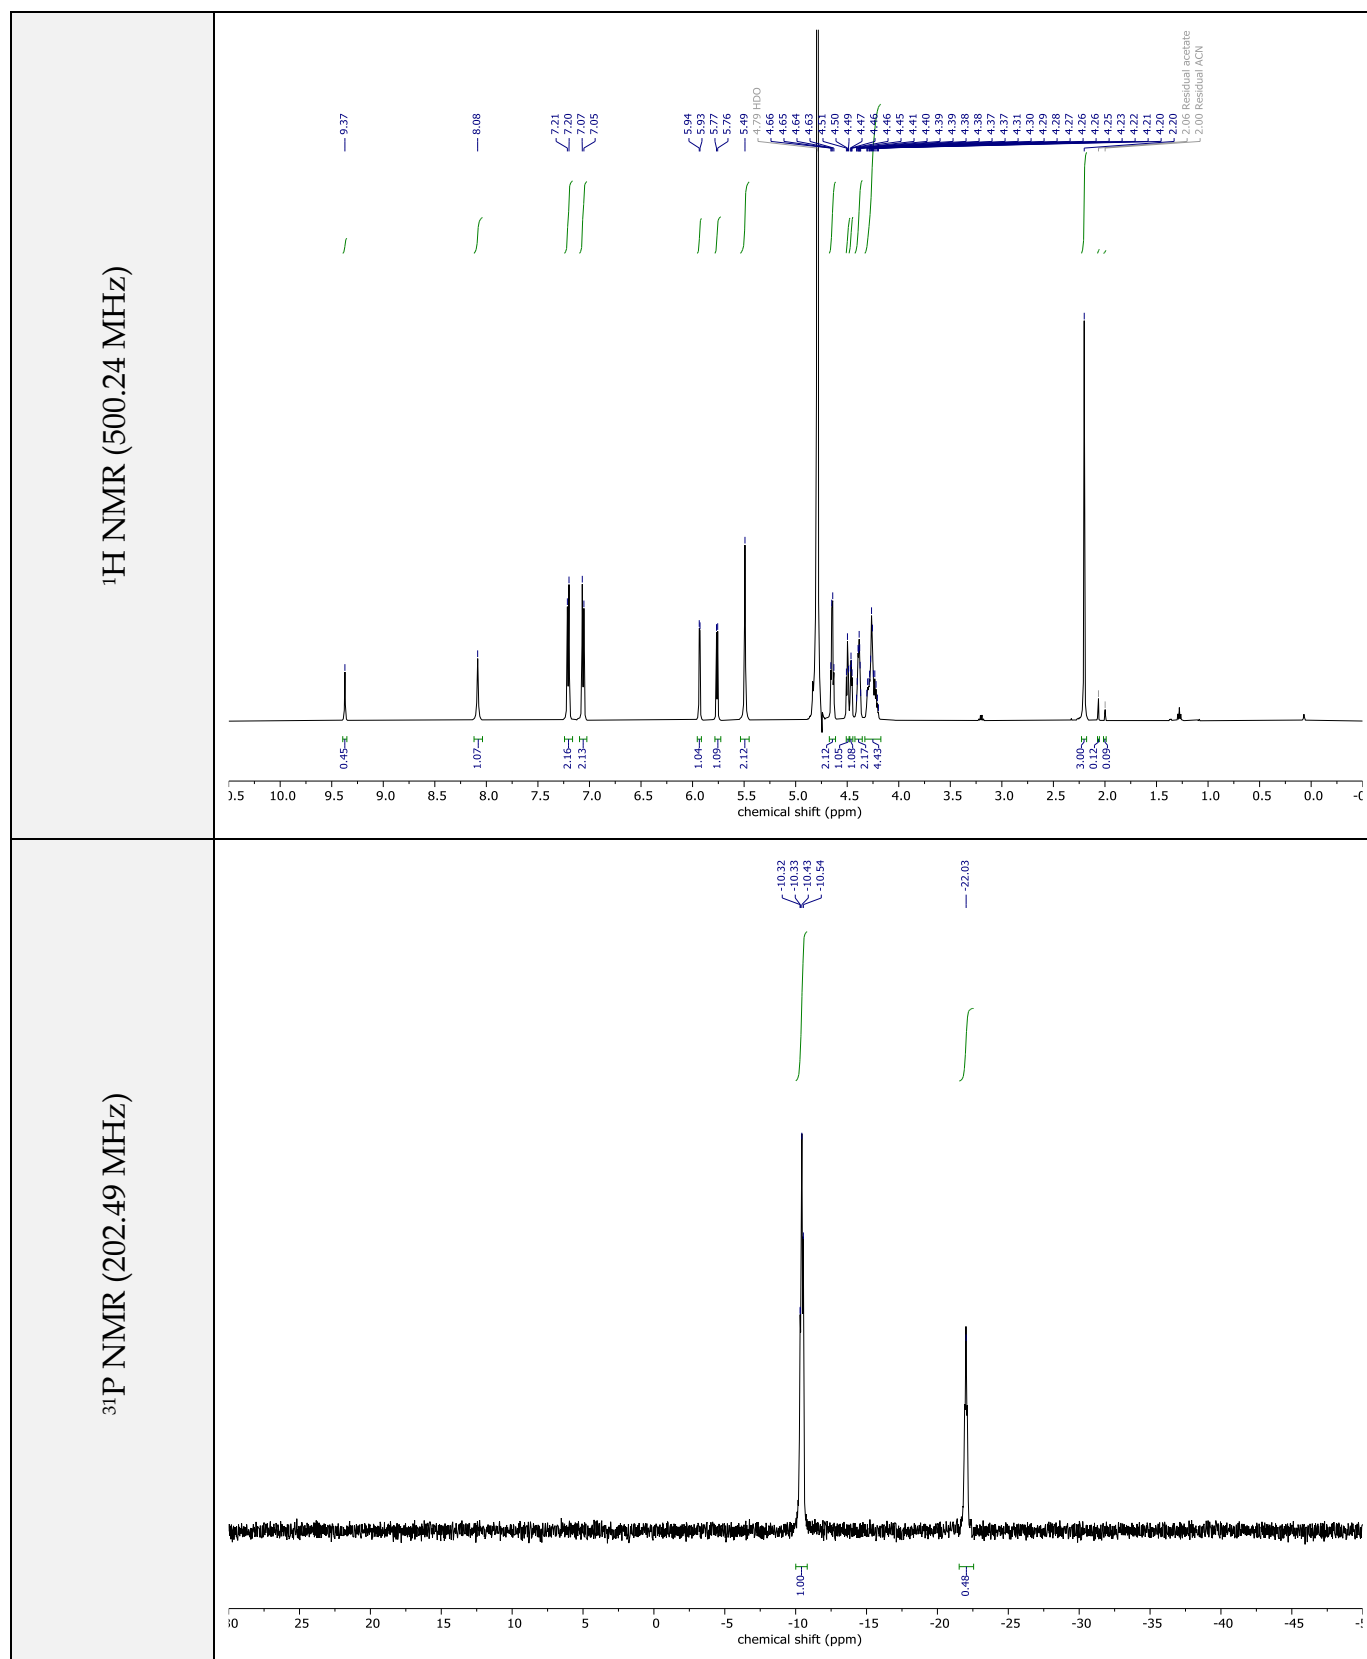

## UV-VIS spectrum

(recorded in 0.1M phosphate buffer pH 7.0)

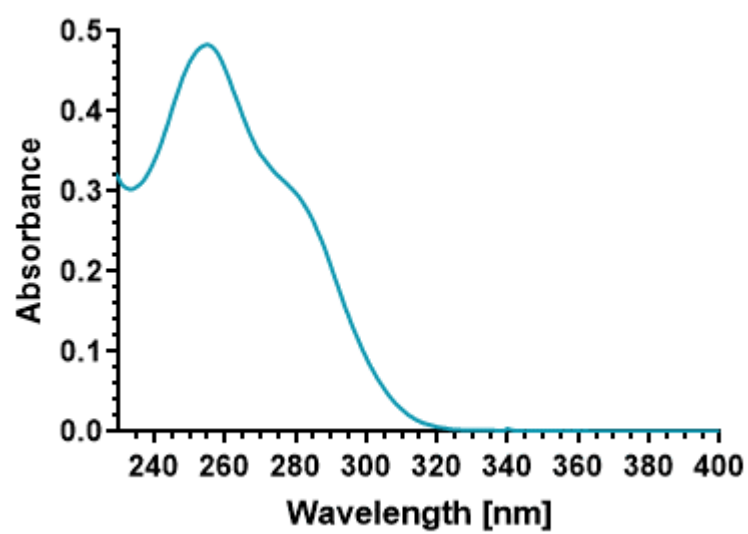



| 4- <i>i</i> PrBn <sup>7</sup> GpppG (1e) |                                                                                                                                                                                                    |
|------------------------------------------|----------------------------------------------------------------------------------------------------------------------------------------------------------------------------------------------------|
| Structure                                | 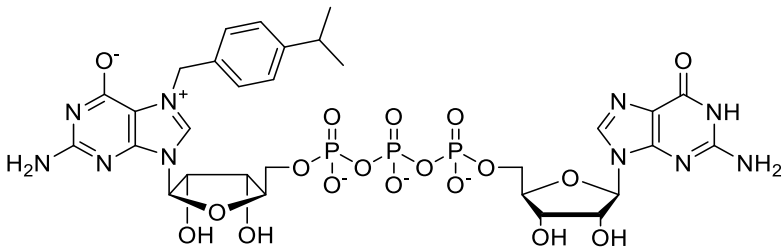                                                                                                                 |
| Reaction RP HPLC Profile                 |  <p>DAD1 A, Sig=254,4 Ref=360,100 (RAD\2018-03-1515-21-314-IPR-BN7GPPPG.D)</p>                                   |
| Purified Product RP HPLC Profile         |  <p>DAD1 A, Sig=254,4 Ref=360,100 (RAD\2017-07-0610-15-114-IPR-BN7GPPPG.D)</p>                                 |
| HRMS ES(-)                               |  <p>171213_RW_004 #39-102 RT: 0.35-0.90 AV: 64 NL: 7.69E6<br/>T: FTMS - p ESI Full ms [150.0000-2000.0000]</p> |

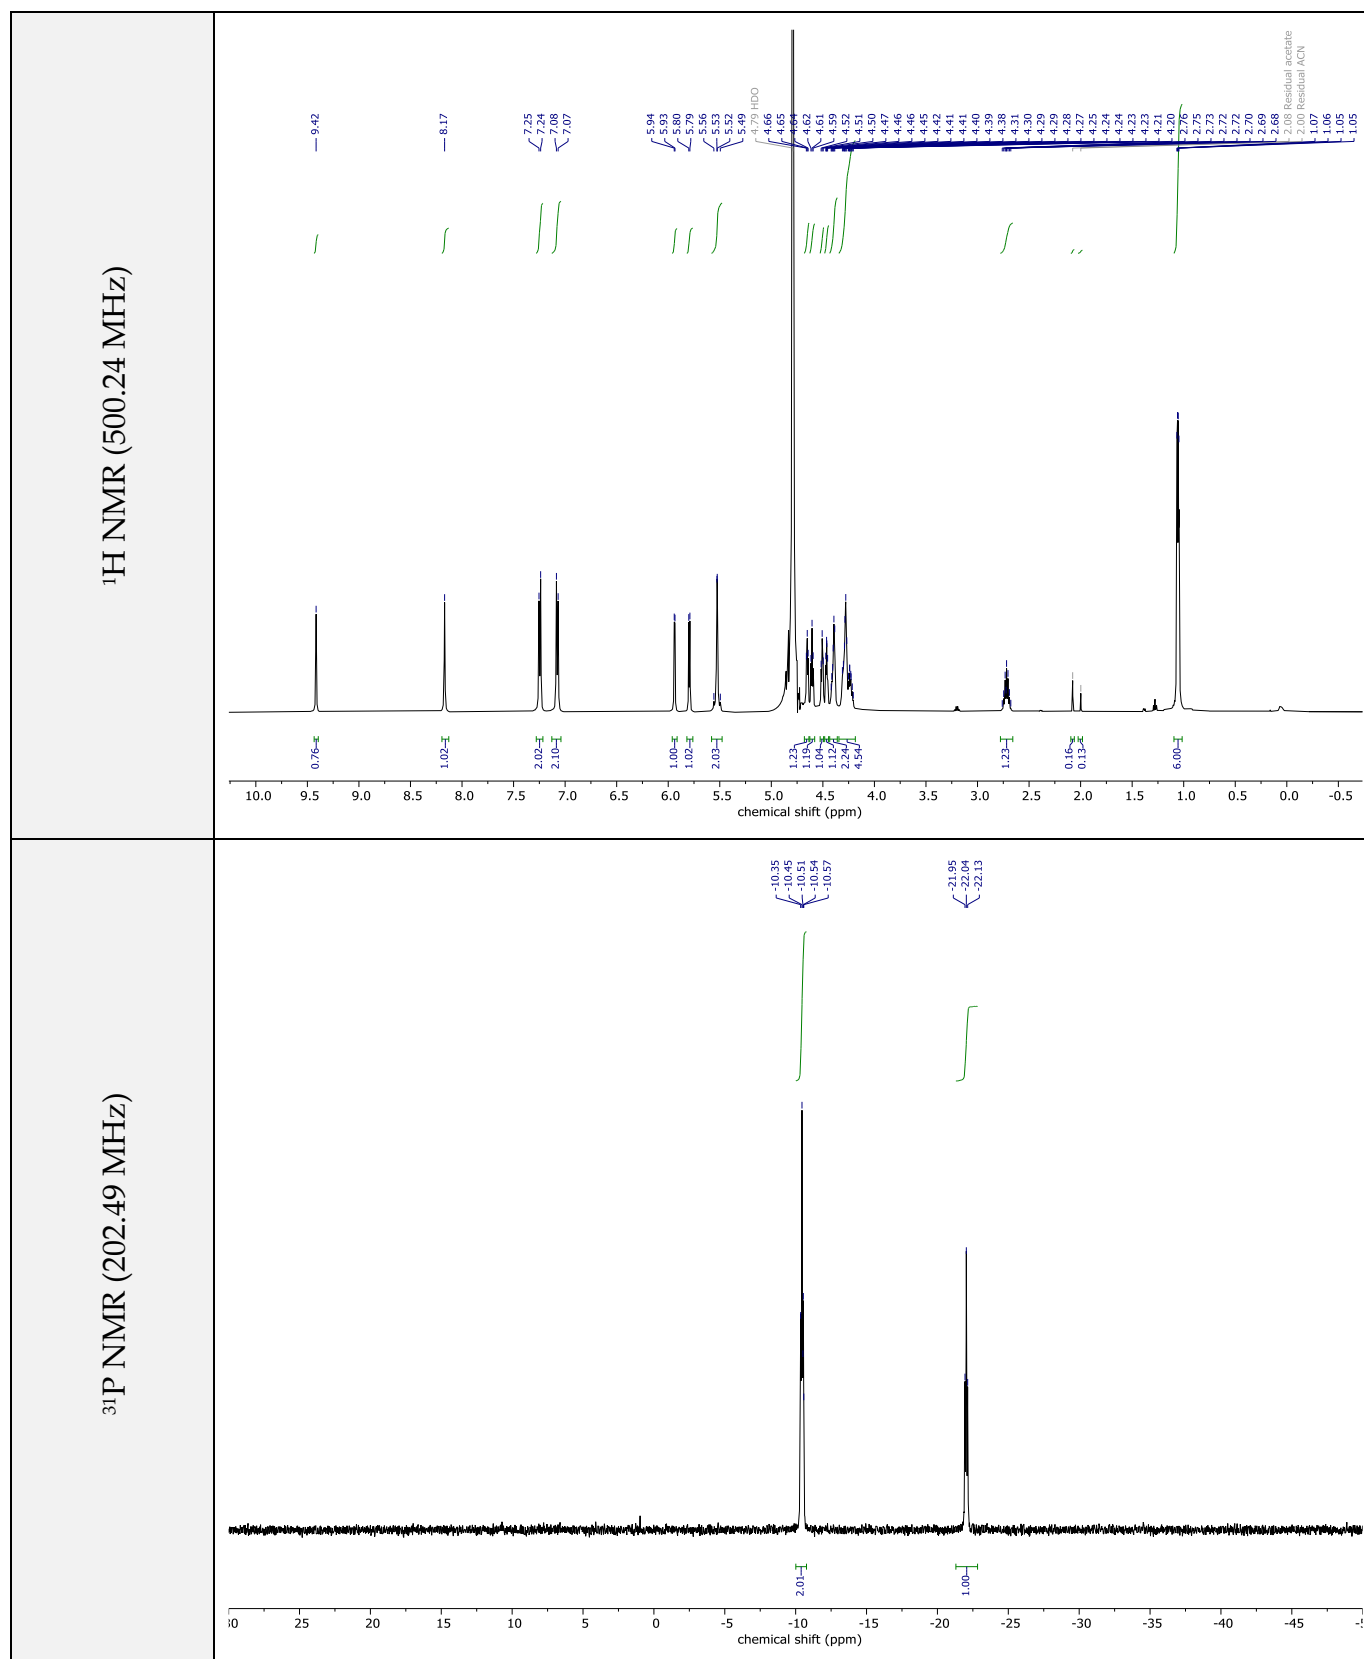

## UV-VIS spectrum

(recorded in 0.1M phosphate buffer pH 7.0)

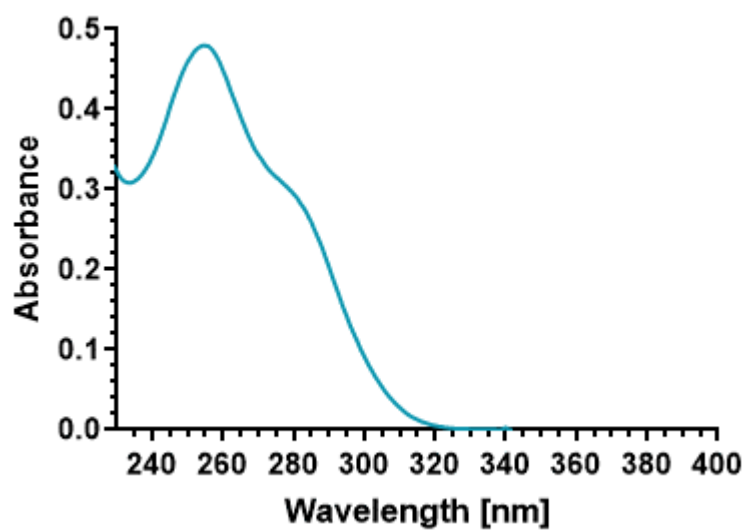

| 3,5-di-MeBn <sup>7</sup> GpppG (1f) |                                                                                      |
|-------------------------------------|--------------------------------------------------------------------------------------|
| Structure                           | 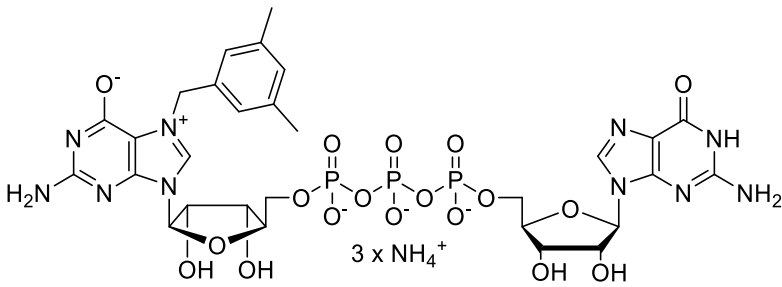   |
| Reaction RP HPLC Profile            |    |
| Purified Product RP HPLC Profile    |  |
| HRMS ES(-)                          |  |

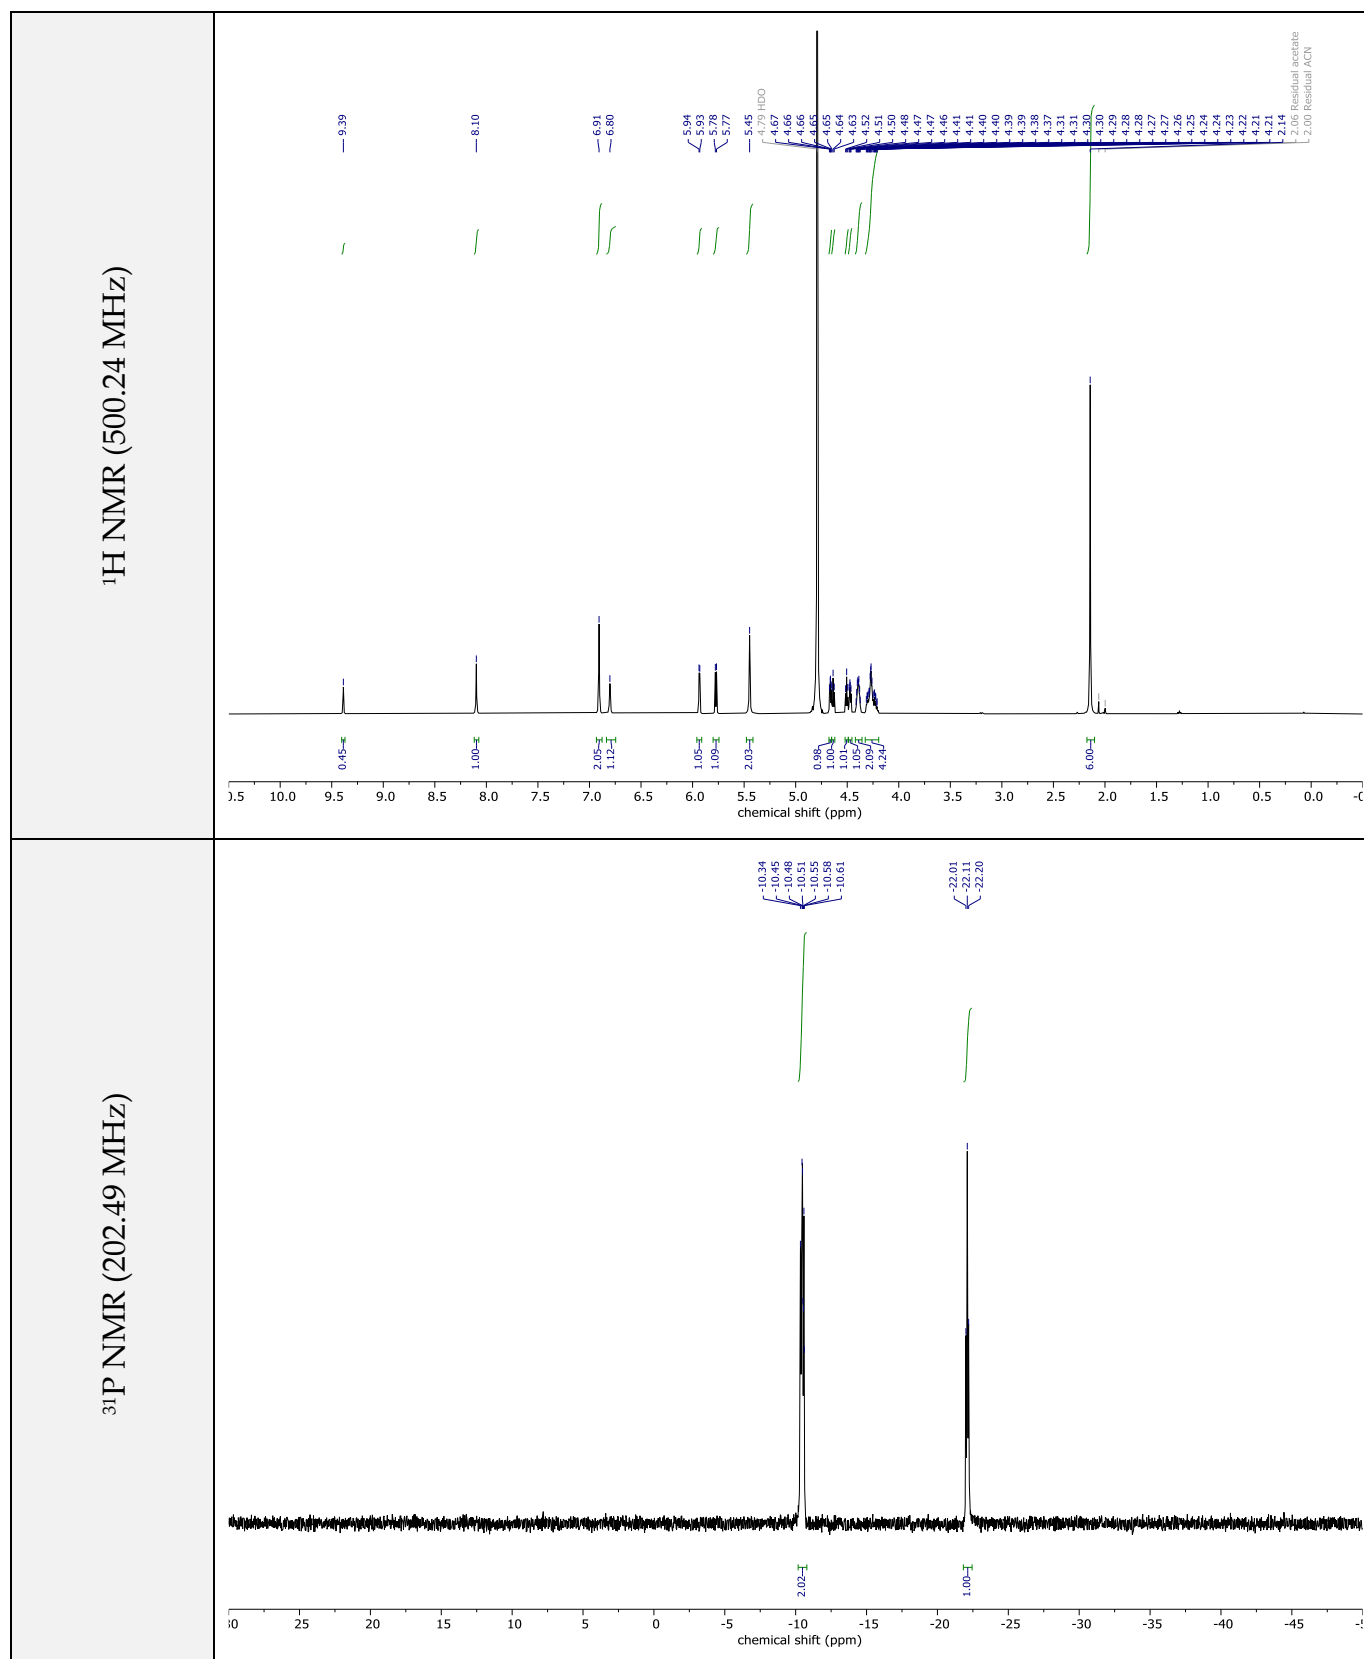

## UV-VIS spectrum

(recorded in 0.1M phosphate buffer pH

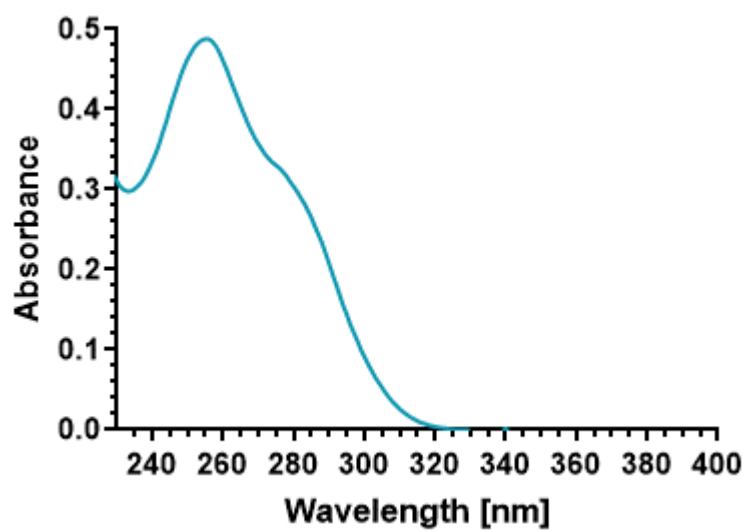

| 4-F-Bn <sup>7</sup> GpppG (1g)   |                                                                                                                                                                                                    |
|----------------------------------|----------------------------------------------------------------------------------------------------------------------------------------------------------------------------------------------------|
| Structure                        | 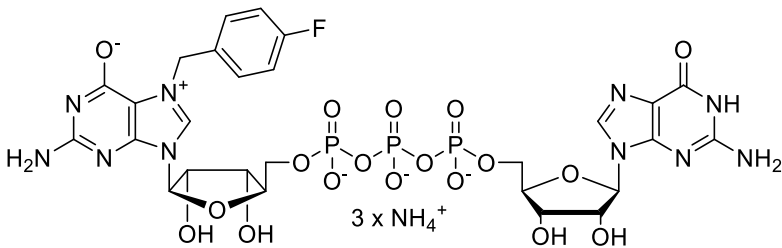                                                                                                                 |
| Reaction RP HPLC Profile         |  <p>DAD1 A, Sig=254,4 Ref=360,100 (RAD\2018-03-1515-42-094-F-BN7GPPPG.D)</p>                                     |
| Purified Product RP HPLC Profile |  <p>DAD1 A, Sig=254,4 Ref=360,100 (RAD\2017-12-0718-32-434-F-BN7GMP.D)</p>                                     |
| HRMS ES(-)                       |  <p>180110_RW_013 #10-108 RT: 0.09-0.94 AV: 99 NL: 9.08E6<br/>T: FTMS - p ESI Full ms [150.0000-2000.0000]</p> |

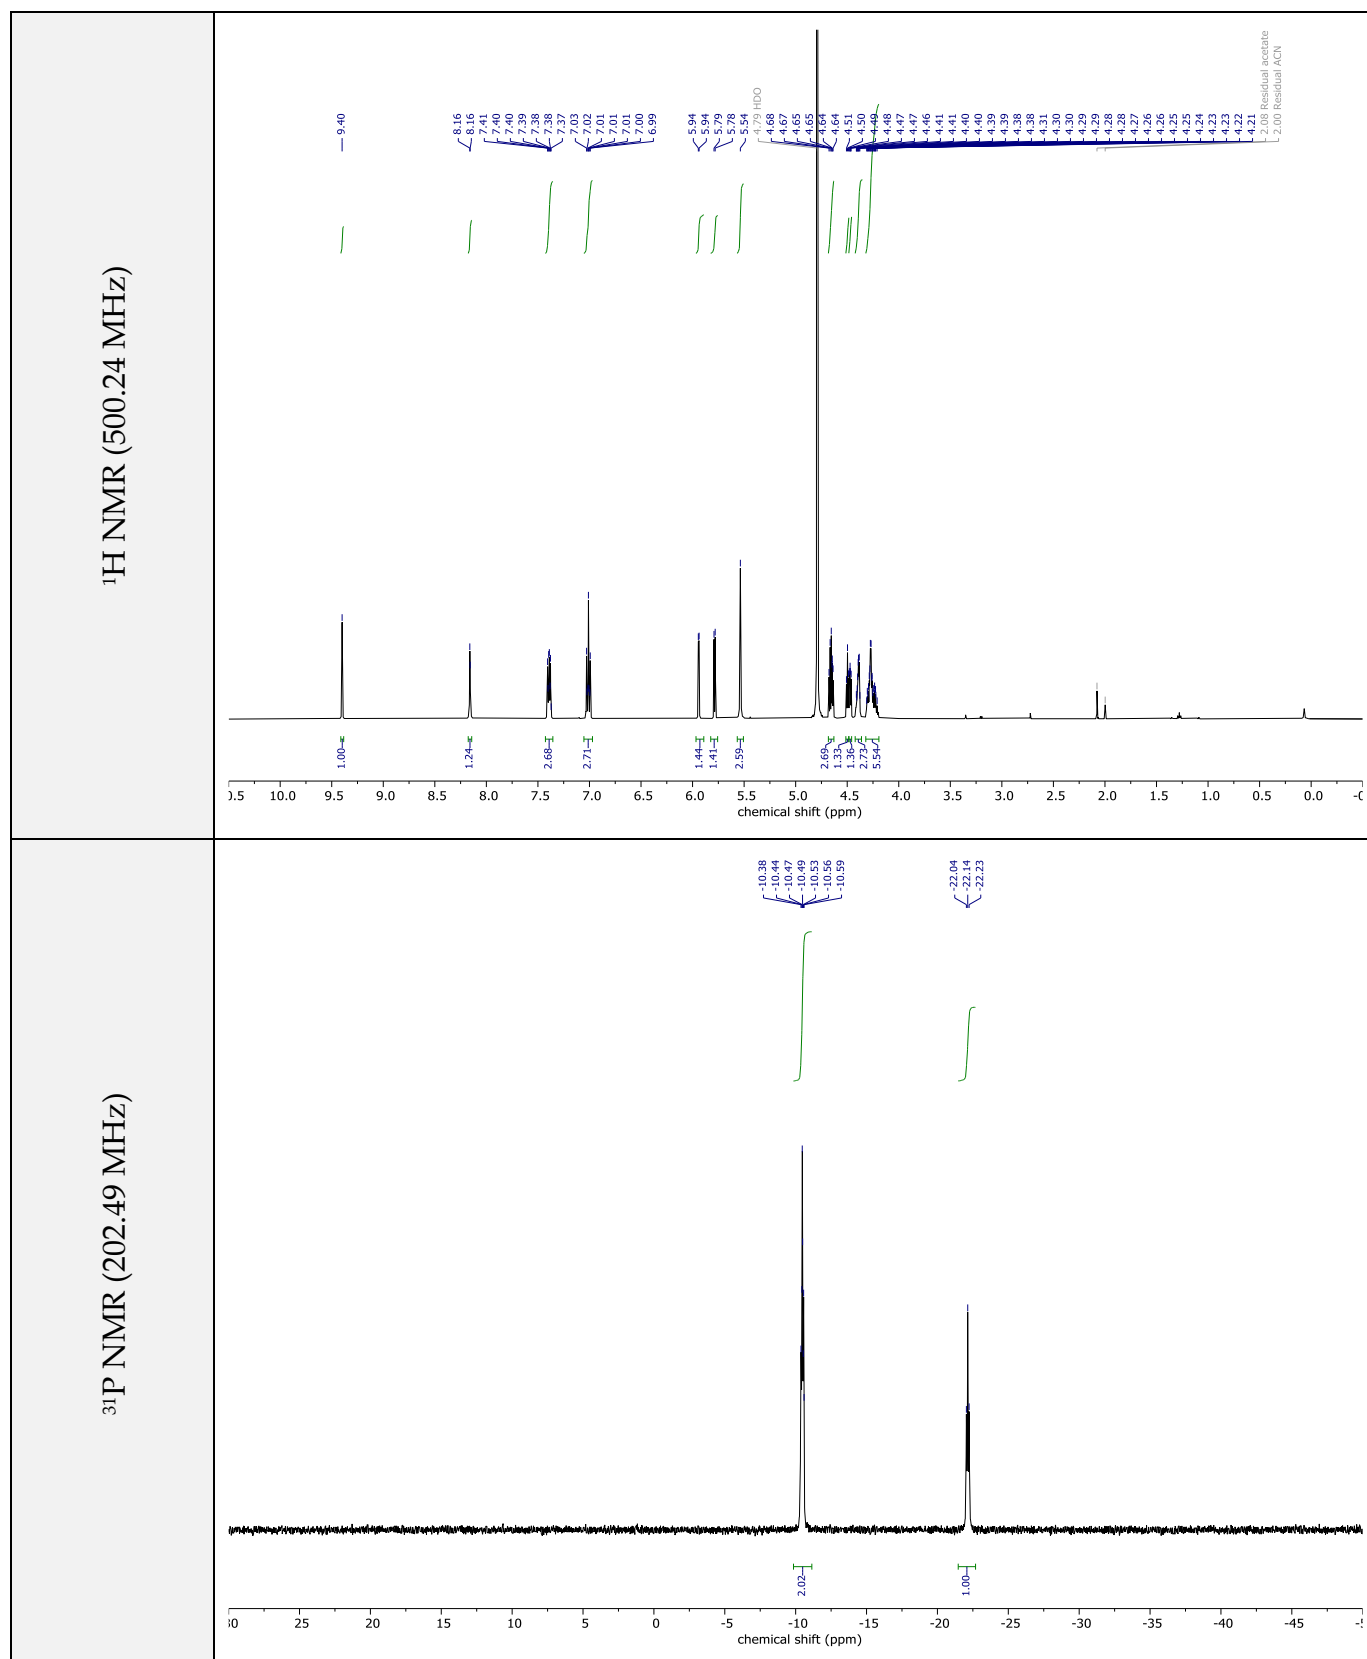



$^{19}\text{F}$  NMR (470.65 MHz)

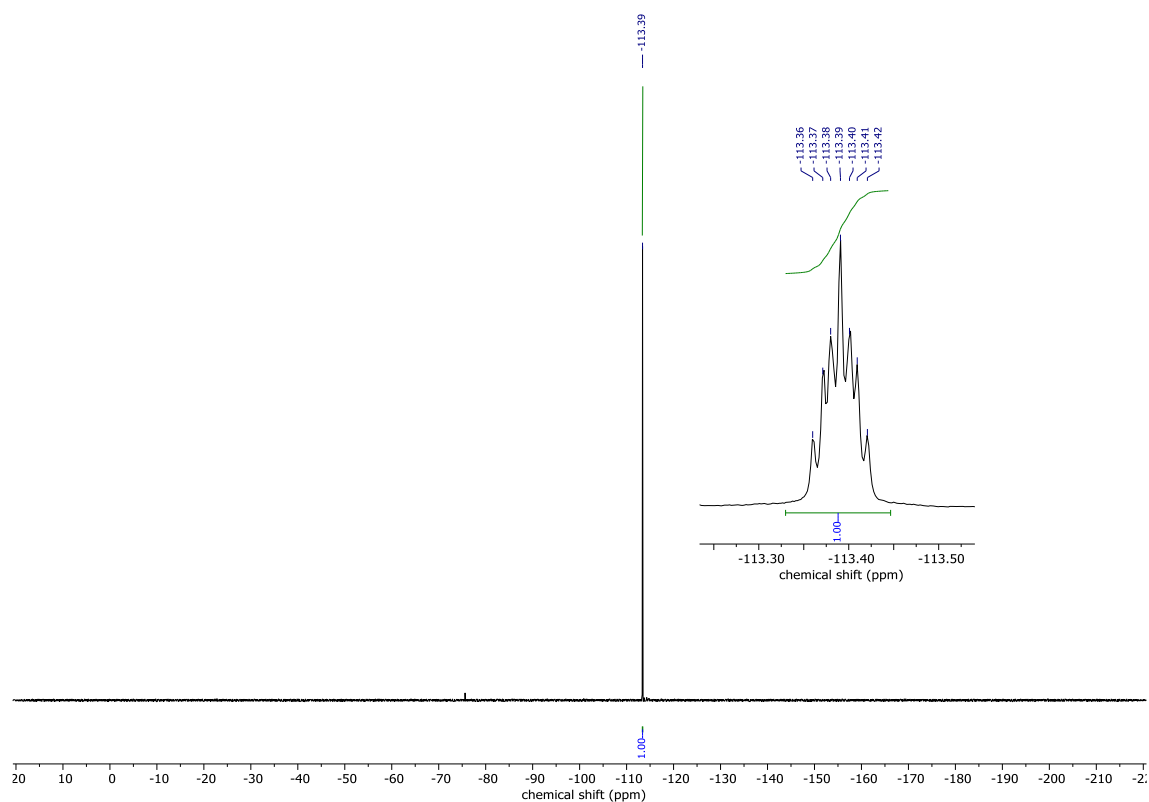

$^{19}\text{F}$  { $^1\text{H}$ } NMR (470.65 MHz)

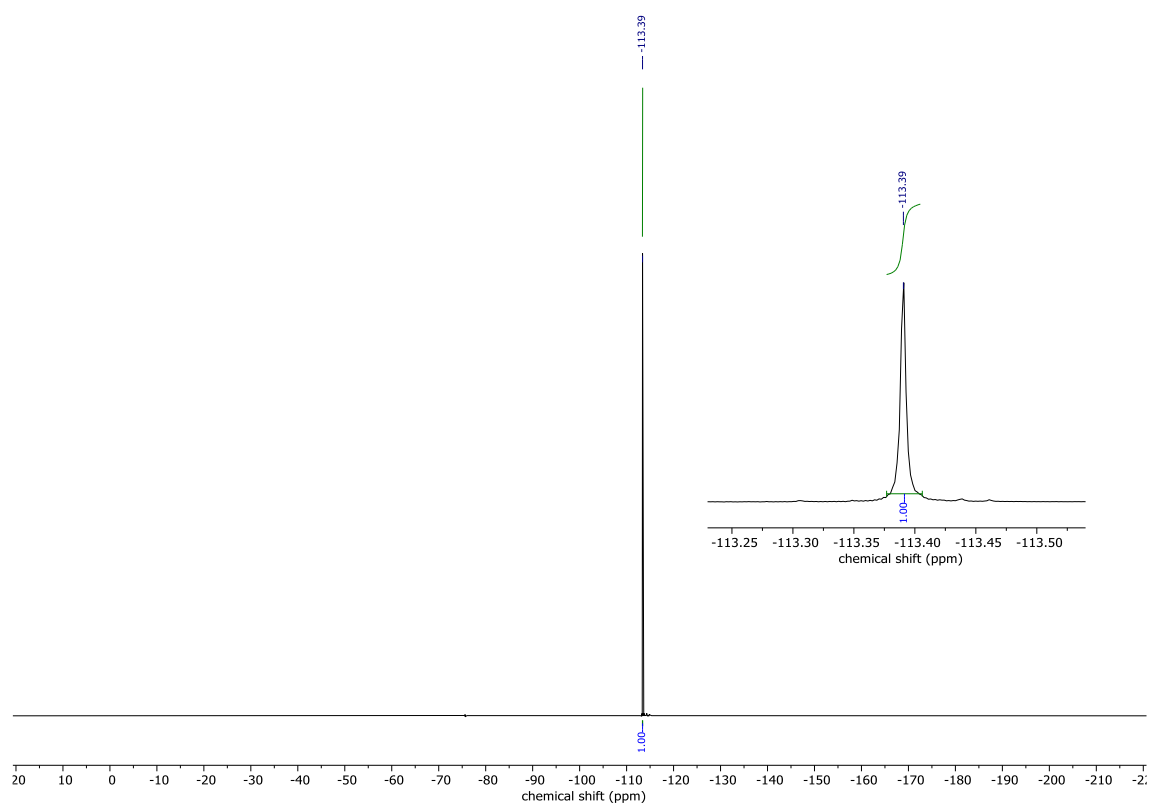

## UV-VIS spectrum

(recorded in 0.1M phosphate buffer pH 7.0)

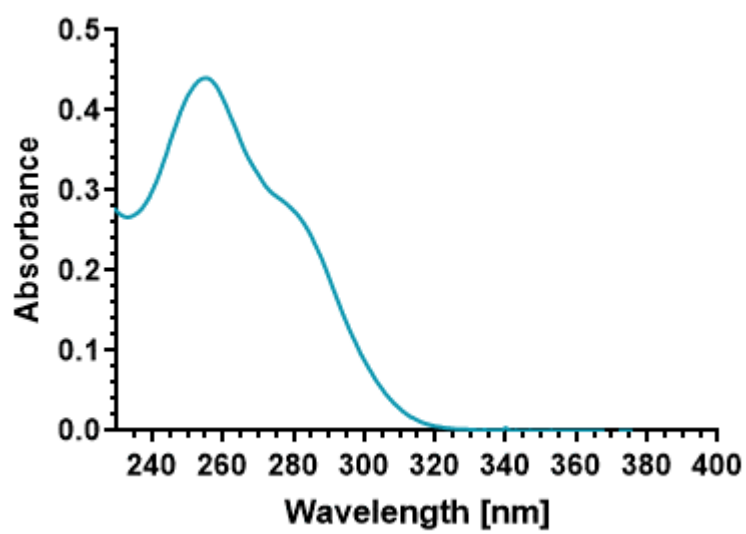

| 4-Cl-Bn <sup>7</sup> GpppG (1h)  |                                                                                                                                                                                                     |
|----------------------------------|-----------------------------------------------------------------------------------------------------------------------------------------------------------------------------------------------------|
| Structure                        | 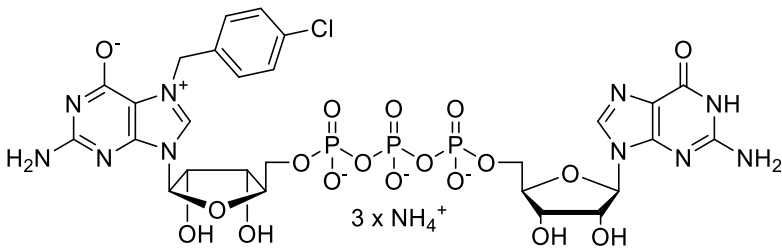                                                                                                                  |
| Reaction RP HPLC Profile         |  <p>DAD1 A, Sig=254,4 Ref=360,100 (RAD\2017-11-02\12-54-184-CL-BN7GPPPG.D)</p>                                    |
| Purified Product RP HPLC Profile |  <p>DAD1 A, Sig=254,4 Ref=360,100 (RAD\2017-07-04\10-02-234-CL-BN7GPPPG.D)</p>                                  |
| HRMS ES(-)                       |  <p>171213_RW_001#141-260 RT: 1.24-2.27 AV: 120 NL: 1.80E6<br/>T: FTMS - p ESI Full ms [150.0000-2000.0000]</p> |

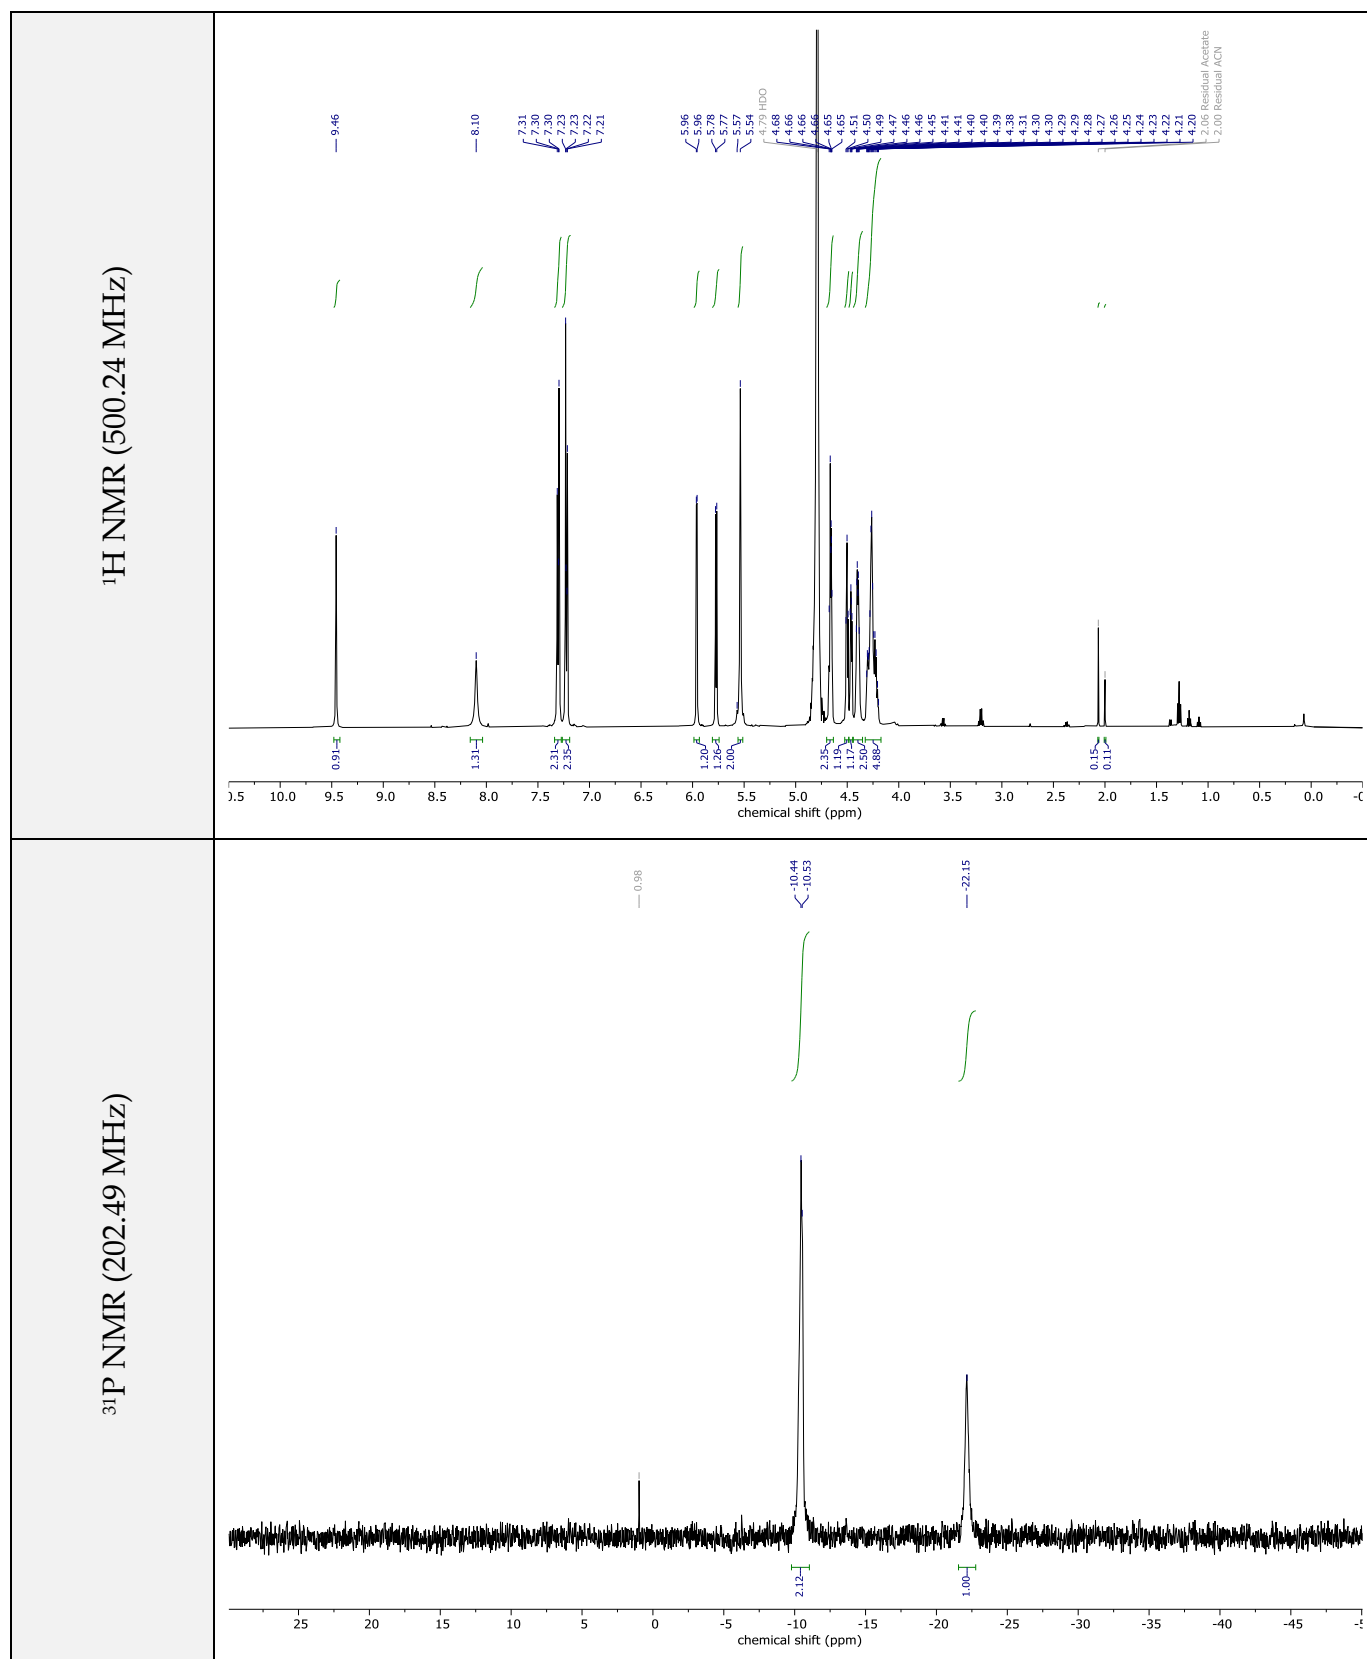

UV-VIS spectrum  
(recorded in 0.1M phosphate buffer pH

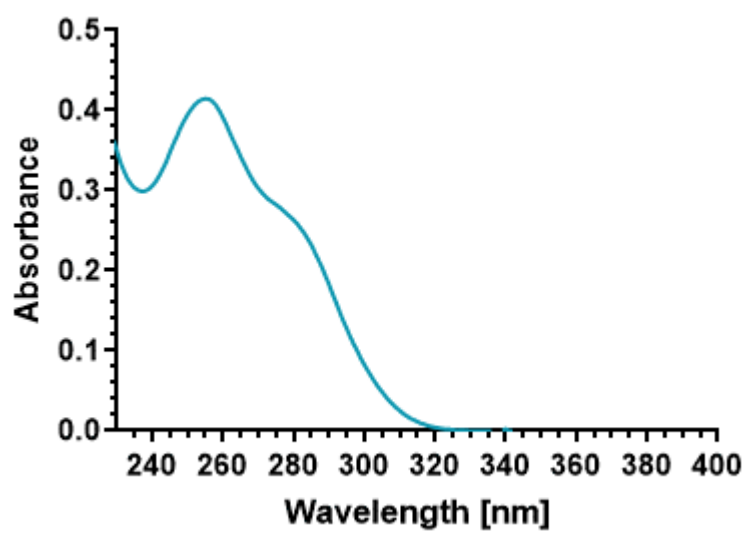

| 4-Br-Bn <sup>7</sup> GpppG ( <b>1i</b> ) |                                                                                                                                                                                                     |
|------------------------------------------|-----------------------------------------------------------------------------------------------------------------------------------------------------------------------------------------------------|
| Structure                                | 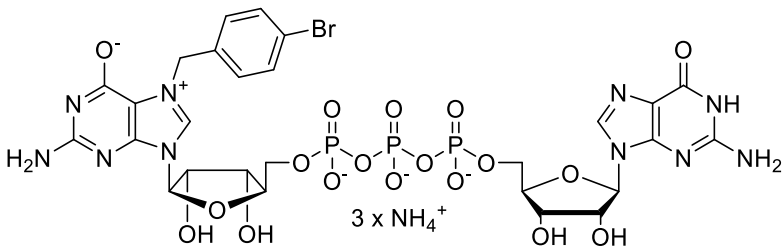                                                                                                                  |
| Reaction RP HPLC Profile                 |  <p>DAD1 A, Sig=254,4 Ref=360,100 (RAD\2018-03-0915-23-214-BR-BN7GPPPG.D)</p>                                     |
| Purified Product RP HPLC Profile         |  <p>DAD1 A, Sig=254,4 Ref=360,100 (RAD\2017-12-0718-53-184-BR-BN7GPPPG.D)</p>                                   |
| HRMS ES(-)                               |  <p>180110_RW_014 #27-195 RT: 0.24-1.70 AV: 189 NL: 5.72E6<br/>T: FTMS - p ESI Full ms [150.0000-2000.0000]</p> |

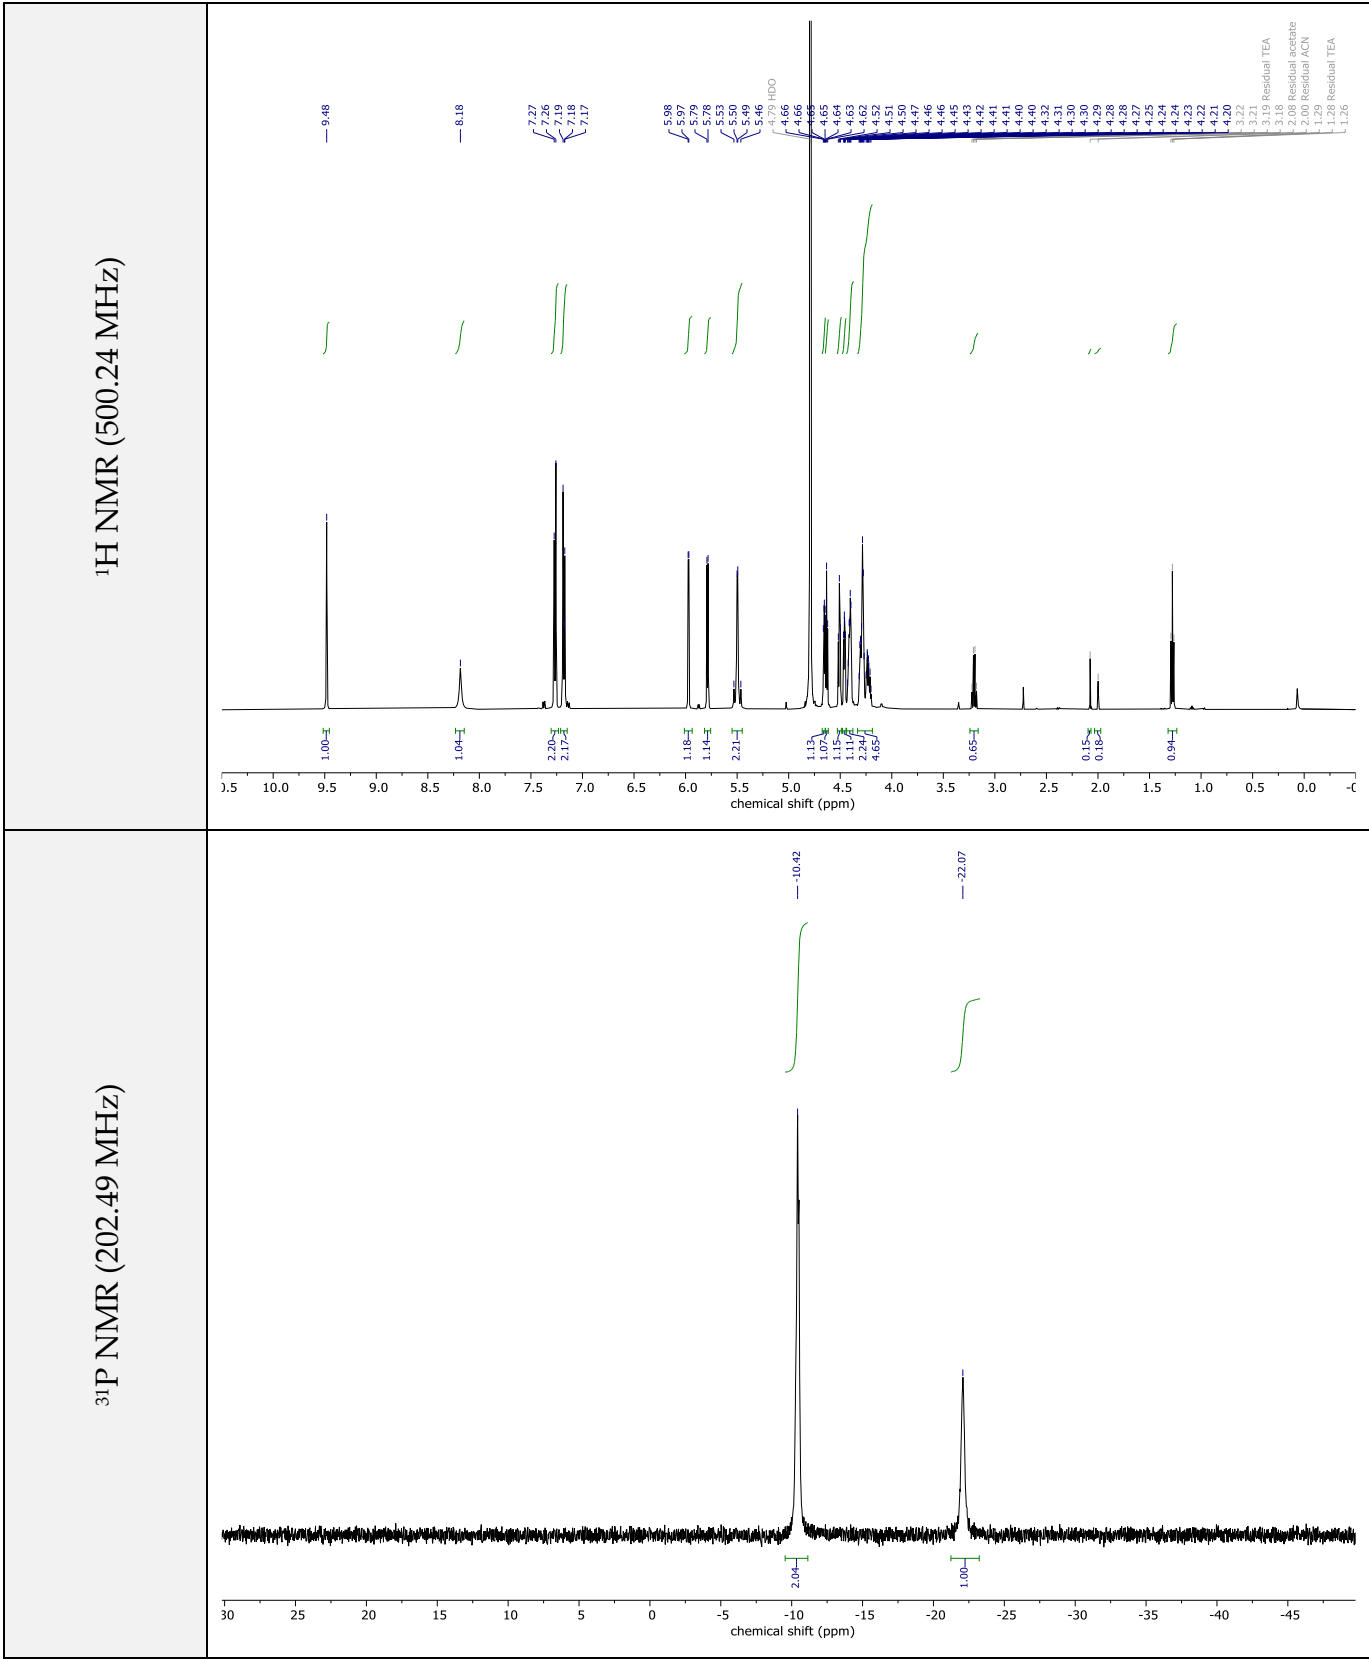

## UV-VIS spectrum

(recorded in 0.1M phosphate buffer pH 7.0)

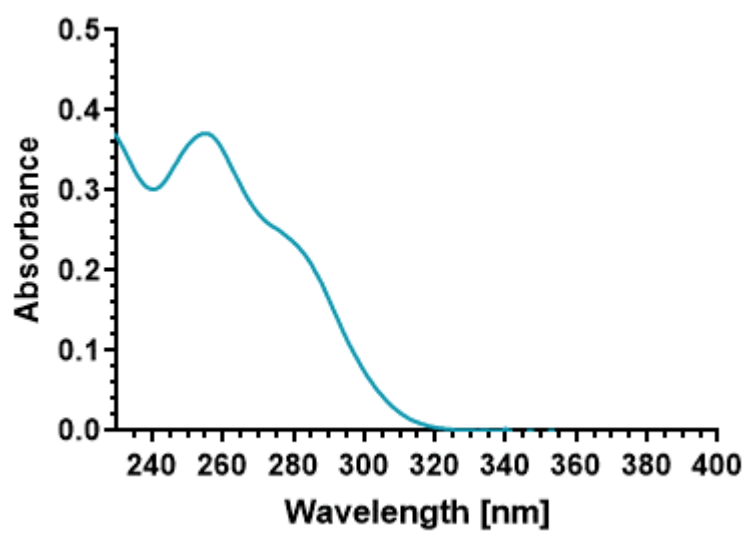



| 2,4-di-F-Bn <sup>7</sup> GpppG (1j) |                                                                                                               |
|-------------------------------------|---------------------------------------------------------------------------------------------------------------|
| Structure                           |                                                                                                               |
| Reaction RP HPLC Profile            | <p>DAD1 A, Sig=254,4 Ref=360,100 (RAD\2018-03-0813-34-252,4-2F-BN7GPPPG.D)</p>                                |
| Purified Product RP HPLC Profile    | <p>DAD1 A, Sig=254,4 Ref=360,100 (RAD\2017-07-0408-45-302,4-2F-BN7GPPPG.D)</p>                                |
| HRMS ES(-)                          | <p>171213_RW_002 #25-113 RT: 0.22-0.99 AV: 89 NL: 1.52E6<br/>T: FTMS - p ESI Full ms [150.0000-2000.0000]</p> |

$^1\text{H}$  NMR (500.24 MHz)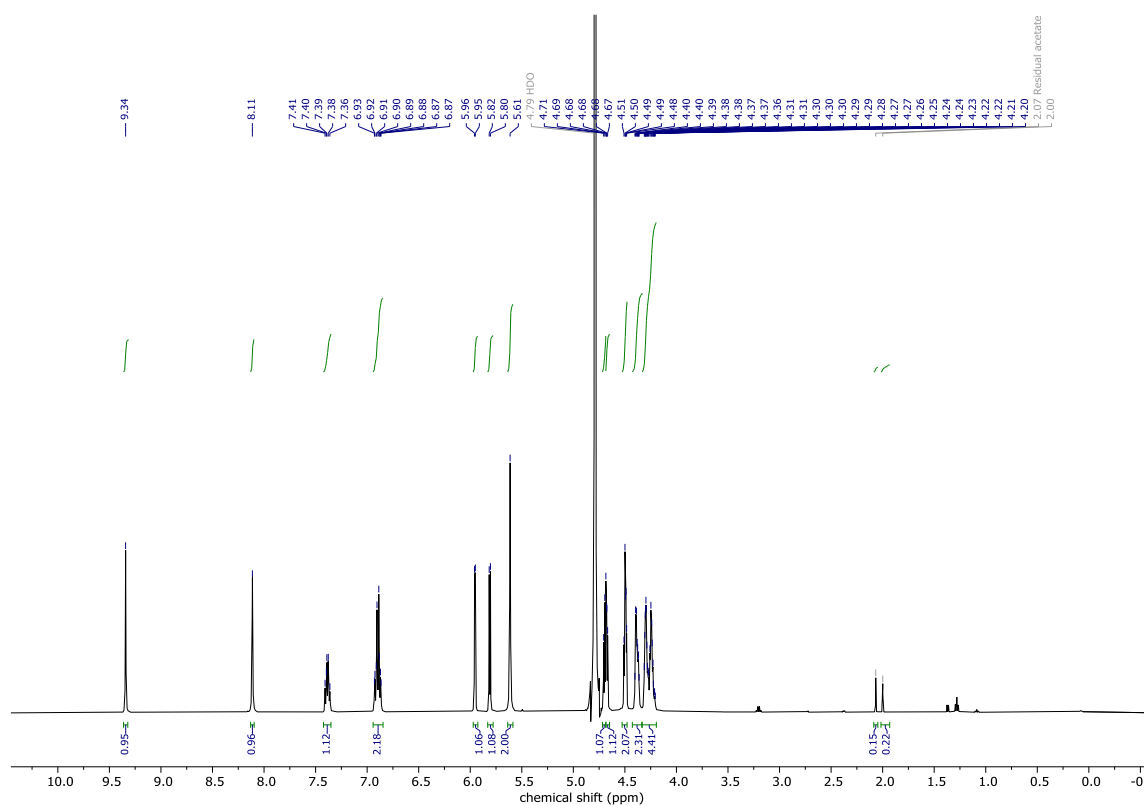 $^{31}\text{P}$  NMR (202.49 MHz)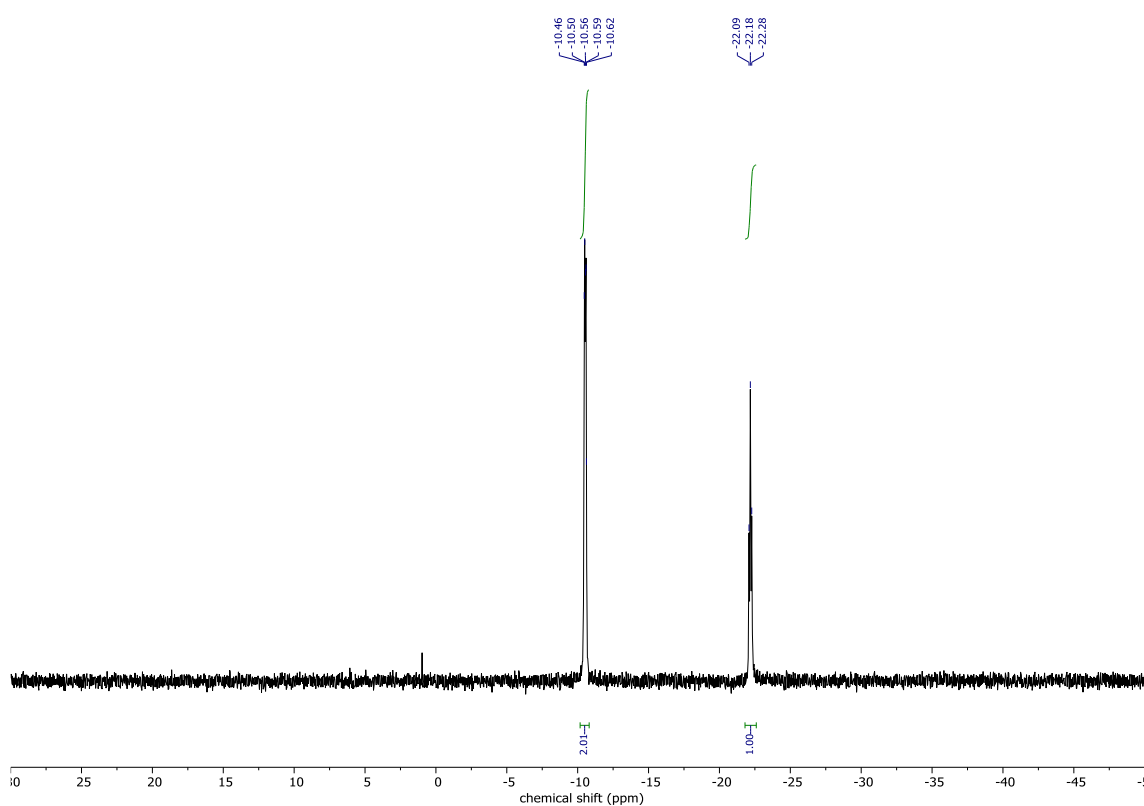

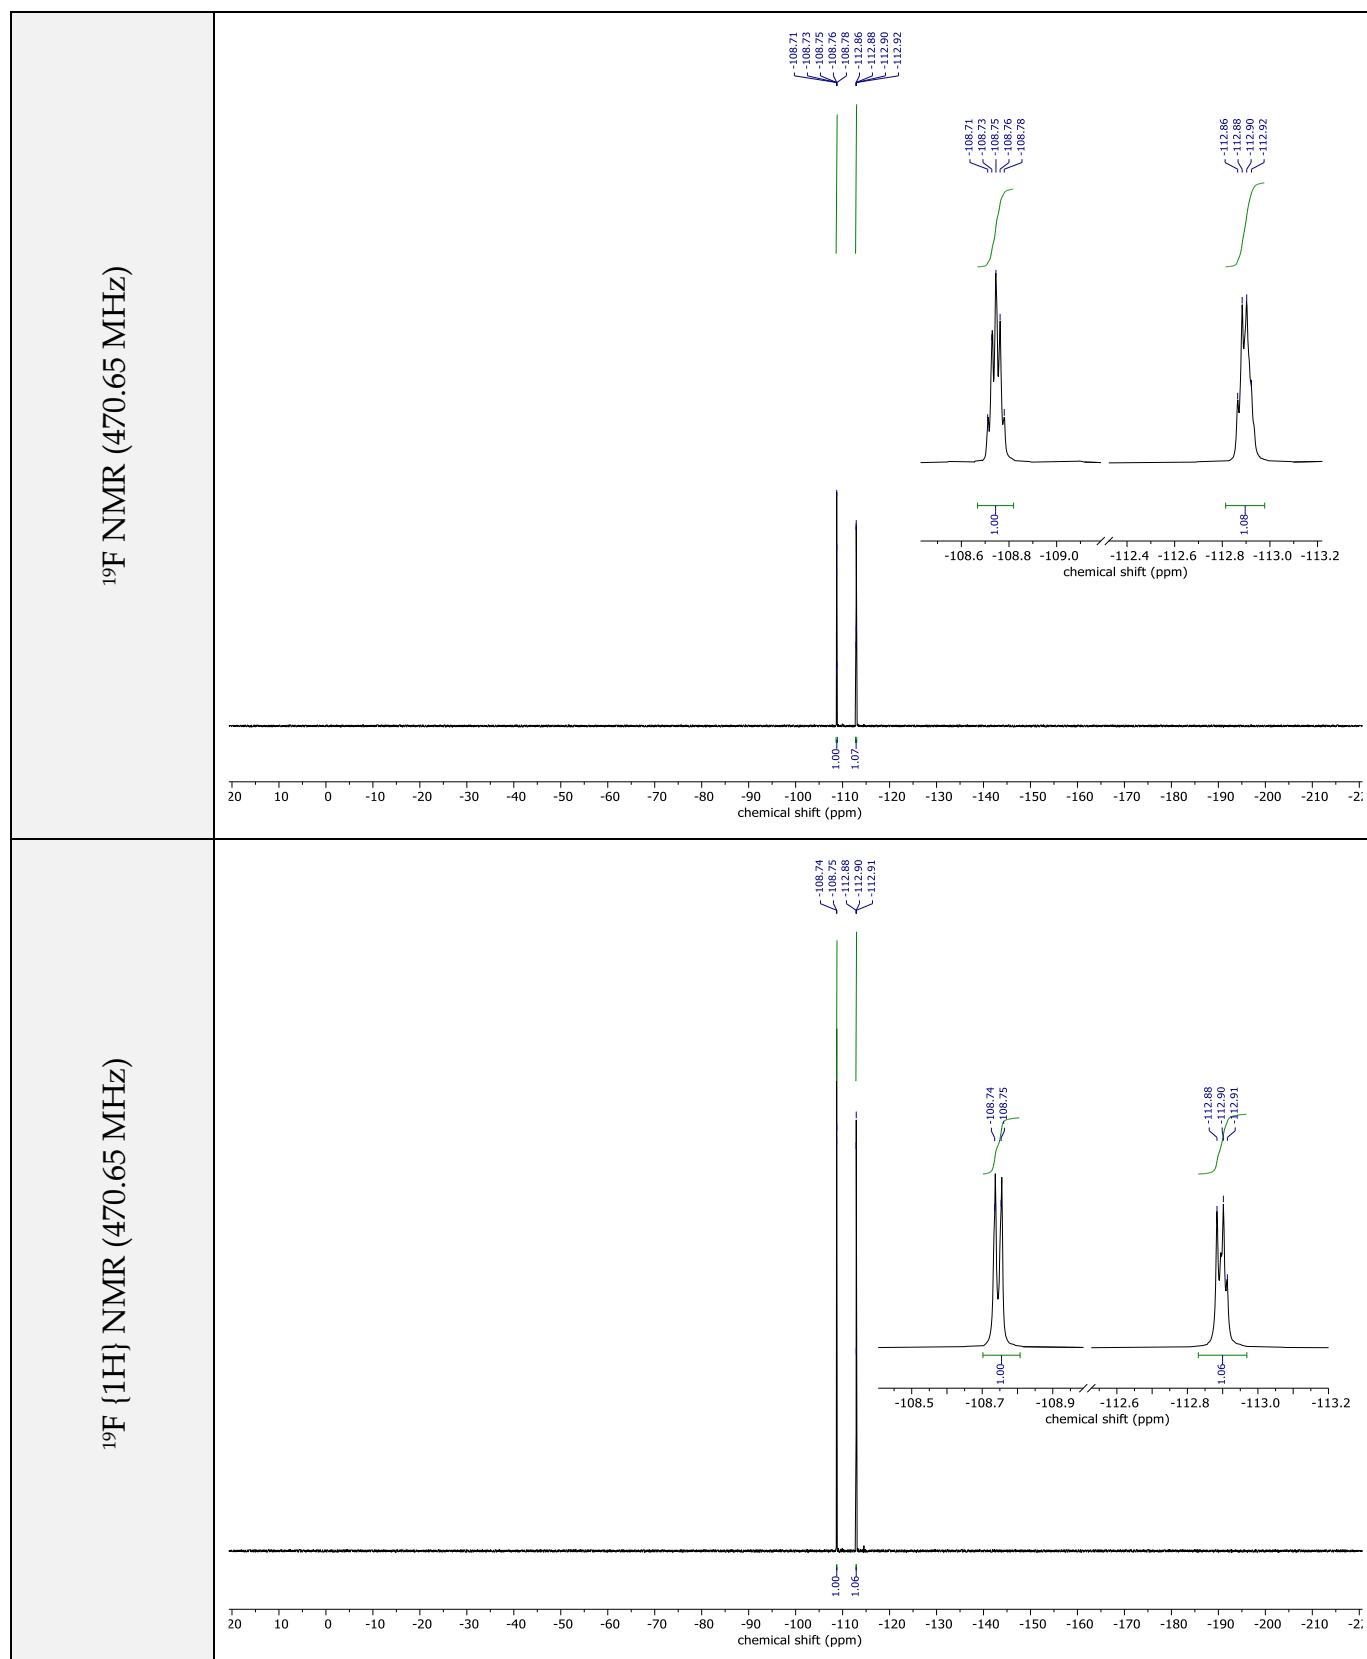

## UV-VIS spectrum

(recorded in 0.1M phosphate buffer pH 7.0)

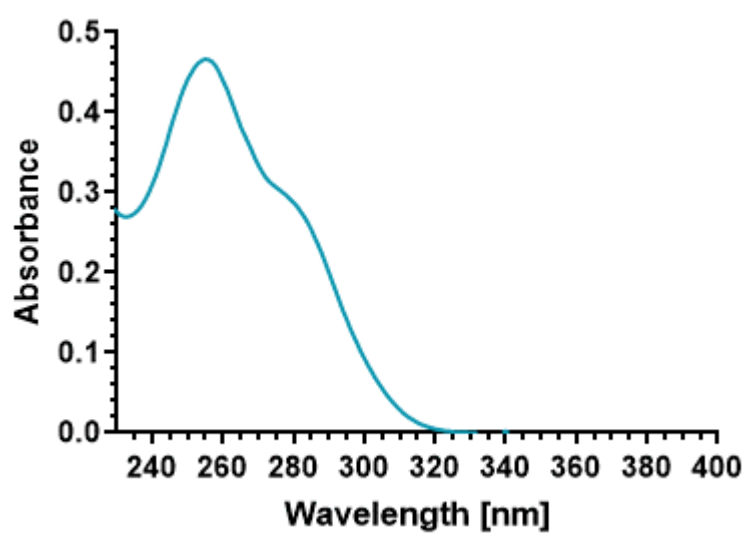

| 3,4-di-F-Bn <sup>7</sup> GpppG (1k) |                                                                                                                                                                                                  |
|-------------------------------------|--------------------------------------------------------------------------------------------------------------------------------------------------------------------------------------------------|
| Structure                           | 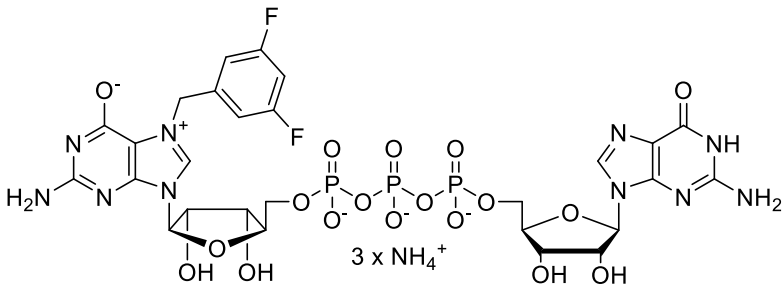                                                                                                               |
| Reaction RP HPLC Profile            |  <p>DAD1 A, Sig=254,4 Ref=360,100 (RAD\2018-03-0913-24-103,4-2F-BN7GPPPG.D)</p>                                |
| Purified Product RP HPLC Profile    |  <p>DAD1 A, Sig=254,4 Ref=360,100 (RAD\2017-07-0409-04-583,4-2F-BN7GPPPG.D)</p>                              |
| HRMS ES(-)                          |  <p>171213_RW_003_#4-88 RT: 0.03-0.59 AV: 65 NL: 1.11E6<br/>T: FTMS - p ESI Full ms [150.0000-2000.0000]</p> |

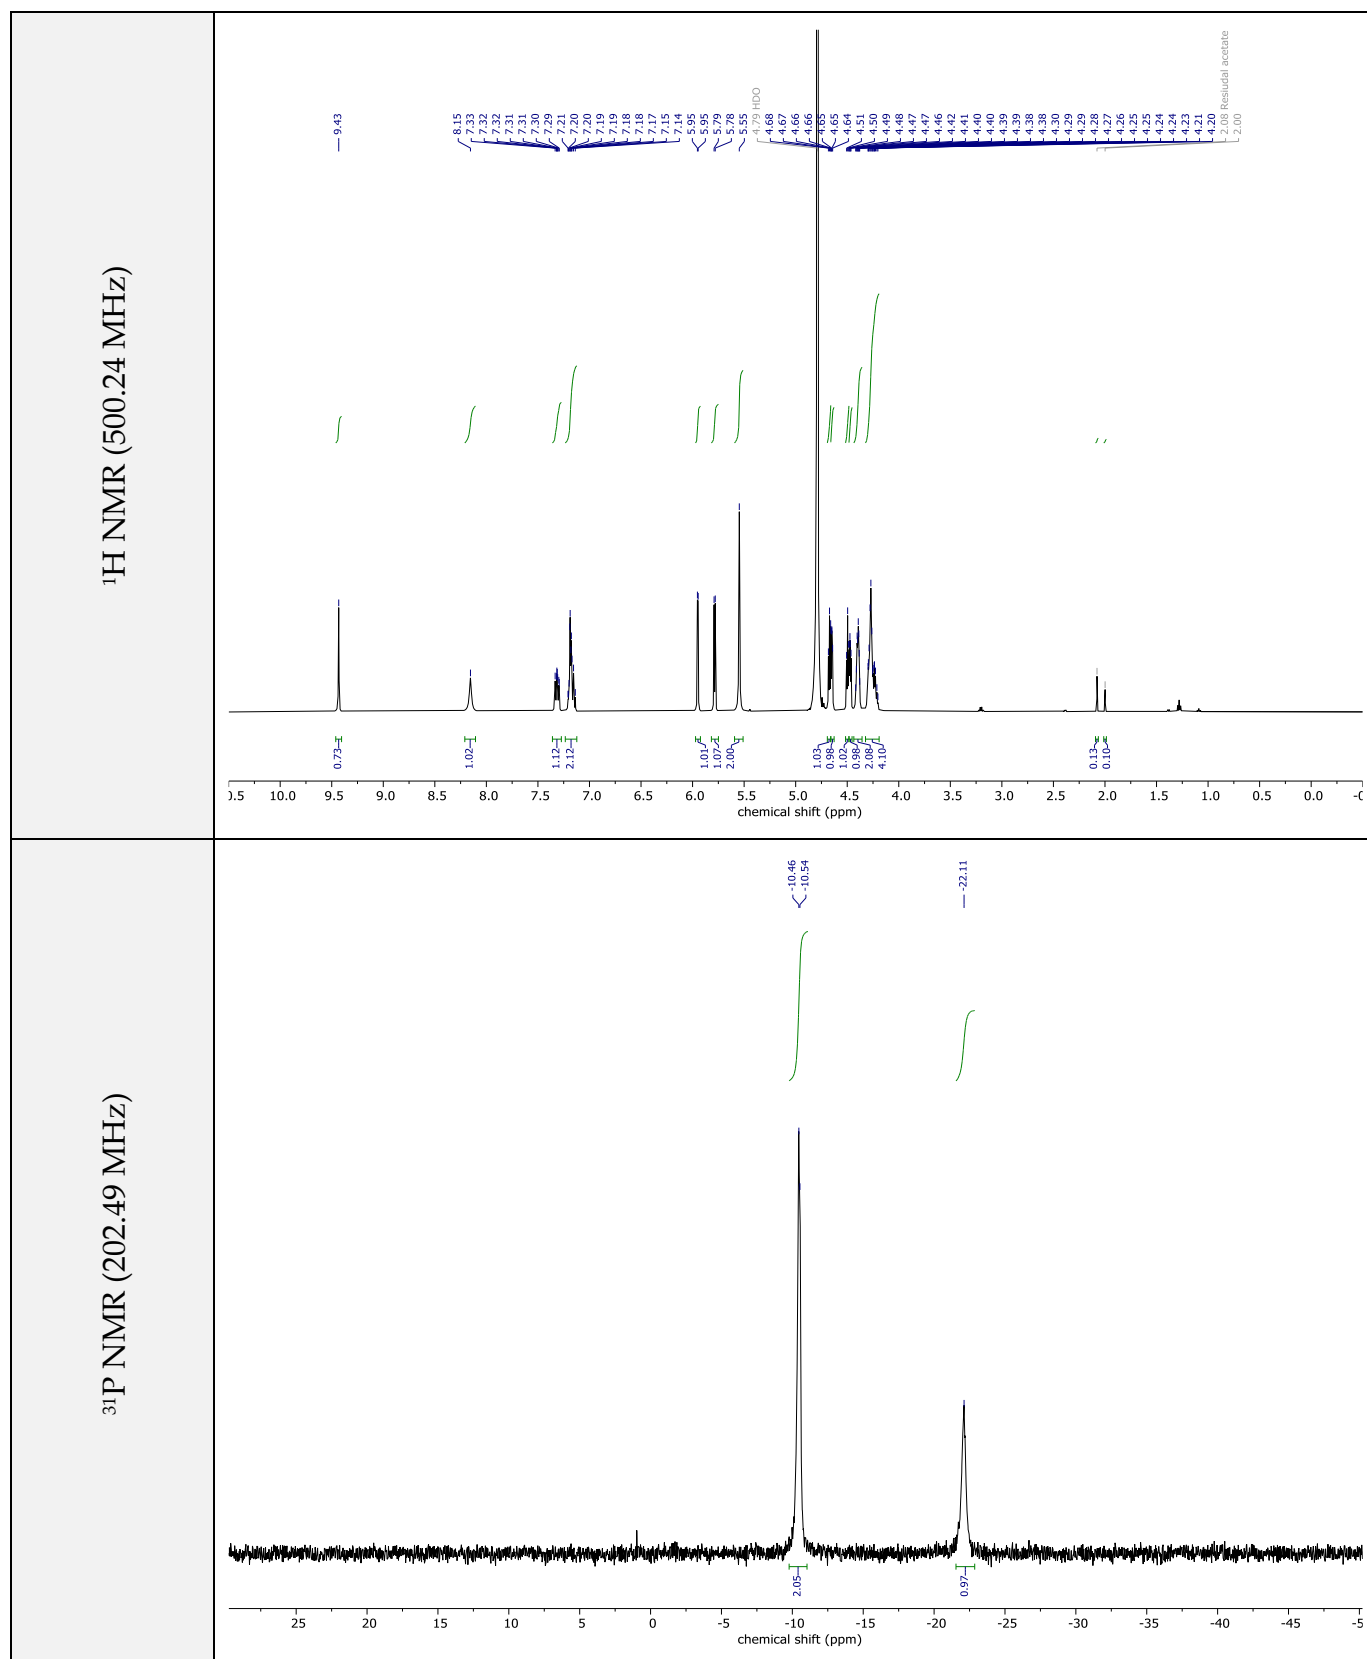

$^{19}\text{F}$  NMR (470.65 MHz)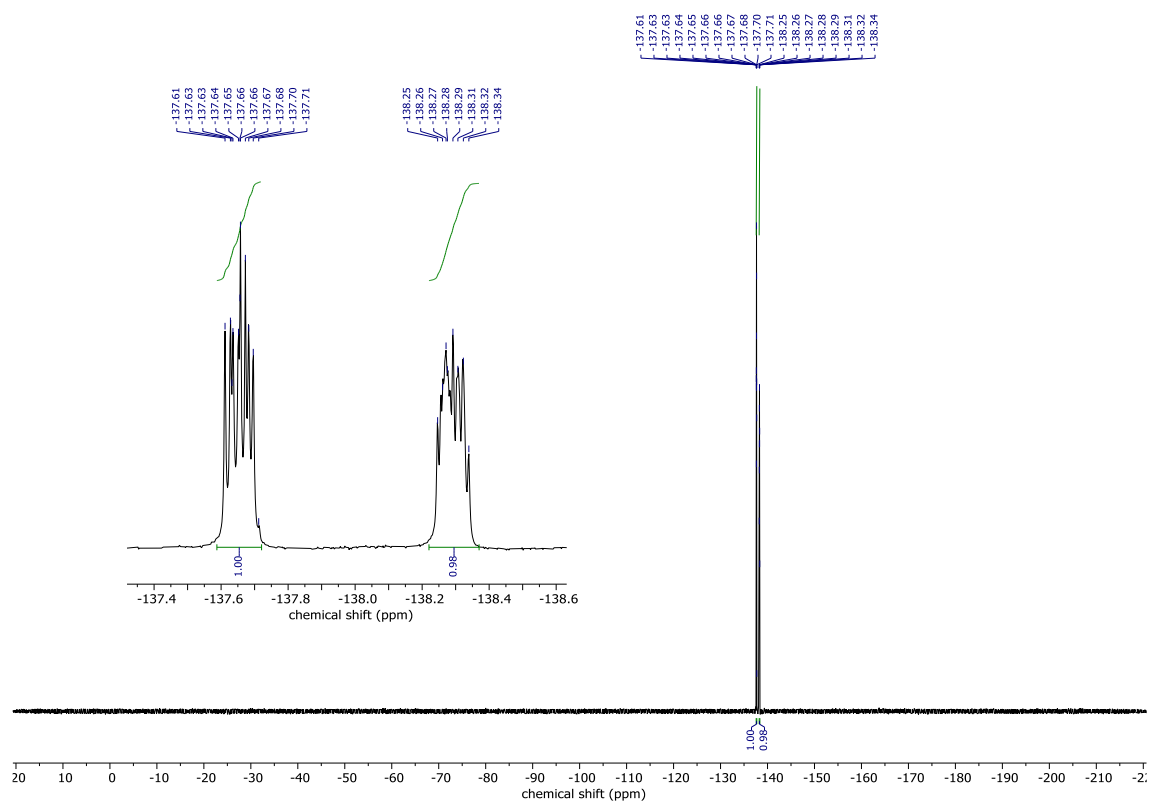 $^{19}\text{F}$  { $^1\text{H}$ } NMR (470.65 MHz)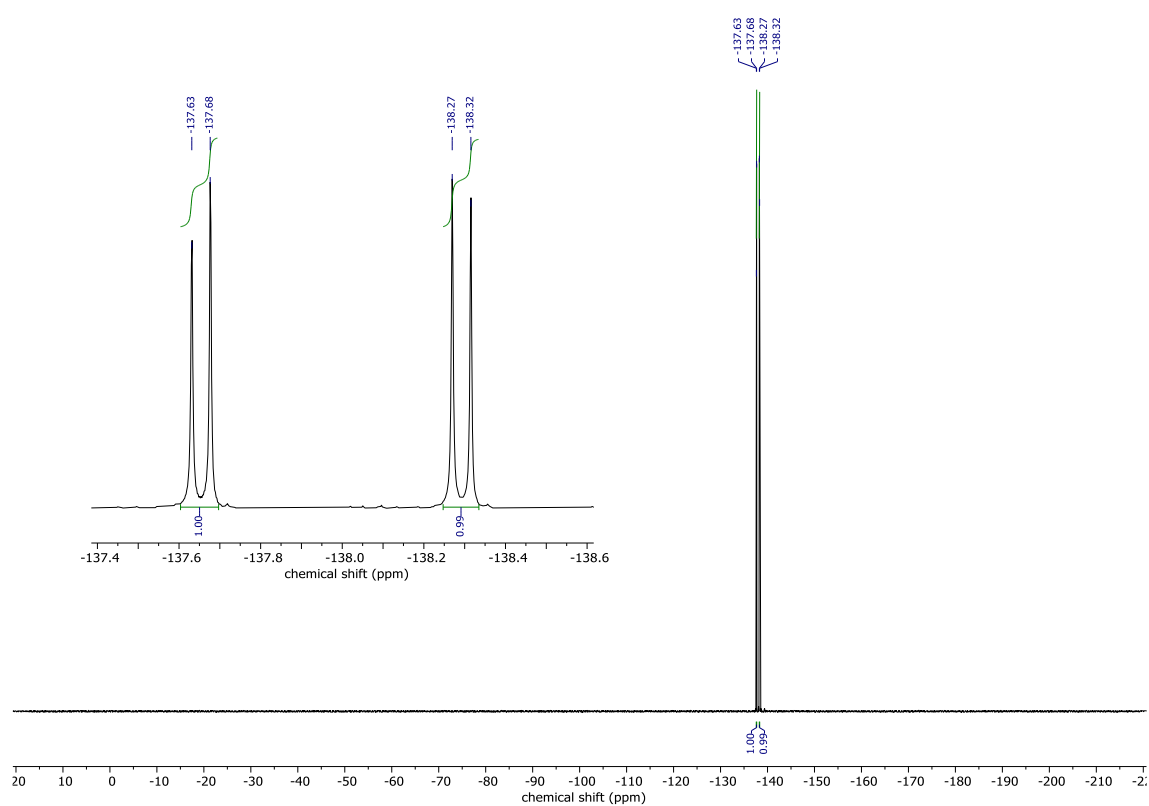

## UV-VIS spectrum

(recorded in 0.1M phosphate buffer pH 7.0)

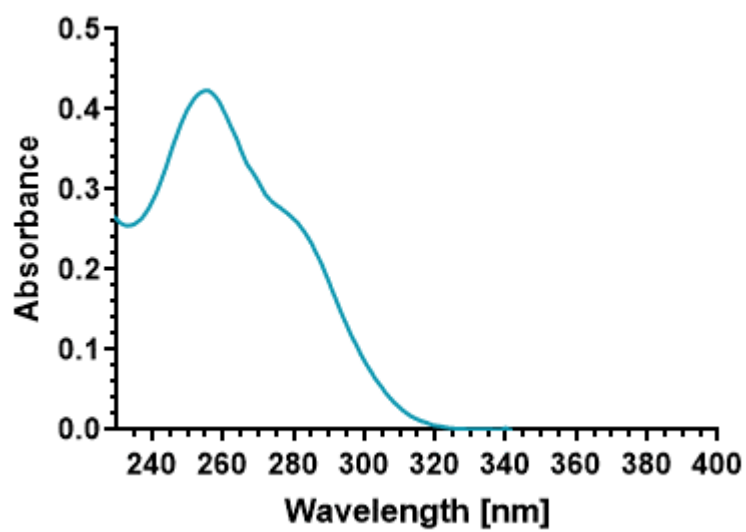



| 4-CF <sub>3</sub> -Bn <sup>7</sup> GpppG (11) |                                                                                                             |
|-----------------------------------------------|-------------------------------------------------------------------------------------------------------------|
| Structure                                     |                                                                                                             |
| Reaction RP HPLC Profile                      | <p>DAD1 A, Sig=254,4 Ref=360,100 (MAREKB4CF3BN7GPPPG 2016-11-30 13-26-41.D)</p>                             |
| Purified Product RP HPLC Profile              | <p>DAD1 A, Sig=254,4 Ref=360,100 (MBI2019-12-1610-54-304CF3-BN-GPPPG.D)</p>                                 |
| HRMS ES(-)                                    | <p>191220_RW_1#194-250 RT: 1.84-2.38 AV: 57 NL: 1.06E7<br/>T: FTMS - p ESI Full ms [150.0000-2000.0000]</p> |

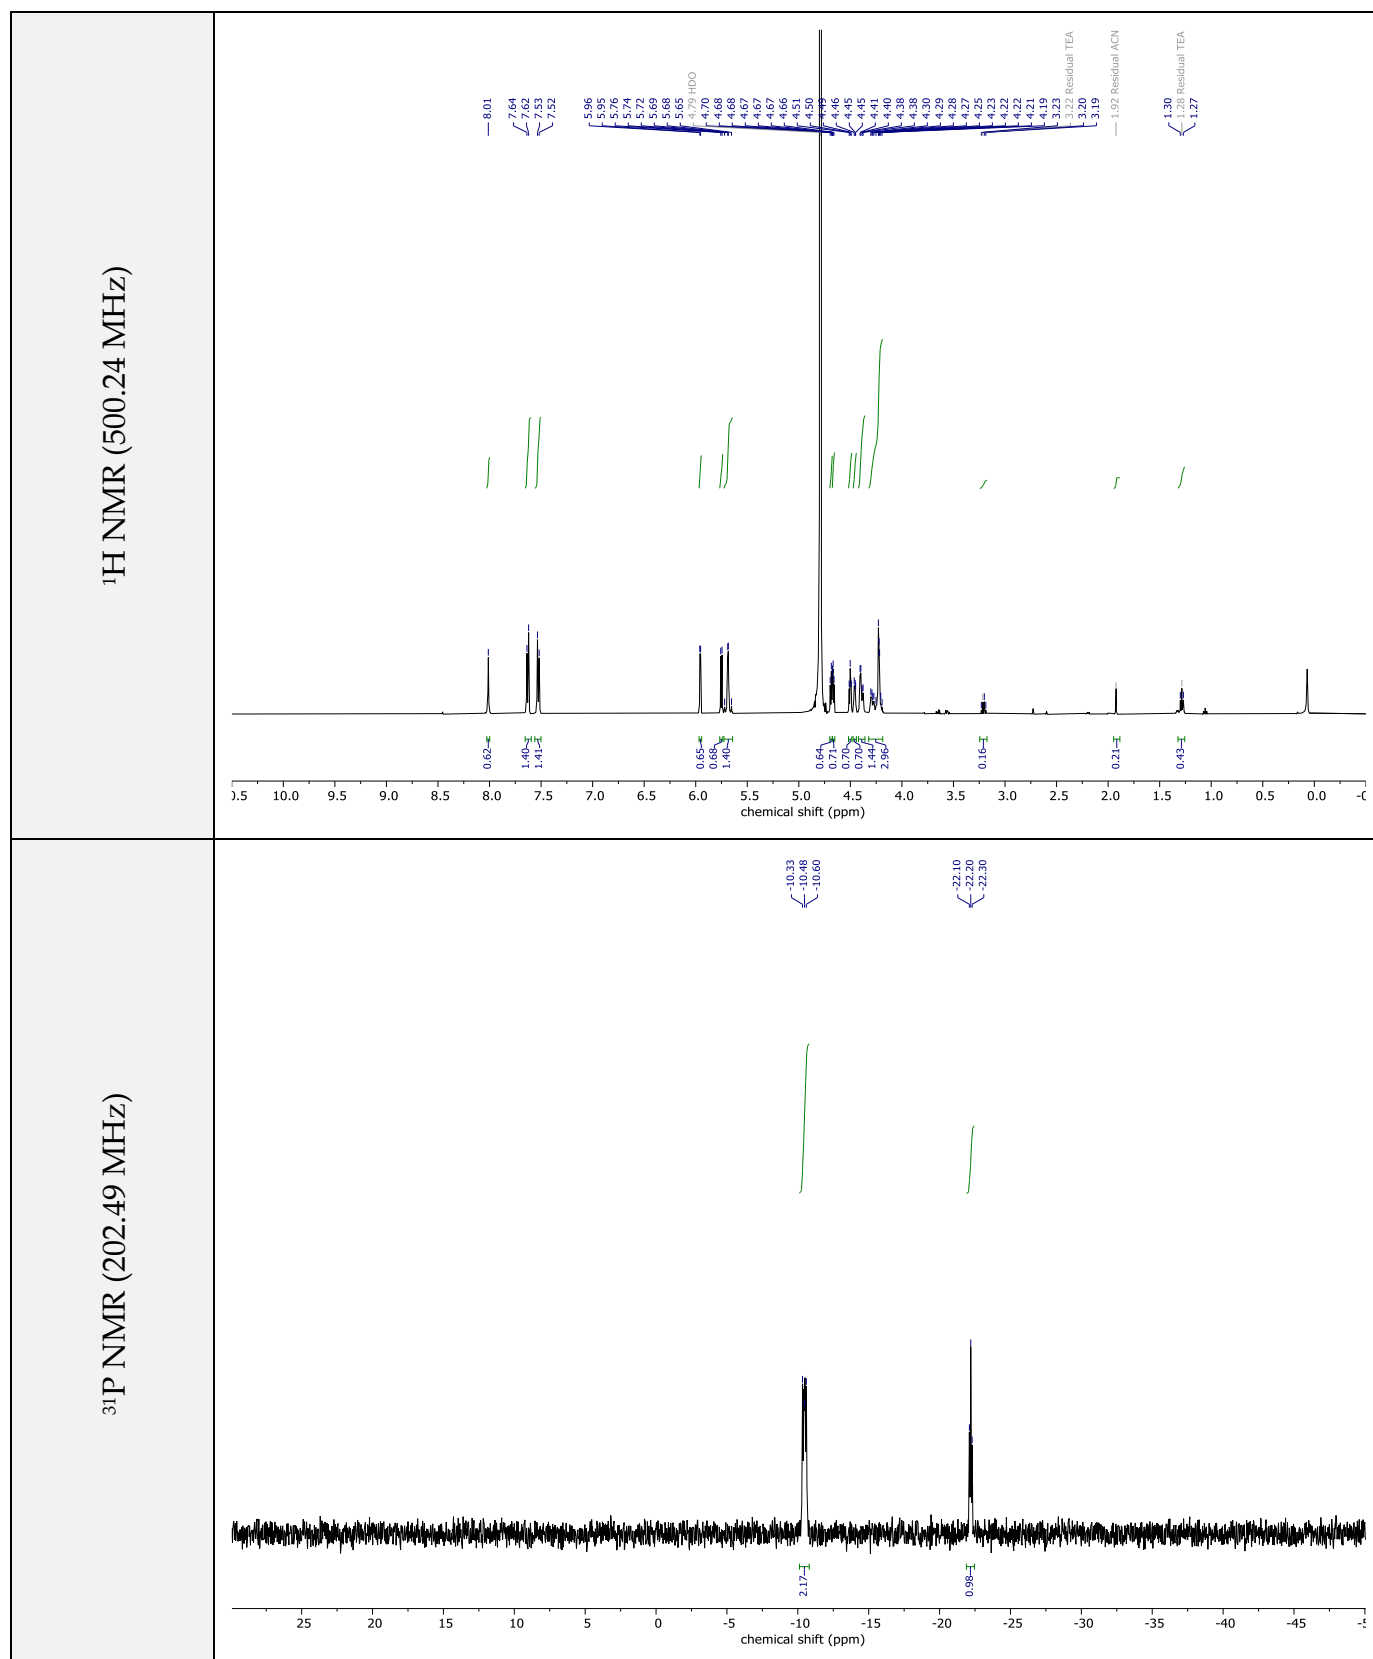

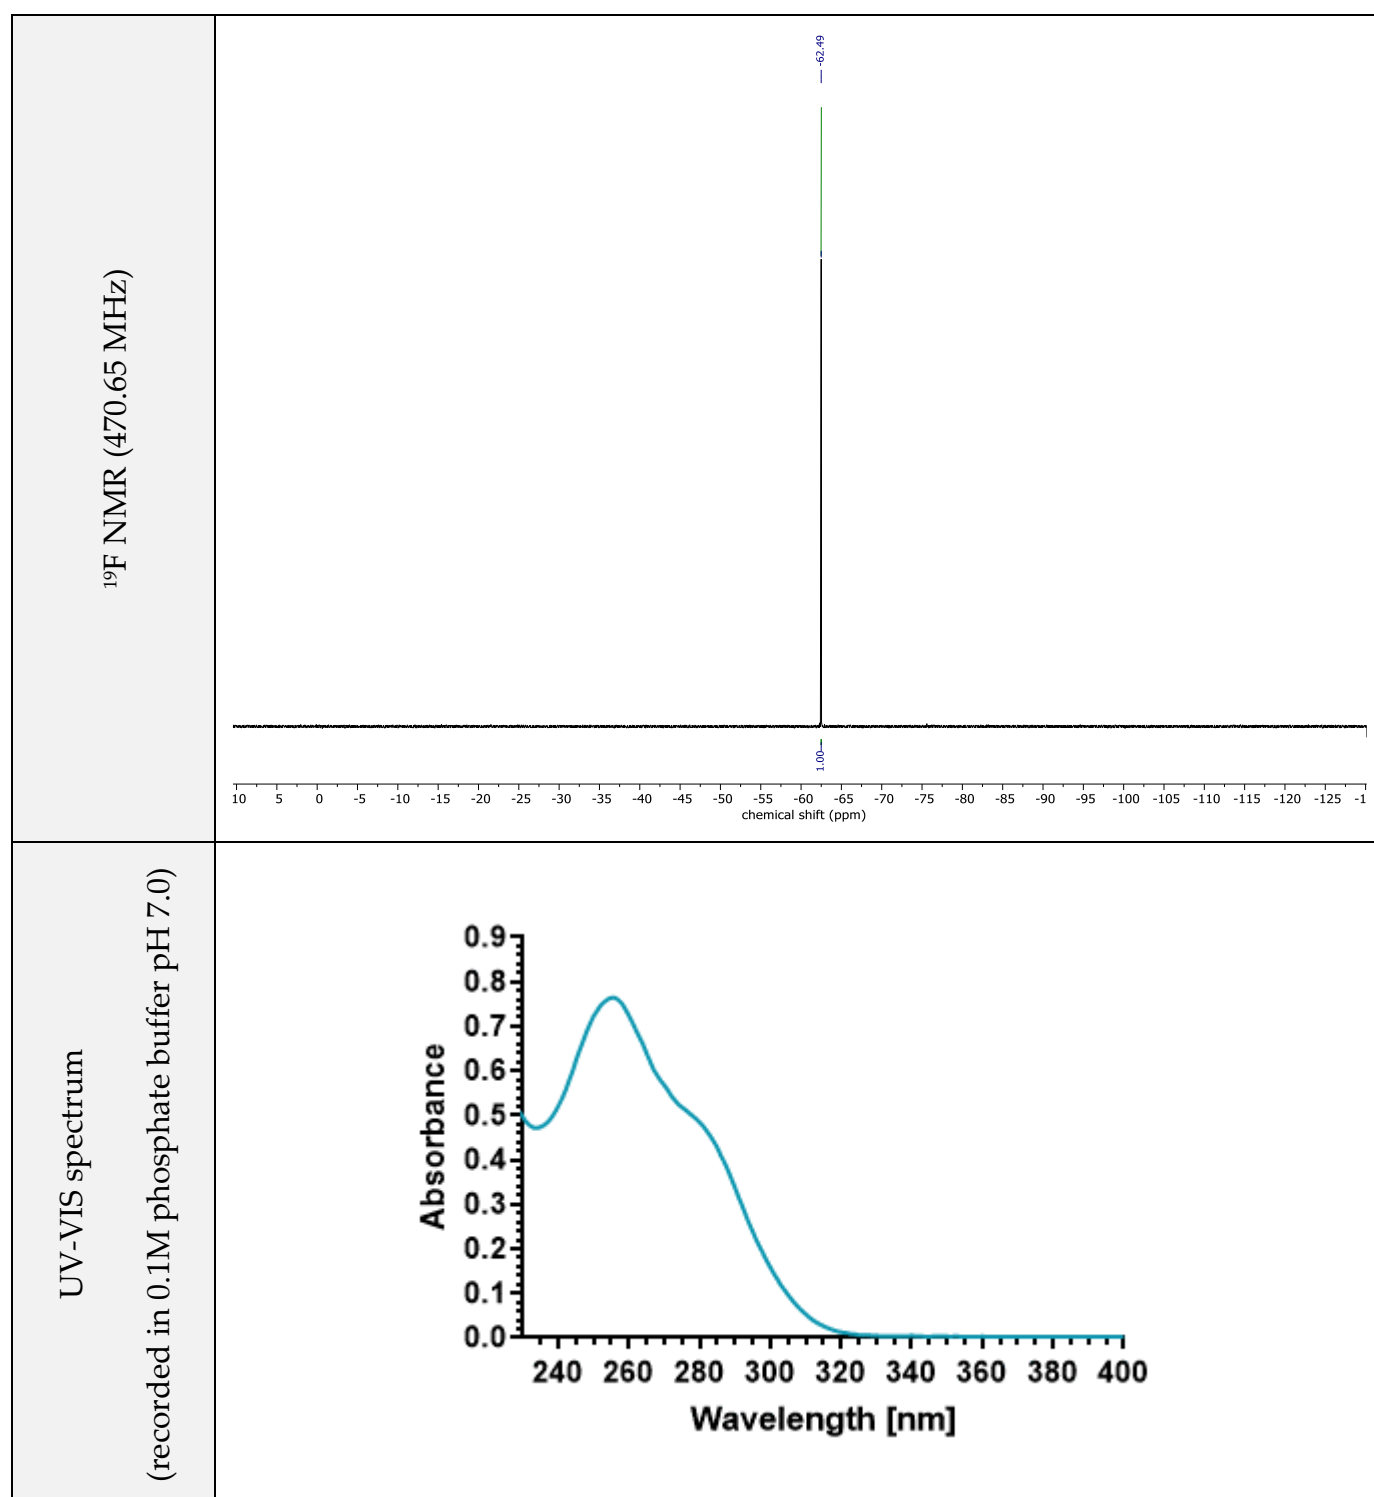

| 4-COOH-Bn <sup>7</sup> GpppG (1m) |                                                                                                                                                                                                     |
|-----------------------------------|-----------------------------------------------------------------------------------------------------------------------------------------------------------------------------------------------------|
| Structure                         | 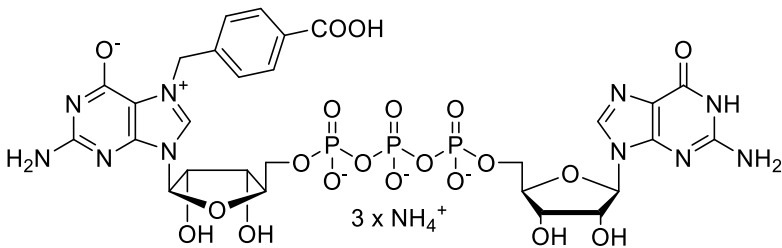                                                                                                                  |
| Reaction RP HPLC Profile          |  <p>DAD1 A, Sig=254,4 Ref=360,100 (RAD\2018-03-1516-21-064-COOH-BN7GPPPG.D)</p>                                   |
| Purified Product RP HPLC Profile  |  <p>DAD1 A, Sig=254,4 Ref=360,100 (RAD\2017-12-1414-05-114-COOH-BN7GPPPG.D)</p>                                 |
| HRMS ES(-)                        |  <p>180110_RW_015 #78-256 RT: 0.68-2.23 AV: 179 NL: 6.02E5<br/>T: FTMS - p ESI Full ms [150.0000-2000.0000]</p> |

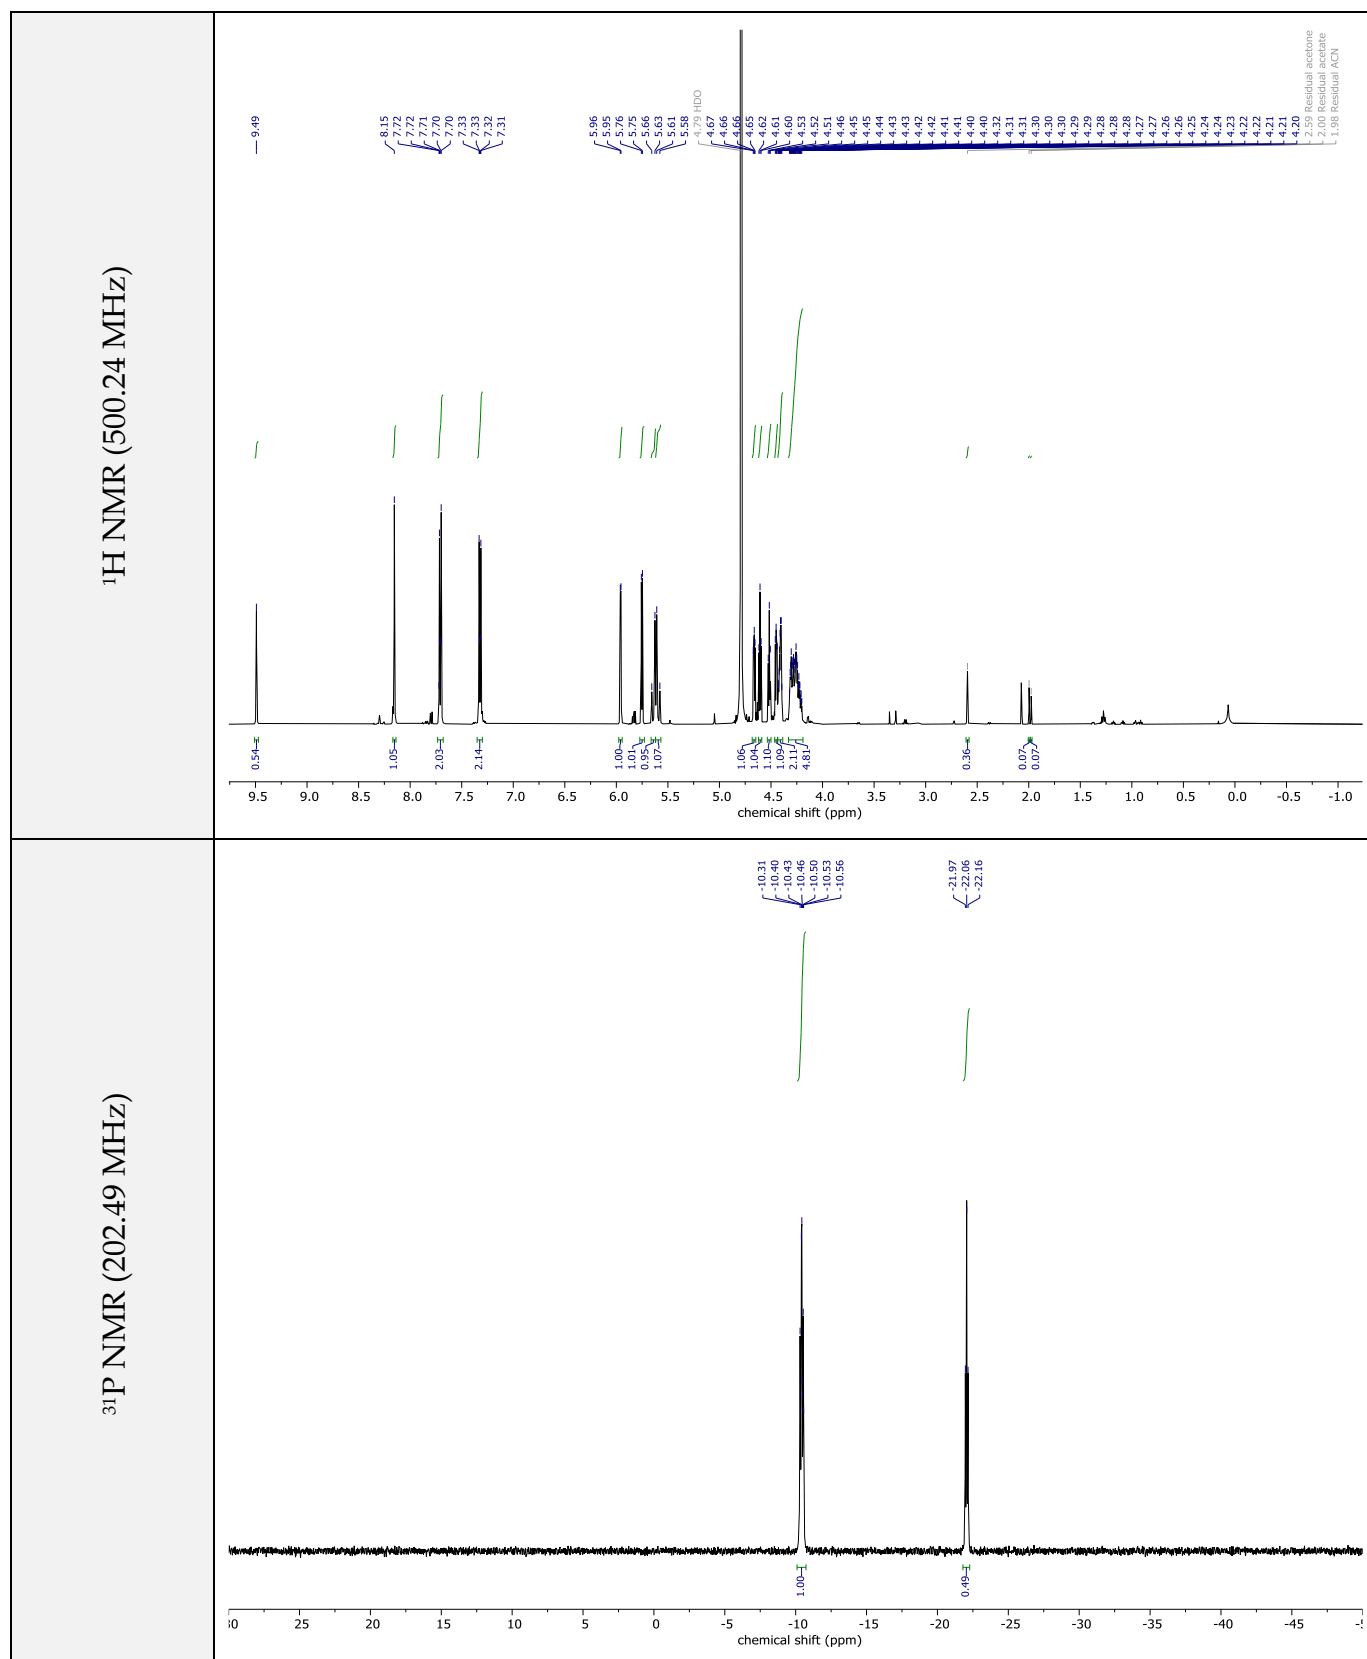

## UV-VIS spectrum

(recorded in 0.1M phosphate buffer pH 7.0)

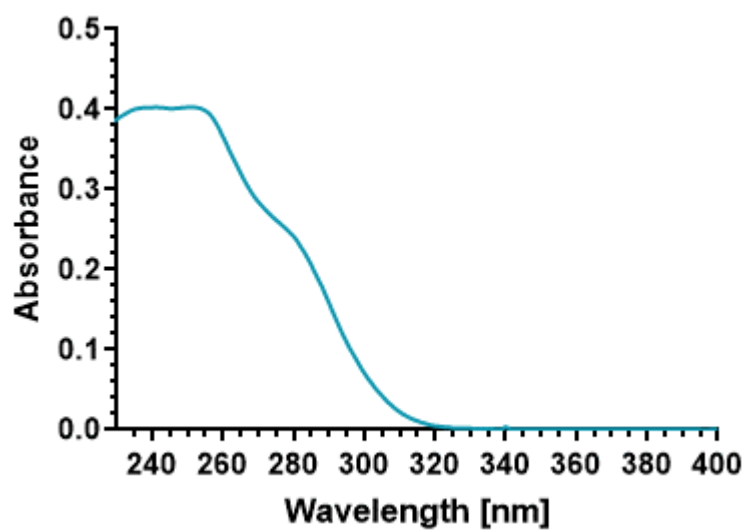

| 4-NO <sub>2</sub> -Bn <sup>7</sup> GpppG (1n) |                                                                                                                |
|-----------------------------------------------|----------------------------------------------------------------------------------------------------------------|
| Structure                                     |                                                                                                                |
| Reaction RP HPLC Profile                      | <p>DAD1 A, Sig=254,4 Ref=360,100 (RAD\2018-03-0914-44-594-NO2-BN7GPPPG.D)</p>                                  |
| Purified Product RP HPLC Profile              | <p>DAD1 A, Sig=254,4 Ref=360,100 (RAD\2017-12-0810-22-324-NO2-BN7GPPPG.D)</p>                                  |
| HRMS ES(-)                                    | <p>180110_RW_012 #61-251 RT: 0.53-2.19 AV: 191 NL: 1.21E6<br/>T: FTMS - p ESI Full ms [100.0000-1500.0000]</p> |

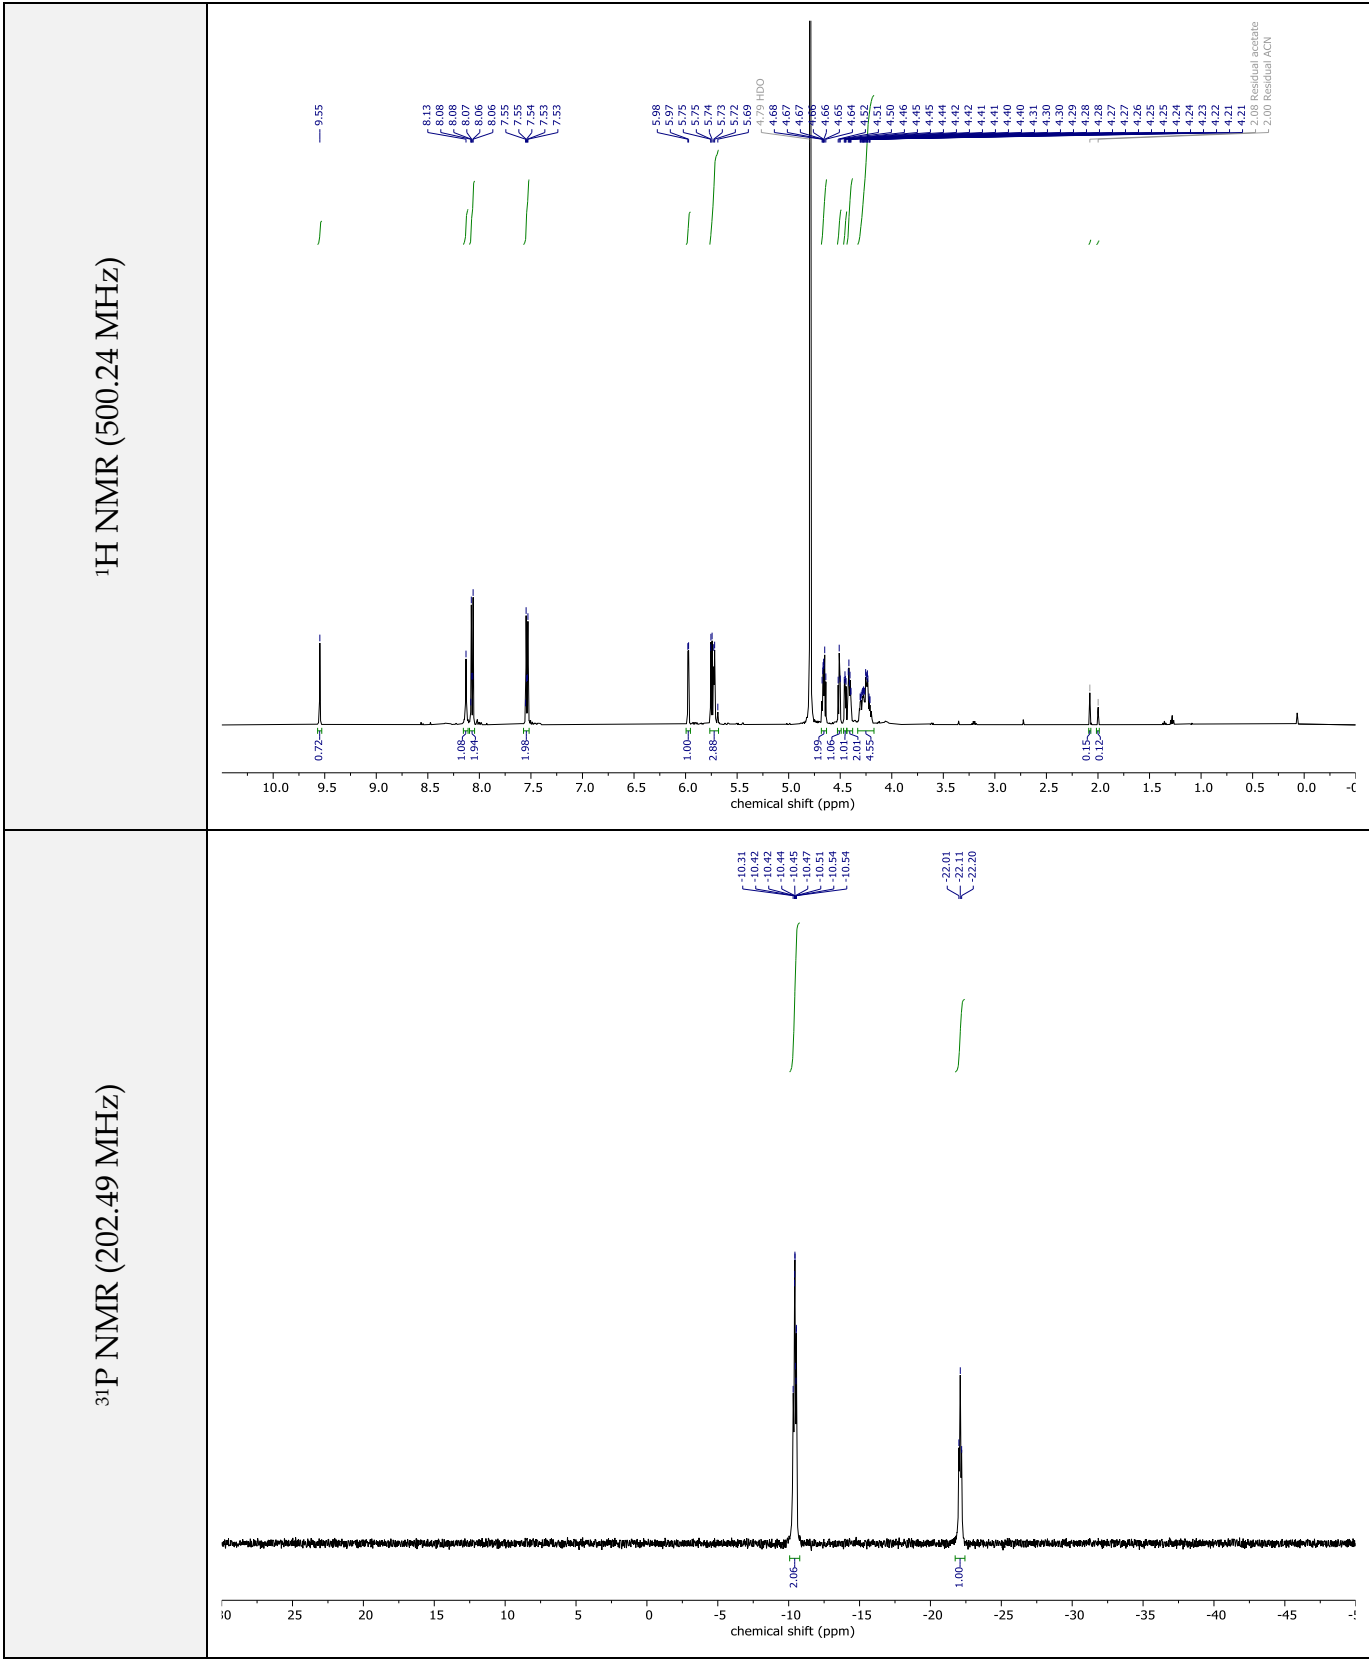



## UV-VIS spectrum

(recorded in 0.1M phosphate buffer pH 7.0)

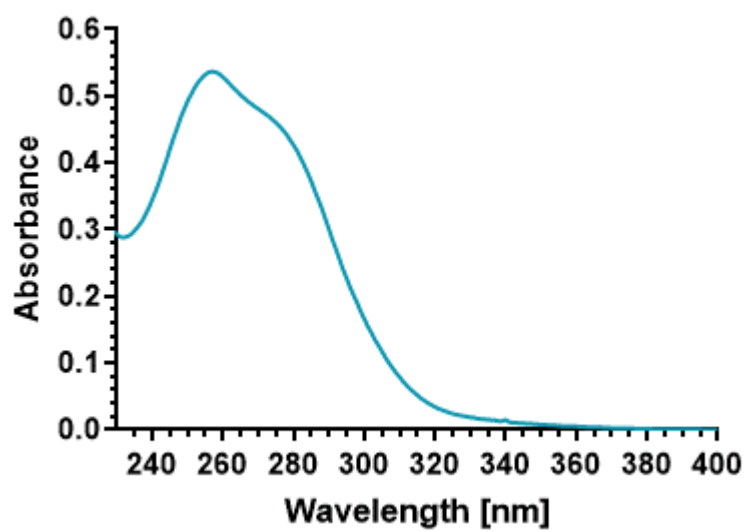

| $\alpha$ -Naphm <sup>7</sup> GpppG (10) |                                                                                                                                                                                                                                                                                                                                                                                             |                      |     |       |       |       |      |        |      |
|-----------------------------------------|---------------------------------------------------------------------------------------------------------------------------------------------------------------------------------------------------------------------------------------------------------------------------------------------------------------------------------------------------------------------------------------------|----------------------|-----|-------|-------|-------|------|--------|------|
| Structure                               | 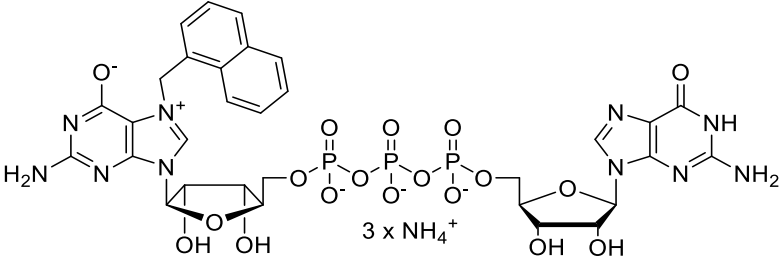                                                                                                                                                                                                                                                                                                          |                      |     |       |       |       |      |        |      |
| Reaction RP HPLC Profile                | <p>DAD1 A, Sig=254,4 Ref=360,100 (RAD\2019-01-0816-41-21NAPH-1-CH2-7GPPPG.D)</p>  <table border="1"><thead><tr><th>Retention Time (min)</th><th>mAU</th></tr></thead><tbody><tr><td>4.273</td><td>~800</td></tr><tr><td>9.387</td><td>~800</td></tr><tr><td>11.333</td><td>~300</td></tr></tbody></table> | Retention Time (min) | mAU | 4.273 | ~800  | 9.387 | ~800 | 11.333 | ~300 |
| Retention Time (min)                    | mAU                                                                                                                                                                                                                                                                                                                                                                                         |                      |     |       |       |       |      |        |      |
| 4.273                                   | ~800                                                                                                                                                                                                                                                                                                                                                                                        |                      |     |       |       |       |      |        |      |
| 9.387                                   | ~800                                                                                                                                                                                                                                                                                                                                                                                        |                      |     |       |       |       |      |        |      |
| 11.333                                  | ~300                                                                                                                                                                                                                                                                                                                                                                                        |                      |     |       |       |       |      |        |      |
| Purified Product RP HPLC Profile        | <p>DAD1 A, Sig=254,4 Ref=360,100 (RAD\2019-04-0814-2/-31NAPH-1-CH2-/GPPPG.D)</p>  <table border="1"><thead><tr><th>Retention Time (min)</th><th>mAU</th></tr></thead><tbody><tr><td>9.267</td><td>~2000</td></tr></tbody></table>                                                                       | Retention Time (min) | mAU | 9.267 | ~2000 |       |      |        |      |
| Retention Time (min)                    | mAU                                                                                                                                                                                                                                                                                                                                                                                         |                      |     |       |       |       |      |        |      |
| 9.267                                   | ~2000                                                                                                                                                                                                                                                                                                                                                                                       |                      |     |       |       |       |      |        |      |

## HRMS ES(-)

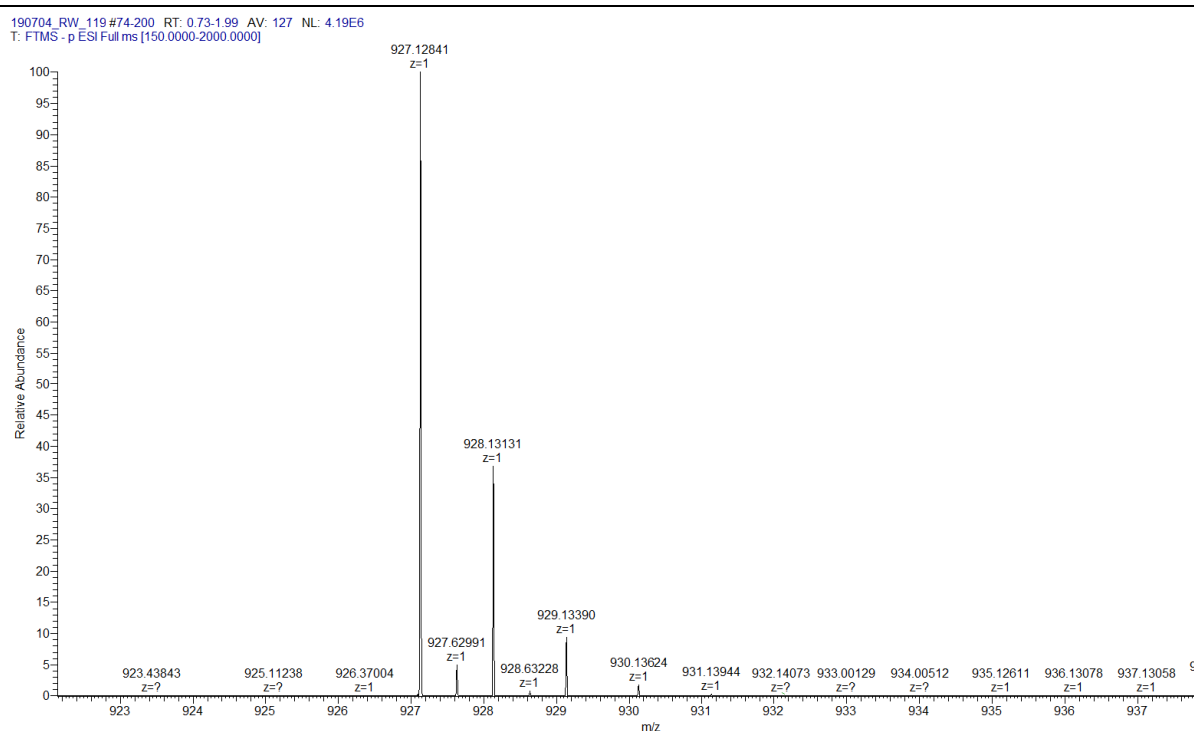 $^1\text{H}$  NMR (500.24 MHz)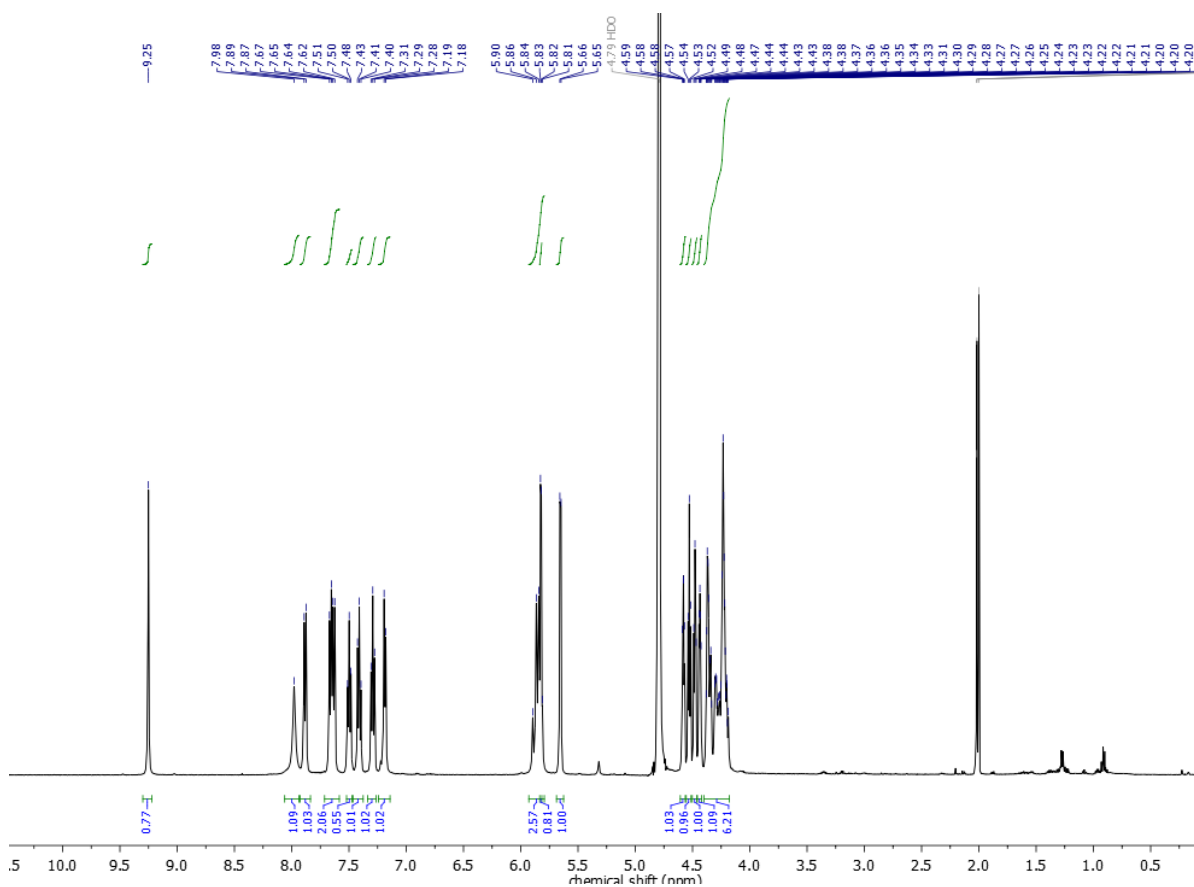

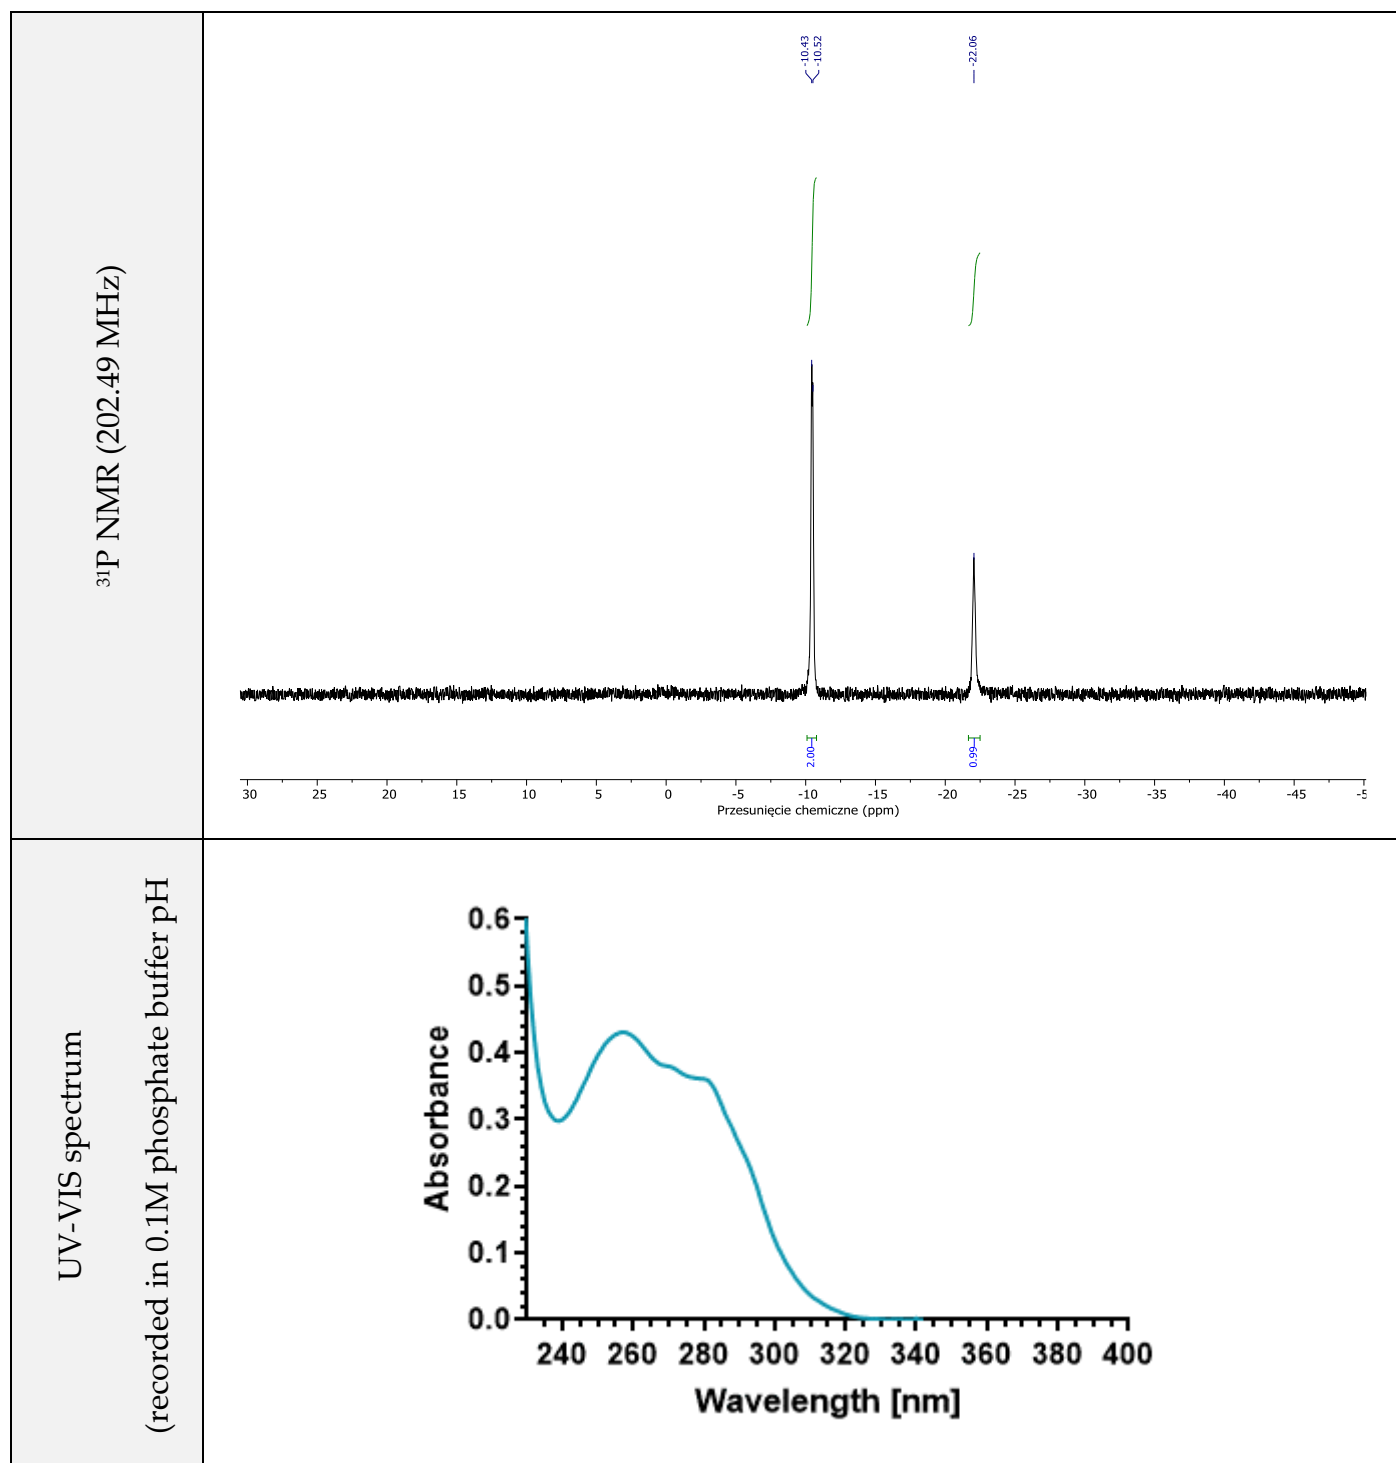

| $\beta$ -Naphm <sup>7</sup> GpppG ( <b>1p</b> ) |                                                                                                                                                                                                  |
|-------------------------------------------------|--------------------------------------------------------------------------------------------------------------------------------------------------------------------------------------------------|
| Structure                                       | 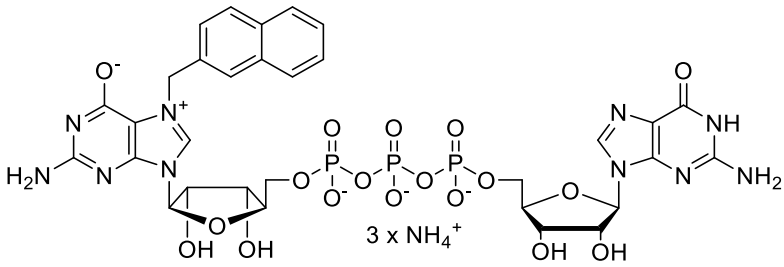                                                                                                               |
| Reaction RP HPLC Profile                        |  <p>DAD1 A, Sig=254,4 Ref=360,100 (RAD\2018-03-0914-02-22NAPH-2-CH2-7GPPPG.D)</p>                              |
| Purified Product RP HPLC Profile                |  <p>DAD1 A, Sig=254,4 Ref=360,100 (RAD\2017-07-0409-24-01NAPH-2-CH2-7GPPPG.D)</p>                            |
| HRMS ES(-)                                      |  <p>171213_RW_009 #14.93 RT: 0.12-0.72 AV: 70 NL: 1.61E6<br/>T: FTMS -p ESI Full.ms [150.0000-2000.0000]</p> |

$^1\text{H}$  NMR (500.24 MHz)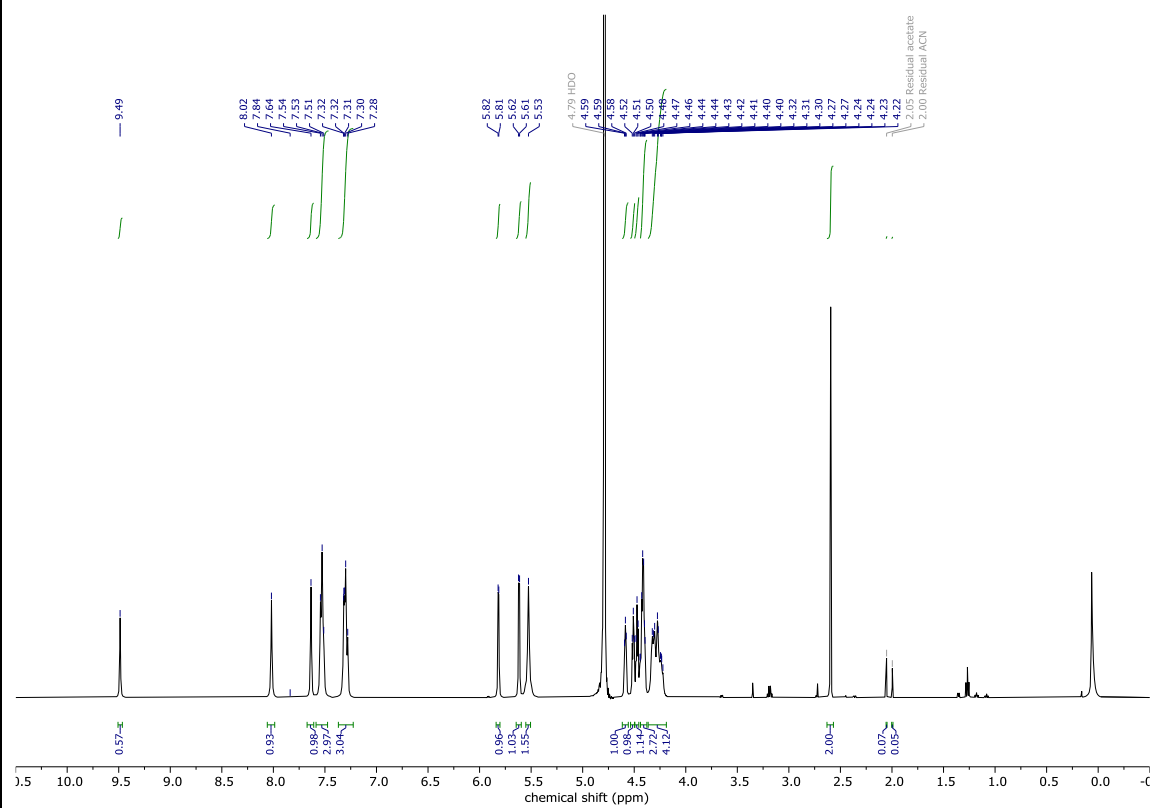 $^{31}\text{P}$  NMR (202.49 MHz)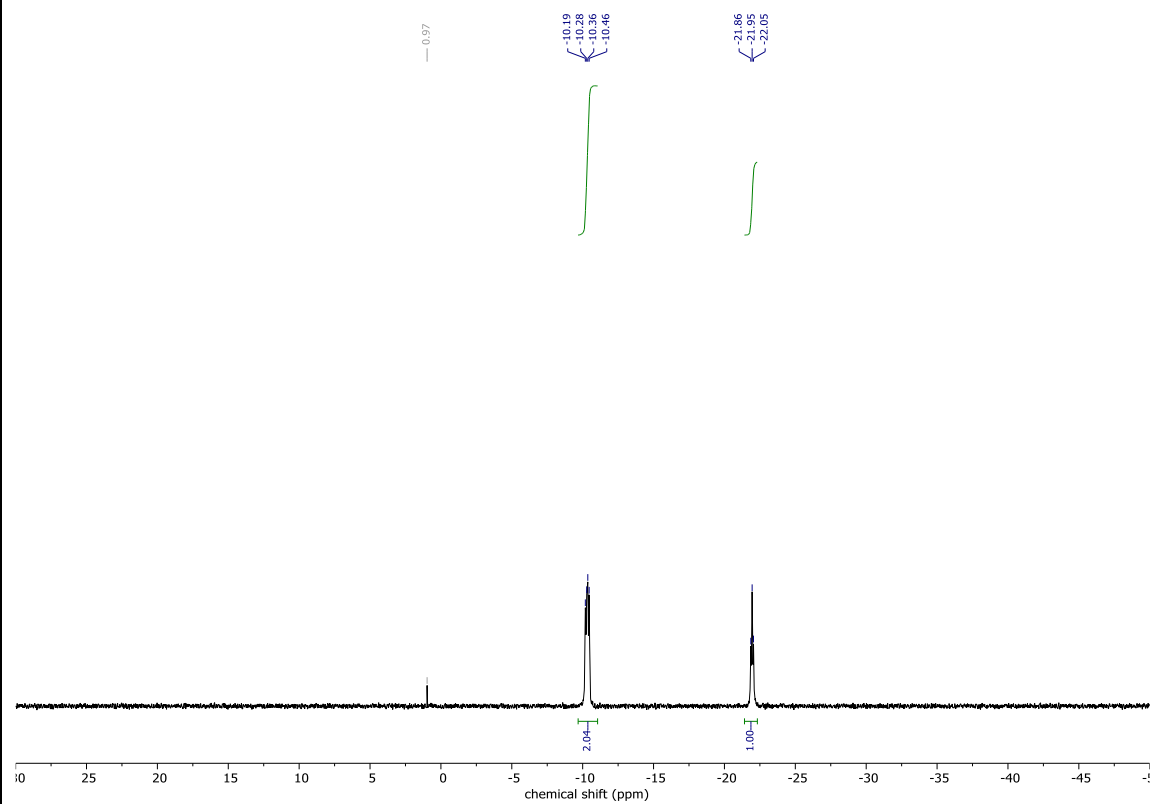

## UV-VIS spectrum

(recorded in 0.1M phosphate buffer pH 7.0)

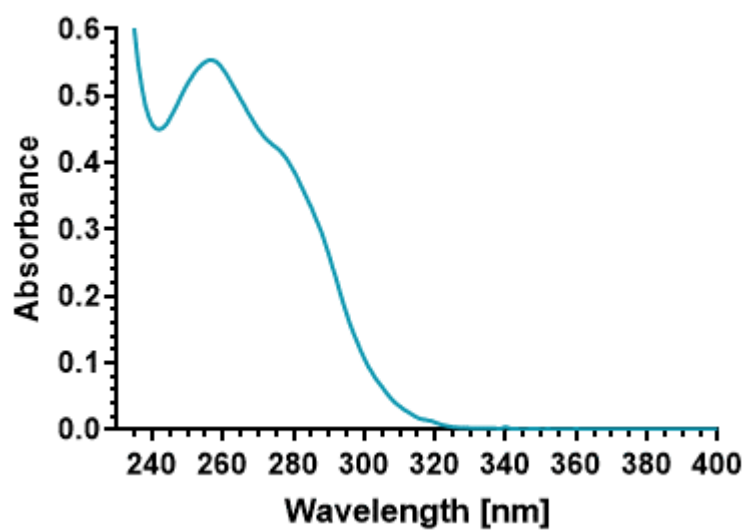

| Bn <sup>7</sup> G <sub>m</sub> pppG (1q) |                                                                                                                                                                                                  |
|------------------------------------------|--------------------------------------------------------------------------------------------------------------------------------------------------------------------------------------------------|
| Structure                                | 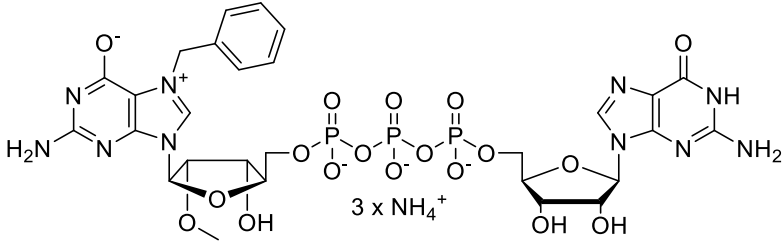                                                                                                               |
| Reaction RP HPLC Profile                 |  <p>DAD1 A, Sig=254,4 Ref=360,100 (RAD\2018-03-0514-46-282_OME-BN7GPPPG.D)</p>                                 |
| Purified Product RP HPLC Profile         |  <p>DAD1 A, Sig=254,4 Ref=360,100 (RAD\2018-03-1316-12-222_OME-BN7GPPPG.D)</p>                               |
| HRMS ES(-)                               |  <p>171213_RW_010 #8-75 RT: 0.07-0.85 AV: 68 NL: 2.14E6<br/>T: FTMS - p ESI Full ms [150.0000-2000.0000]</p> |



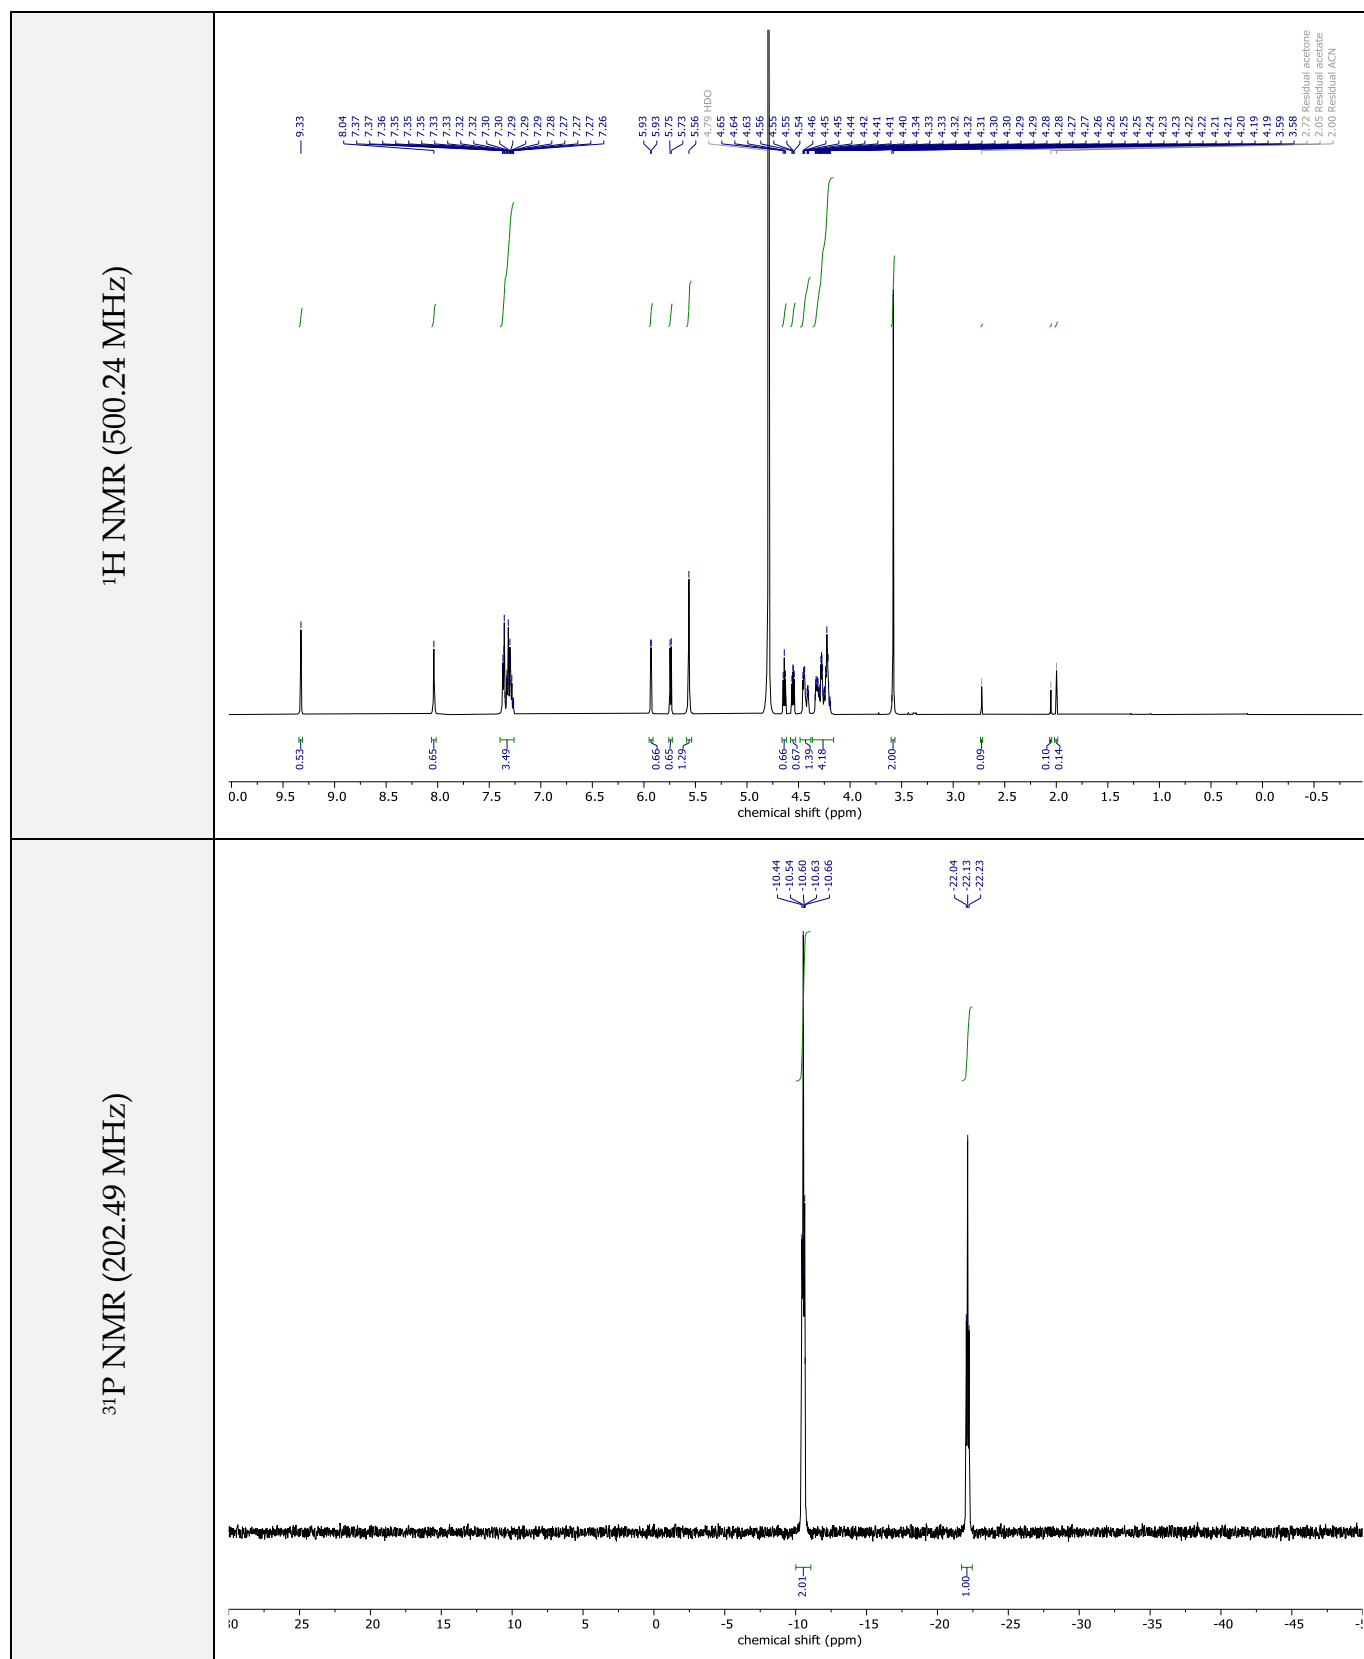

## UV-VIS spectrum

(recorded in 0.1M phosphate buffer pH 7.0)

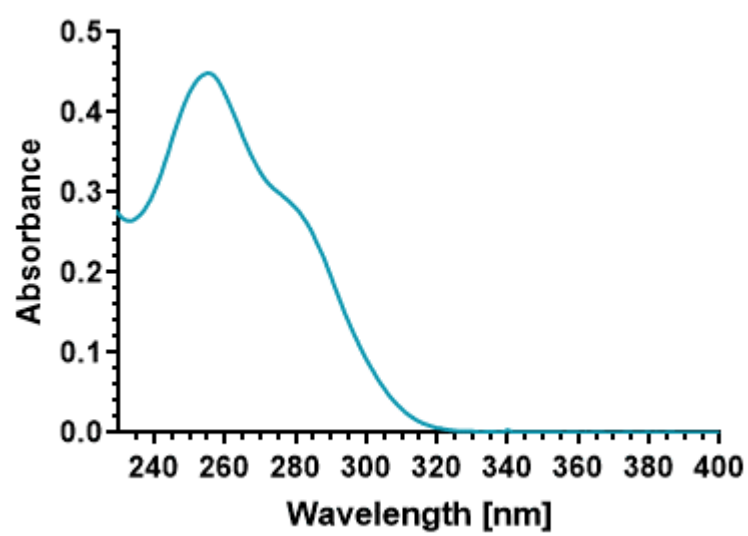

| 4-Cl-Bn <sup>7</sup> G <sub>m</sub> pppG (1r) |                                                                                                               |
|-----------------------------------------------|---------------------------------------------------------------------------------------------------------------|
| Structure                                     |                                                                                                               |
| Reaction RP HPLC Profile                      | <p>DAD1 A, Sig=254,4 Ref=360,100 (RAD\2017-11-0213-28-532_OME-4-CL-BN7GPPPG.D)</p>                            |
| Purified Product RP HPLC Profile              | <p>DAD1 A, Sig=254,4 Ref=360,100 (RAD\2017-11-1515-19-282_OME-4-CL-BN7GPPPG.D)</p>                            |
| HRMS ES(-)                                    | <p>171213_RW_011 #3-105 RT: 0.03-0.92 AV: 103 NL: 3.61E6<br/>T: FTMS - p ESI Full ms [150.0000-2000.0000]</p> |

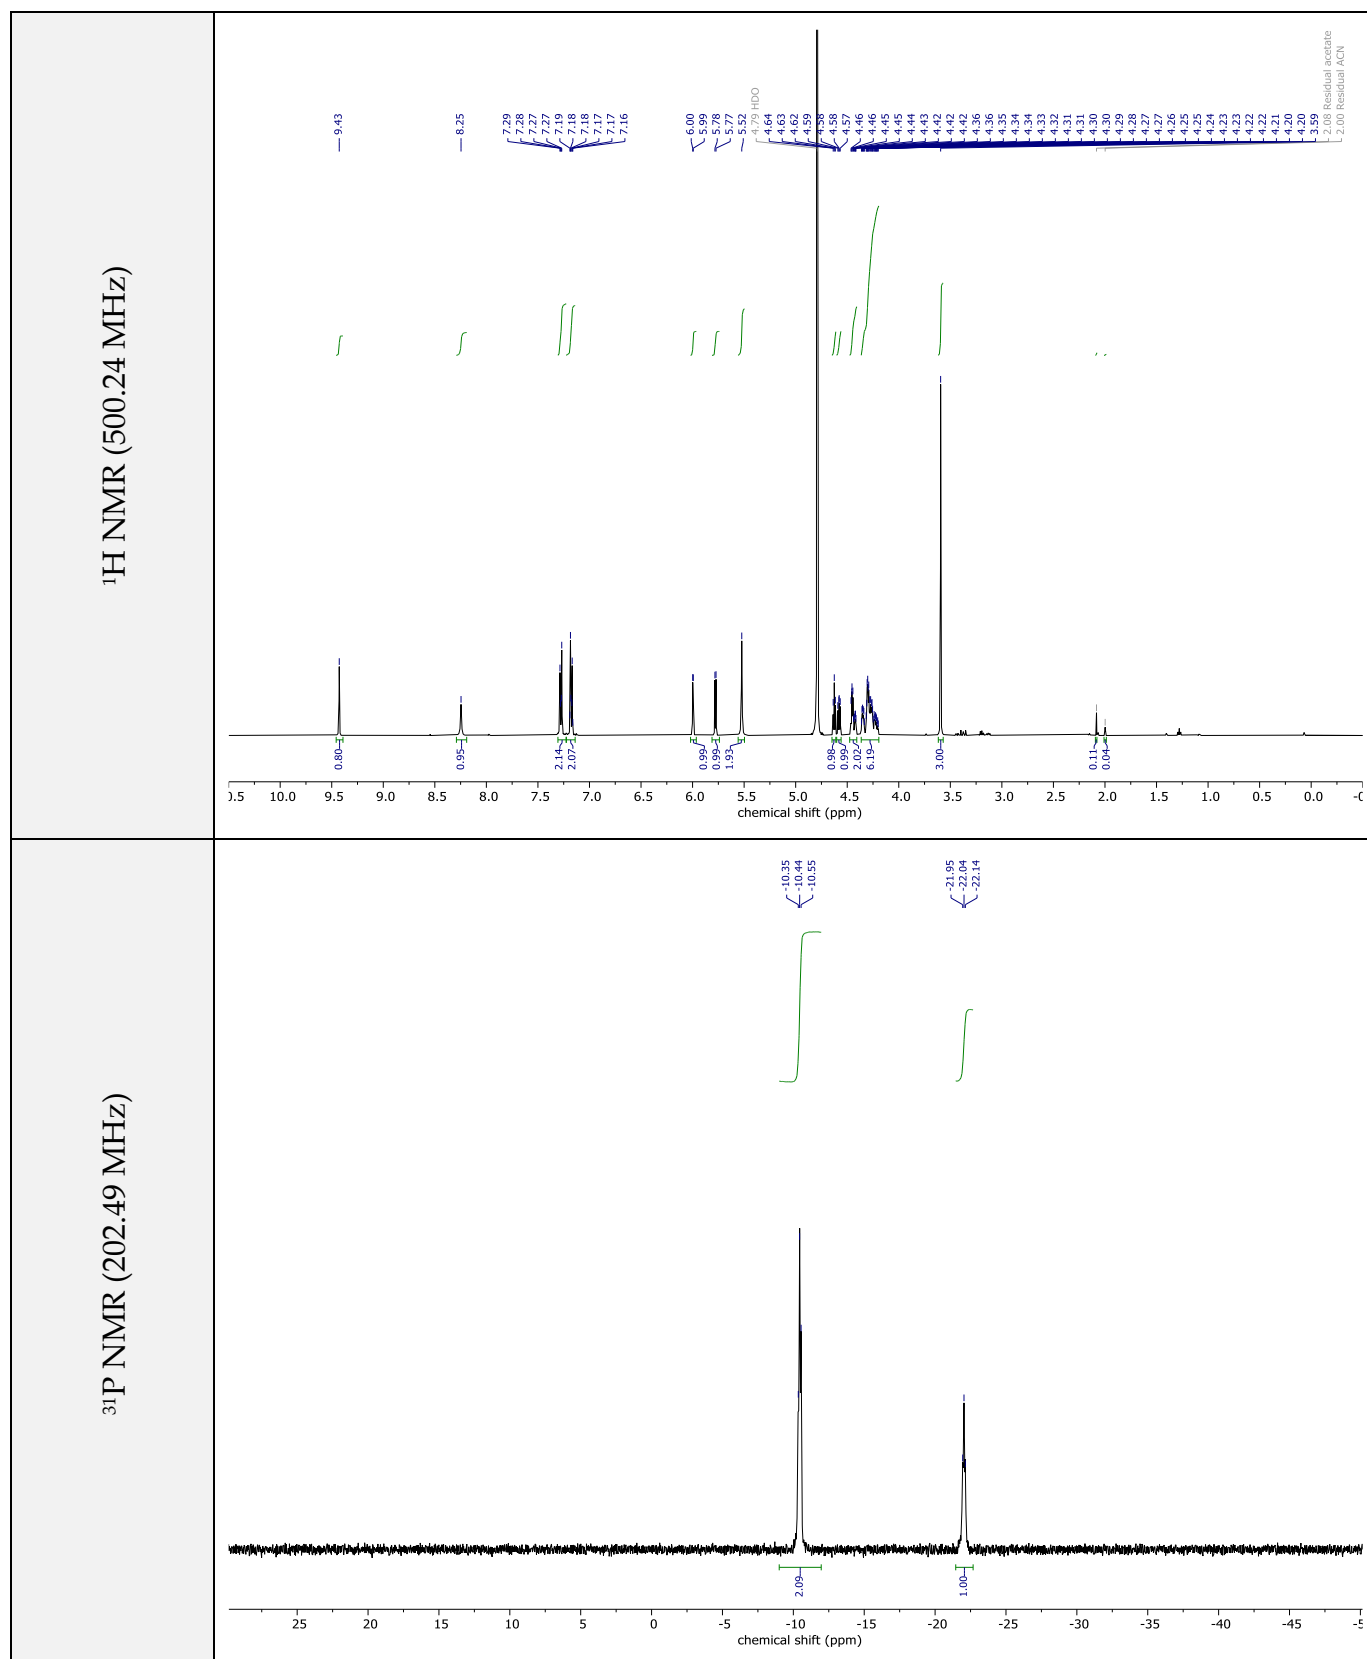

## UV-VIS spectrum

(recorded in 0.1M phosphate buffer pH 7.0)

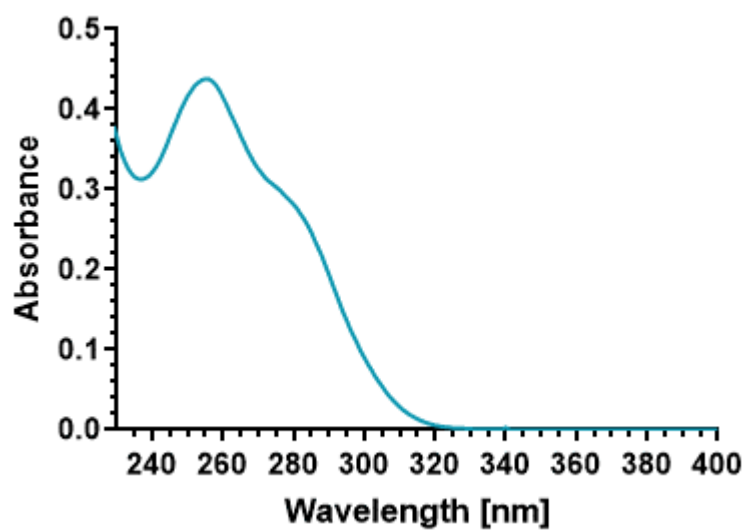

Supplement: s1 [file s1]
